# Supplementary material for: Anesthesiologists’ Preferences regarding Visitor Presence during Placement of Neuraxial Labor Analgesia
Source: Hindawi journal article supplement (doi:10.1155/2018/3481975), 2018-01-01

# Notes

|                           |                                   |                                                                                                                                                                                                                                                                                                                                                                                                                                                         |
|---------------------------|-----------------------------------|---------------------------------------------------------------------------------------------------------------------------------------------------------------------------------------------------------------------------------------------------------------------------------------------------------------------------------------------------------------------------------------------------------------------------------------------------------|
| Output Created            |                                   | 20-JAN-2016 21:40:42                                                                                                                                                                                                                                                                                                                                                                                                                                    |
| Comments                  |                                   |                                                                                                                                                                                                                                                                                                                                                                                                                                                         |
| Input                     | Data                              | /Users/Keshar/Desktop<br>/THUMBDRIVE/SURVEY<br>MONKEY/TotalData.sav                                                                                                                                                                                                                                                                                                                                                                                     |
|                           | Active Dataset                    | DataSet1                                                                                                                                                                                                                                                                                                                                                                                                                                                |
|                           | Filter                            | <none>                                                                                                                                                                                                                                                                                                                                                                                                                                                  |
|                           | Weight                            | <none>                                                                                                                                                                                                                                                                                                                                                                                                                                                  |
|                           | Split File                        | <none>                                                                                                                                                                                                                                                                                                                                                                                                                                                  |
|                           | N of Rows in<br>Working Data File | 1302                                                                                                                                                                                                                                                                                                                                                                                                                                                    |
| Missing Value<br>Handling | Definition of<br>Missing          | User-defined missing<br>values are treated as<br>missing.                                                                                                                                                                                                                                                                                                                                                                                               |
|                           | Cases Used                        | Statistics for each table<br>are based on all the<br>cases with valid data in<br>the specified range(s)<br>for all variables in each<br>table.                                                                                                                                                                                                                                                                                                          |
| Syntax                    |                                   | CROSSTABS<br><br>/TABLES=NeuraxialProc<br>PerWeek AttendingYears<br>Qualification Region<br>Setting Nature BY<br>PrefTechnique<br>PtInRoomPolicy<br>NoPolicyAllowVisitor<br>VisitorStandingSitting<br>VisitorNoViewView<br>ReasonForVisitor<br>OutsideInfluenceFOR<br>OutsideInfluenceAGAINS<br>T<br>ReasonForNOTAllowing<br>Visitor<br>/FORMAT=AVALUE<br>TABLES<br>/STATISTICS=CHISQ<br>/CELLS=COUNT ROW<br>ASRESID<br>/COUNT ROUND CELL<br>/BARChart. |
| Resources                 | Processor Time                    | 00:00:08.12                                                                                                                                                                                                                                                                                                                                                                                                                                             |
|                           | Elapsed Time                      | 00:00:08.00                                                                                                                                                                                                                                                                                                                                                                                                                                             |
|                           | Dimensions<br>Requested           | 2                                                                                                                                                                                                                                                                                                                                                                                                                                                       |
|                           | Cells Available                   | 131029                                                                                                                                                                                                                                                                                                                                                                                                                                                  |

On an average, how many neuraxial procedures for labor analgesia do you perform per week? \* What is your preferred technique for neuraxial labor analgesia in an otherwise healthy parturient?

Crosstab

|                                                                                           |       |                                                                                                    | What is your preferred technique for neuraxial labor analgesia in an otherwise healthy parturient? |                                    | Total  |
|-------------------------------------------------------------------------------------------|-------|----------------------------------------------------------------------------------------------------|----------------------------------------------------------------------------------------------------|------------------------------------|--------|
|                                                                                           |       |                                                                                                    | Epidural analgesia                                                                                 | Combined spinal epidural analgesia |        |
| On an average, how many neuraxial procedures for labor analgesia do you perform per week? | < 2   | Count                                                                                              | 244                                                                                                | 60                                 | 304    |
|                                                                                           |       | % within On an average, how many neuraxial procedures for labor analgesia do you perform per week? | 80.3%                                                                                              | 19.7%                              | 100.0% |
|                                                                                           |       | Adjusted Residual                                                                                  | 1.1                                                                                                | -1.1                               |        |
|                                                                                           |       |                                                                                                    |                                                                                                    |                                    |        |
|                                                                                           | 2- 5  | Count                                                                                              | 356                                                                                                | 76                                 | 432    |
|                                                                                           |       | % within On an average, how many neuraxial procedures for labor analgesia do you perform per week? | 82.4%                                                                                              | 17.6%                              | 100.0% |
|                                                                                           |       | Adjusted Residual                                                                                  | 2.7                                                                                                | -2.7                               |        |
|                                                                                           |       |                                                                                                    |                                                                                                    |                                    |        |
|                                                                                           | 6- 10 | Count                                                                                              | 207                                                                                                | 71                                 | 278    |
|                                                                                           |       | % within On an average, how many neuraxial procedures for labor analgesia do you perform per week? | 74.5%                                                                                              | 25.5%                              | 100.0% |
|                                                                                           |       | Adjusted Residual                                                                                  | -1.6                                                                                               | 1.6                                |        |
|                                                                                           |       |                                                                                                    |                                                                                                    |                                    |        |

Crosstab

|       |                                                                                                    | What is your preferred technique for neuraxial labor analgesia in an otherwise healthy parturient? |                                    | Total  |
|-------|----------------------------------------------------------------------------------------------------|----------------------------------------------------------------------------------------------------|------------------------------------|--------|
|       |                                                                                                    | Epidural analgesia                                                                                 | Combined spinal epidural analgesia |        |
| > 10  | Count                                                                                              | 208                                                                                                | 79                                 | 287    |
|       | % within On an average, how many neuraxial procedures for labor analgesia do you perform per week? | 72.5%                                                                                              | 27.5%                              | 100.0% |
|       | Adjusted Residual                                                                                  | -2.6                                                                                               | 2.6                                |        |
| Total |                                                                                                    | 1015                                                                                               | 286                                | 1301   |
|       |                                                                                                    | 78.0%                                                                                              | 22.0%                              | 100.0% |

Chi-Square Tests

|                              | Value               | df | Asymp. Sig. (2-sided) |
|------------------------------|---------------------|----|-----------------------|
| Pearson Chi-Square           | 12.942 <sup>a</sup> | 3  | .005                  |
| Likelihood Ratio             | 12.881              | 3  | .005                  |
| Linear-by-Linear Association | 9.154               | 1  | .002                  |
| N of Valid Cases             | 1301                |    |                       |

a. 0 cells (0.0%) have expected count less than 5. The minimum expected count is 61.11.

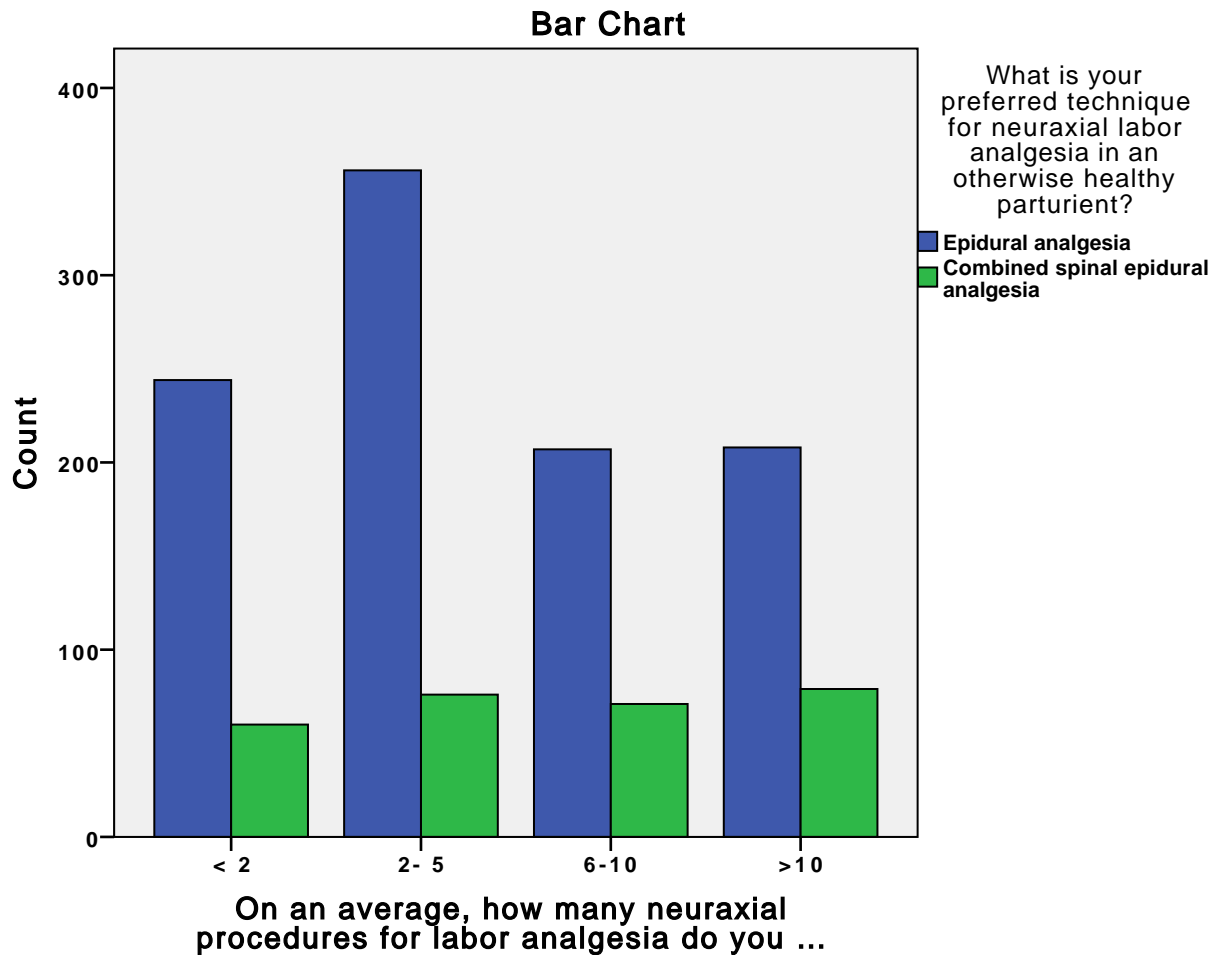

**On an average, how many neuraxial procedures for labor analgesia do you perform per week? \* Does your practice or hospital have a written policy regarding allowing a patient's visitor in the room during placement of neuraxial labor analgesia?**

Crosstab

|                                                                                           |       |                                                                                                    | Does your practice or hospital have a written policy regarding allowing a patient's visitor in the room during placement of neuraxial labor . |                                                        |                          |
|-------------------------------------------------------------------------------------------|-------|----------------------------------------------------------------------------------------------------|-----------------------------------------------------------------------------------------------------------------------------------------------|--------------------------------------------------------|--------------------------|
|                                                                                           |       |                                                                                                    | Yes, a written policy exists - Allows visitors                                                                                                | Yes, a written policy exists - Does not allow visitors | No written policy exists |
| On an average, how many neuraxial procedures for labor analgesia do you perform per week? | < 2   | Count                                                                                              | 35                                                                                                                                            | 9                                                      | 108                      |
|                                                                                           |       | % within On an average, how many neuraxial procedures for labor analgesia do you perform per week? | 11.5%                                                                                                                                         | 3.0%                                                   | 35.5%                    |
|                                                                                           |       | Adjusted Residual                                                                                  | -5.2                                                                                                                                          | -3.7                                                   | -1.6                     |
|                                                                                           | 2- 5  | Count                                                                                              | 93                                                                                                                                            | 26                                                     | 176                      |
|                                                                                           |       | % within On an average, how many neuraxial procedures for labor analgesia do you perform per week? | 21.5%                                                                                                                                         | 6.0%                                                   | 40.7%                    |
|                                                                                           |       | Adjusted Residual                                                                                  | -.6                                                                                                                                           | -1.9                                                   | .7                       |
|                                                                                           | 6- 10 | Count                                                                                              | 70                                                                                                                                            | 29                                                     | 126                      |
|                                                                                           |       | % within On an average, how many neuraxial procedures for labor analgesia do you perform per week? | 25.2%                                                                                                                                         | 10.4%                                                  | 45.3%                    |
|                                                                                           |       | Adjusted Residual                                                                                  | 1.2                                                                                                                                           | 1.6                                                    | 2.3                      |

Crosstab

|                                                                                           |       |                                                                                                    | Does your practice or hospital have a ... |        |
|-------------------------------------------------------------------------------------------|-------|----------------------------------------------------------------------------------------------------|-------------------------------------------|--------|
|                                                                                           |       |                                                                                                    | I do not know                             | Total  |
| On an average, how many neuraxial procedures for labor analgesia do you perform per week? | < 2   | Count                                                                                              | 152                                       | 304    |
|                                                                                           |       | % within On an average, how many neuraxial procedures for labor analgesia do you perform per week? | 50.0%                                     | 100.0% |
|                                                                                           |       | Adjusted Residual                                                                                  | 8.7                                       |        |
|                                                                                           | 2- 5  | Count                                                                                              | 137                                       | 432    |
|                                                                                           |       | % within On an average, how many neuraxial procedures for labor analgesia do you perform per week? | 31.7%                                     | 100.0% |
|                                                                                           |       | Adjusted Residual                                                                                  | 1.0                                       |        |
|                                                                                           | 6- 10 | Count                                                                                              | 53                                        | 278    |
|                                                                                           |       | % within On an average, how many neuraxial procedures for labor analgesia do you perform per week? | 19.1%                                     | 100.0% |
|                                                                                           |       | Adjusted Residual                                                                                  | -4.5                                      |        |

Crosstab

|       |                                                                                                    | Does your practice or hospital have a written policy regarding allowing a patient's visitor in the room during placement of neuraxial labor . |                                                        |                          |
|-------|----------------------------------------------------------------------------------------------------|-----------------------------------------------------------------------------------------------------------------------------------------------|--------------------------------------------------------|--------------------------|
|       |                                                                                                    | Yes, a written policy exists - Allows visitors                                                                                                | Yes, a written policy exists - Does not allow visitors | No written policy exists |
| > 10  | Count                                                                                              | 95                                                                                                                                            | 41                                                     | 103                      |
|       | % within On an average, how many neuraxial procedures for labor analgesia do you perform per week? | 33.1%                                                                                                                                         | 14.3%                                                  | 35.9%                    |
|       | Adjusted Residual                                                                                  | 4.9                                                                                                                                           | 4.4                                                    | -1.4                     |
| Total | Count                                                                                              | 293                                                                                                                                           | 105                                                    | 513                      |
|       | % within On an average, how many neuraxial procedures for labor analgesia do you perform per week? | 22.5%                                                                                                                                         | 8.1%                                                   | 39.4%                    |

Crosstab

|       |                                                                                                    | Does your practice or hospital have a ... |        |
|-------|----------------------------------------------------------------------------------------------------|-------------------------------------------|--------|
|       |                                                                                                    | I do not know                             | Total  |
| > 10  | Count                                                                                              | 48                                        | 287    |
|       | % within On an average, how many neuraxial procedures for labor analgesia do you perform per week? | 16.7%                                     | 100.0% |
|       | Adjusted Residual                                                                                  | -5.6                                      |        |
| Total | Count                                                                                              | 390                                       | 1301   |
|       | % within On an average, how many neuraxial procedures for labor analgesia do you perform per week? | 30.0%                                     | 100.0% |

### Chi-Square Tests

|                              | Value                | df | Asymp. Sig. (2-sided) |
|------------------------------|----------------------|----|-----------------------|
| Pearson Chi-Square           | 133.104 <sup>a</sup> | 9  | .000                  |
| Likelihood Ratio             | 133.468              | 9  | .000                  |
| Linear-by-Linear Association | 99.543               | 1  | .000                  |
| N of Valid Cases             | 1301                 |    |                       |

a. 0 cells (0.0%) have expected count less than 5. The minimum expected count is 22.44.

### Bar Chart

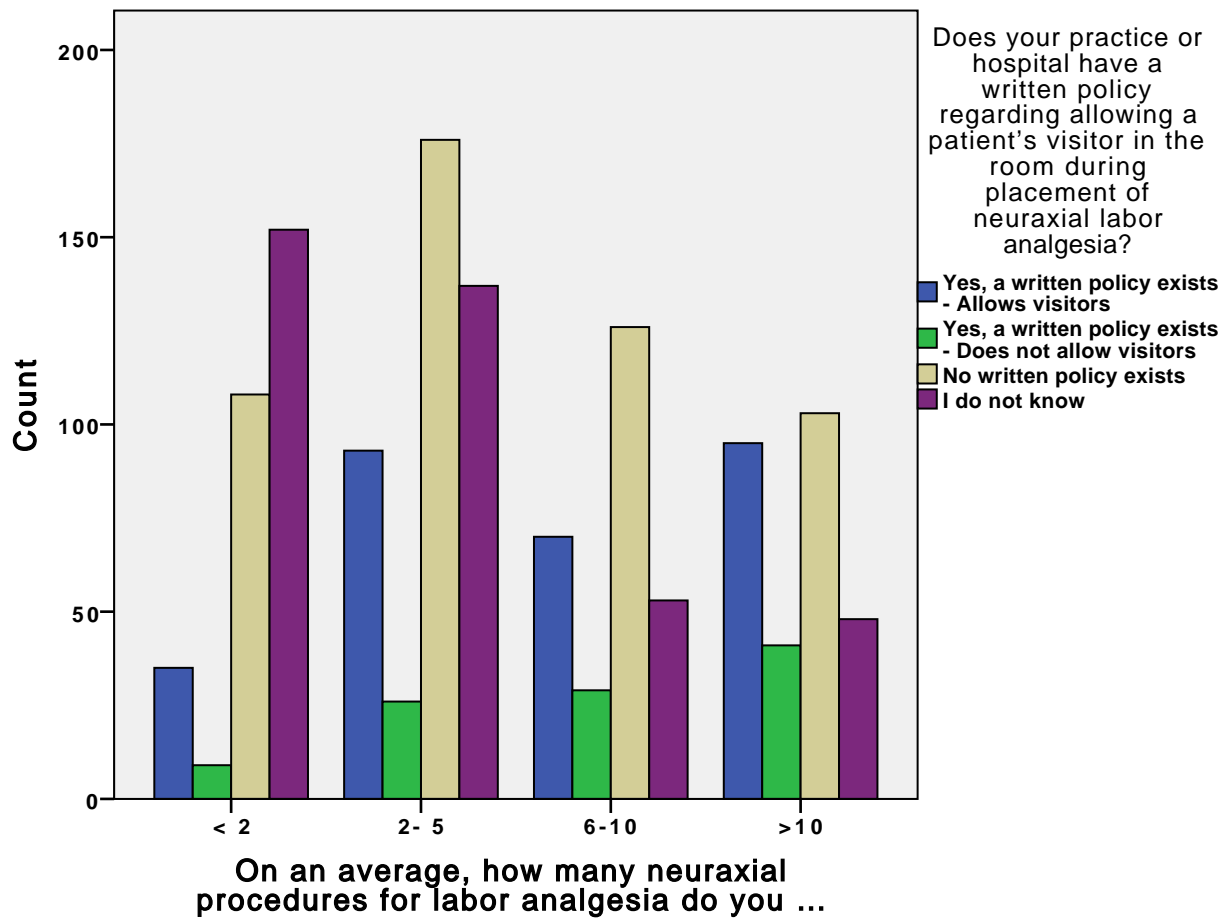

On an average, how many neuraxial procedures for labor analgesia do you perform per week? \* If no policy existed, would you be open to allowing a patient's visitor in the room during placement of neuraxial labor analgesia?



Crosstab

|                                                                                           |       |                                                                                                             | If no policy existed, would you be open to allowing a patient's visitor in the room during placement of neuraxial labor analgesia? |                 | Total             |
|-------------------------------------------------------------------------------------------|-------|-------------------------------------------------------------------------------------------------------------|------------------------------------------------------------------------------------------------------------------------------------|-----------------|-------------------|
|                                                                                           |       |                                                                                                             | Yes                                                                                                                                | No              |                   |
| On an average, how many neuraxial procedures for labor analgesia do you perform per week? | < 2   | Count<br>% within On an average, how many neuraxial procedures for labor analgesia do you perform per week? | 225<br><br>74.0%                                                                                                                   | 79<br><br>26.0% | 304<br><br>100.0% |
|                                                                                           |       | Adjusted Residual                                                                                           | -.5                                                                                                                                | .5              |                   |
|                                                                                           | 2- 5  | Count<br>% within On an average, how many neuraxial procedures for labor analgesia do you perform per week? | 345<br><br>79.9%                                                                                                                   | 87<br><br>20.1% | 432<br><br>100.0% |
|                                                                                           |       | Adjusted Residual                                                                                           | 2.8                                                                                                                                | -2.8            |                   |
|                                                                                           | 6- 10 | Count<br>% within On an average, how many neuraxial procedures for labor analgesia do you perform per week? | 207<br><br>74.5%                                                                                                                   | 71<br><br>25.5% | 278<br><br>100.0% |
|                                                                                           |       | Adjusted Residual                                                                                           | -.3                                                                                                                                | .3              |                   |

Crosstab

|       |                                                                                                    | If no policy existed, would you be open to allowing a patient's visitor in the room during placement of neuraxial labor analgesia? |       | Total  |
|-------|----------------------------------------------------------------------------------------------------|------------------------------------------------------------------------------------------------------------------------------------|-------|--------|
|       |                                                                                                    | Yes                                                                                                                                | No    |        |
| > 10  | Count                                                                                              | 200                                                                                                                                | 87    | 287    |
|       | % within On an average, how many neuraxial procedures for labor analgesia do you perform per week? | 69.7%                                                                                                                              | 30.3% | 100.0% |
|       | Adjusted Residual                                                                                  | -2.4                                                                                                                               | 2.4   |        |
| Total | Count                                                                                              | 977                                                                                                                                | 324   | 1301   |
|       | % within On an average, how many neuraxial procedures for labor analgesia do you perform per week? | 75.1%                                                                                                                              | 24.9% | 100.0% |

Chi-Square Tests

|                              | Value              | df | Asymp. Sig. (2-sided) |
|------------------------------|--------------------|----|-----------------------|
| Pearson Chi-Square           | 9.986 <sup>a</sup> | 3  | .019                  |
| Likelihood Ratio             | 10.043             | 3  | .018                  |
| Linear-by-Linear Association | 3.107              | 1  | .078                  |
| N of Valid Cases             | 1301               |    |                       |

a. 0 cells (0.0%) have expected count less than 5. The minimum expected count is 69.23.

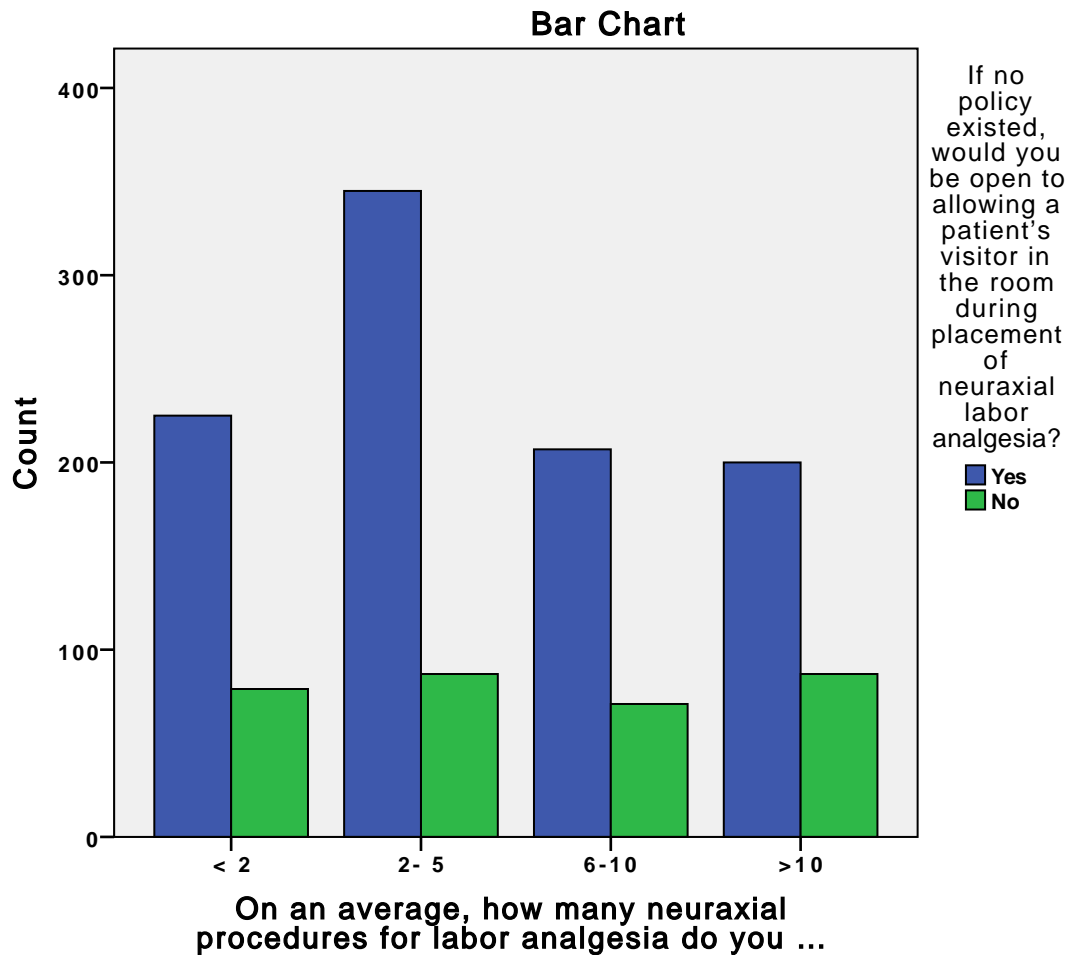

**On an average, how many neuraxial procedures for labor analgesia do you perform per week? \* If you allowed a visitor in the room during placement of neuraxial labor analgesia, you would want to have**

Crosstab

|                                                                                           |       |                                                                                                    | If you allowed a visitor in the room during placement of neuraxial labor analgesia, you would want the |                        |                 |
|-------------------------------------------------------------------------------------------|-------|----------------------------------------------------------------------------------------------------|--------------------------------------------------------------------------------------------------------|------------------------|-----------------|
|                                                                                           |       |                                                                                                    | Visitor always standing                                                                                | Visitor always sitting | Does not matter |
| On an average, how many neuraxial procedures for labor analgesia do you perform per week? | < 2   | Count                                                                                              | 7                                                                                                      | 149                    | 68              |
|                                                                                           |       | % within On an average, how many neuraxial procedures for labor analgesia do you perform per week? | 3.1%                                                                                                   | 66.5%                  | 30.4%           |
|                                                                                           |       | Adjusted Residual                                                                                  | 2.4                                                                                                    | -2.1                   | 1.5             |
|                                                                                           | 2- 5  | Count                                                                                              | 2                                                                                                      | 241                    | 99              |
|                                                                                           |       | % within On an average, how many neuraxial procedures for labor analgesia do you perform per week? | 0.6%                                                                                                   | 70.5%                  | 28.9%           |
|                                                                                           |       | Adjusted Residual                                                                                  | -1.6                                                                                                   | -.8                    | 1.3             |
|                                                                                           | 6- 10 | Count                                                                                              | 2                                                                                                      | 155                    | 49              |
|                                                                                           |       | % within On an average, how many neuraxial procedures for labor analgesia do you perform per week? | 1.0%                                                                                                   | 75.2%                  | 23.8%           |
|                                                                                           |       | Adjusted Residual                                                                                  | -.6                                                                                                    | 1.2                    | -1.0            |

Crosstab

|                                                                                           |       |                                                                                                    | Total  |
|-------------------------------------------------------------------------------------------|-------|----------------------------------------------------------------------------------------------------|--------|
| On an average, how many neuraxial procedures for labor analgesia do you perform per week? | < 2   | Count                                                                                              | 224    |
|                                                                                           |       | % within On an average, how many neuraxial procedures for labor analgesia do you perform per week? | 100.0% |
|                                                                                           |       | Adjusted Residual                                                                                  |        |
|                                                                                           | 2- 5  | Count                                                                                              | 342    |
|                                                                                           |       | % within On an average, how many neuraxial procedures for labor analgesia do you perform per week? | 100.0% |
|                                                                                           |       | Adjusted Residual                                                                                  |        |
|                                                                                           | 6- 10 | Count                                                                                              | 206    |
|                                                                                           |       | % within On an average, how many neuraxial procedures for labor analgesia do you perform per week? | 100.0% |
|                                                                                           |       | Adjusted Residual                                                                                  |        |

Crosstab

|       |                                                                                                                                      | If you allowed a visitor in the room during placement of neuraxial labor analgesia, you would want the |                             |                             |
|-------|--------------------------------------------------------------------------------------------------------------------------------------|--------------------------------------------------------------------------------------------------------|-----------------------------|-----------------------------|
|       |                                                                                                                                      | Visitor always standing                                                                                | Visitor always sitting      | Does not matter             |
| > 10  | Count<br>% within On an average, how many neuraxial procedures for labor analgesia do you perform per week?<br><br>Adjusted Residual | 3<br><br>1.5%<br><br>.1                                                                                | 156<br><br>77.6%<br><br>2.0 | 42<br><br>20.9%<br><br>-2.0 |
| Total | Count<br>% within On an average, how many neuraxial procedures for labor analgesia do you perform per week?                          | 14<br><br>1.4%                                                                                         | 701<br><br>72.0%            | 258<br><br>26.5%            |

Crosstab

|       |                                                                                                                                      | Total             |
|-------|--------------------------------------------------------------------------------------------------------------------------------------|-------------------|
| > 10  | Count<br>% within On an average, how many neuraxial procedures for labor analgesia do you perform per week?<br><br>Adjusted Residual | 201<br><br>100.0% |
| Total | Count<br>% within On an average, how many neuraxial procedures for labor analgesia do you perform per week?                          | 973<br><br>100.0% |

### Chi-Square Tests

|                              | Value               | df | Asymp. Sig. (2-sided) |
|------------------------------|---------------------|----|-----------------------|
| Pearson Chi-Square           | 13.685 <sup>a</sup> | 6  | .033                  |
| Likelihood Ratio             | 13.243              | 6  | .039                  |
| Linear-by-Linear Association | 4.443               | 1  | .035                  |
| N of Valid Cases             | 973                 |    |                       |

a. 4 cells (33.3%) have expected count less than 5. The minimum expected count is 2.89.

### Bar Chart

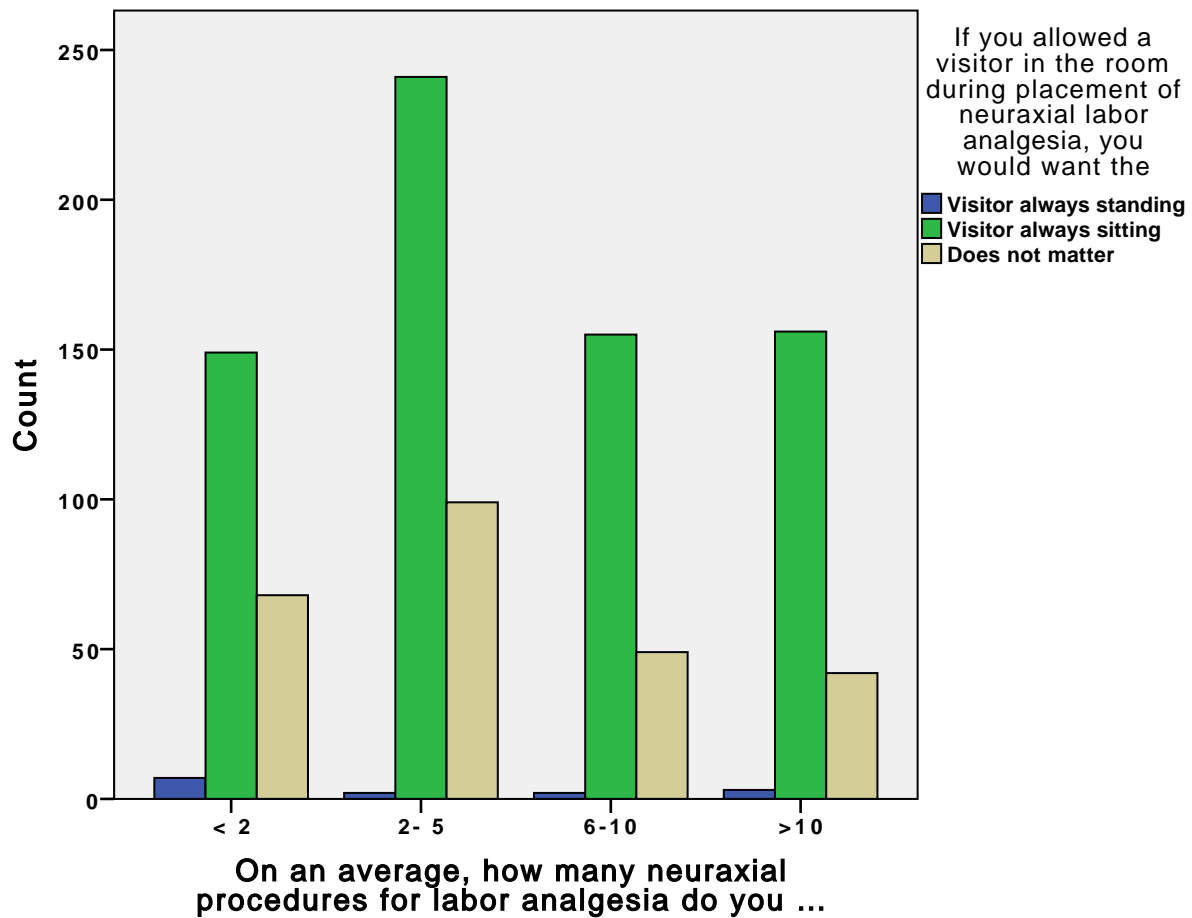

On an average, how many neuraxial procedures for labor analgesia do you perform per week? \* If you allowed a visitor in the room during placement of neuraxial labor analgesia, you would want the visitor to be positioned such that,

Crosstab

|                                                                                           |       |                                                                                                                                      | If you allowed a visitor in the room during placement of neuraxial labor analgesia, you would want the visitor to be positioned such that, |                                                              |                             |
|-------------------------------------------------------------------------------------------|-------|--------------------------------------------------------------------------------------------------------------------------------------|--------------------------------------------------------------------------------------------------------------------------------------------|--------------------------------------------------------------|-----------------------------|
|                                                                                           |       |                                                                                                                                      | Visitor has no view of procedure (patient is in between anes                                                                               | Visitor has partial view of workspace (but cannot see patien | Does not matter             |
| On an average, how many neuraxial procedures for labor analgesia do you perform per week? | < 2   | Count<br>% within On an average, how many neuraxial procedures for labor analgesia do you perform per week?<br><br>Adjusted Residual | 132<br><br>58.9%<br><br>-.7                                                                                                                | 47<br><br>21.0%<br><br>.9                                    | 45<br><br>20.1%<br><br>.1   |
|                                                                                           | 2- 5  | Count<br>% within On an average, how many neuraxial procedures for labor analgesia do you perform per week?<br><br>Adjusted Residual | 211<br><br>61.7%<br><br>.3                                                                                                                 | 53<br><br>15.5%<br><br>-2.1                                  | 78<br><br>22.8%<br><br>1.6  |
|                                                                                           | 6- 10 | Count<br>% within On an average, how many neuraxial procedures for labor analgesia do you perform per week?<br><br>Adjusted Residual | 129<br><br>62.6%<br><br>.5                                                                                                                 | 47<br><br>22.8%<br><br>1.6                                   | 30<br><br>14.6%<br><br>-2.2 |



Crosstab

|                                                                                           |      |                                                                                                    |        |
|-------------------------------------------------------------------------------------------|------|----------------------------------------------------------------------------------------------------|--------|
|                                                                                           |      |                                                                                                    | Total  |
| On an average, how many neuraxial procedures for labor analgesia do you perform per week? | < 2  | Count                                                                                              | 224    |
|                                                                                           |      | % within On an average, how many neuraxial procedures for labor analgesia do you perform per week? | 100.0% |
|                                                                                           |      | Adjusted Residual                                                                                  |        |
|                                                                                           | 2- 5 | Count                                                                                              | 342    |
|                                                                                           |      | % within On an average, how many neuraxial procedures for labor analgesia do you perform per week? | 100.0% |
|                                                                                           |      | Adjusted Residual                                                                                  |        |
|                                                                                           | 6-10 | Count                                                                                              | 206    |
|                                                                                           |      | % within On an average, how many neuraxial procedures for labor analgesia do you perform per week? | 100.0% |
|                                                                                           |      | Adjusted Residual                                                                                  |        |

Crosstab

|       |                                                                                                                                      | If you allowed a visitor in the room during placement of neuraxial labor analgesia, you would want the visitor to be positioned such that, |                                                              |                           |
|-------|--------------------------------------------------------------------------------------------------------------------------------------|--------------------------------------------------------------------------------------------------------------------------------------------|--------------------------------------------------------------|---------------------------|
|       |                                                                                                                                      | Visitor has no view of procedure (patient is in between anes                                                                               | Visitor has partial view of workspace (but cannot see patien | Does not matter           |
| > 10  | Count<br>% within On an average, how many neuraxial procedures for labor analgesia do you perform per week?<br><br>Adjusted Residual | 122<br><br>60.7%<br><br>-.1                                                                                                                | 38<br><br>18.9%<br><br>.0                                    | 41<br><br>20.4%<br><br>.2 |
| Total | Count<br>% within On an average, how many neuraxial procedures for labor analgesia do you perform per week?                          | 594<br><br>61.0%                                                                                                                           | 185<br><br>19.0%                                             | 194<br><br>19.9%          |

**Crosstab**

|       |                                                                                                                                  |               |
|-------|----------------------------------------------------------------------------------------------------------------------------------|---------------|
|       |                                                                                                                                  | Total         |
| > 10  | Count<br>% within On an average, how many neuraxial procedures for labor analgesia do you perform per week?<br>Adjusted Residual | 201<br>100.0% |
| Total | Count<br>% within On an average, how many neuraxial procedures for labor analgesia do you perform per week?                      | 973<br>100.0% |

**Chi-Square Tests**

|                              | Value              | df | Asymp. Sig. (2-sided) |
|------------------------------|--------------------|----|-----------------------|
| Pearson Chi-Square           | 8.945 <sup>a</sup> | 6  | .177                  |
| Likelihood Ratio             | 9.235              | 6  | .161                  |
| Linear-by-Linear Association | .375               | 1  | .540                  |
| N of Valid Cases             | 973                |    |                       |

a. 0 cells (0.0%) have expected count less than 5. The minimum expected count is 38.22.

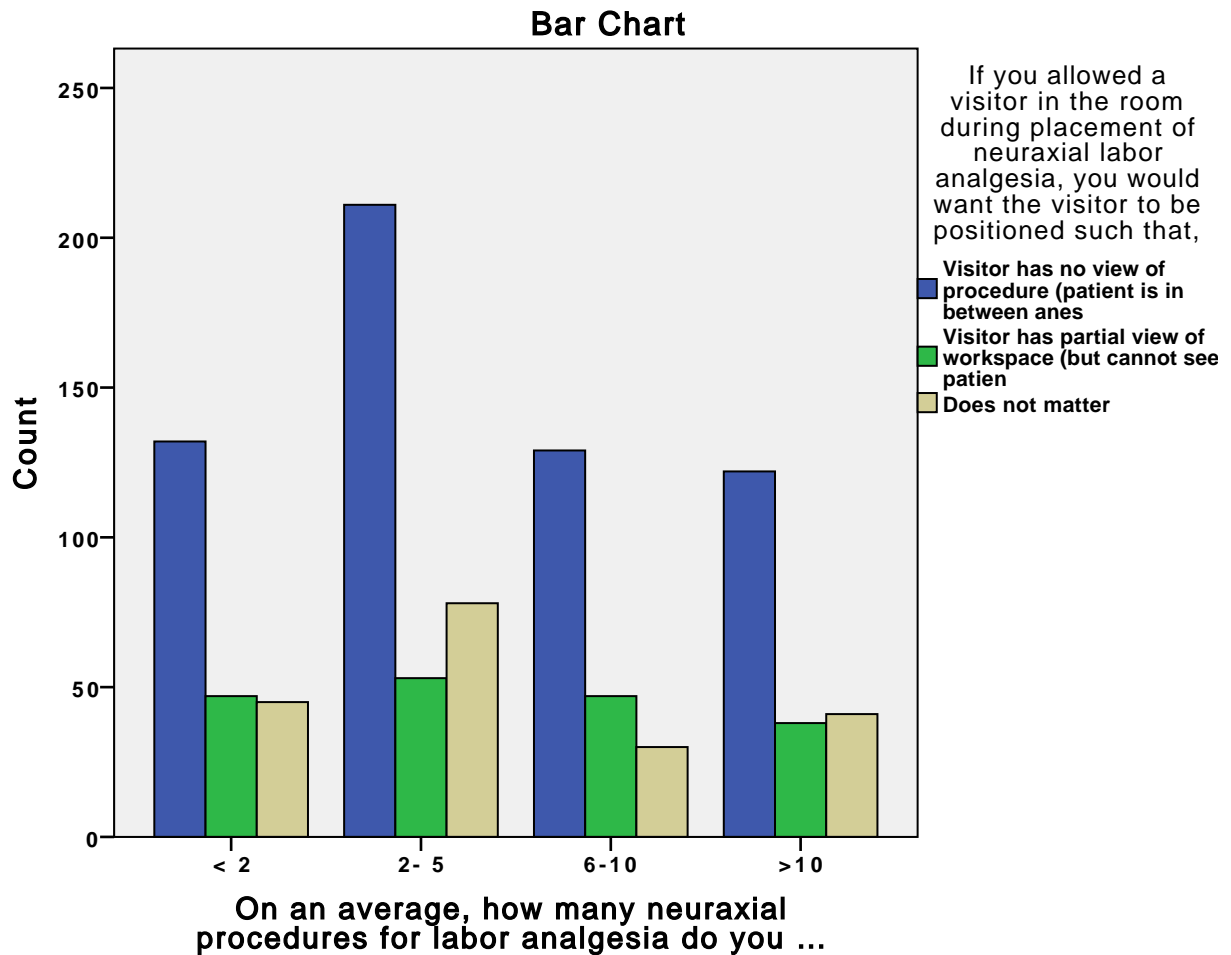

**On an average, how many neuraxial procedures for labor analgesia do you perform per week? \* What would be your single most important reason for allowing a patient's visitor in the room during placement of neuraxial labor analgesia?**

Crosstab

|                                                                                           |     |                                                                                                    | What would be your single most important reason for allowing a patient's visitor in the room during placement of neuraxial labor ... |                                                               |                                                                |
|-------------------------------------------------------------------------------------------|-----|----------------------------------------------------------------------------------------------------|--------------------------------------------------------------------------------------------------------------------------------------|---------------------------------------------------------------|----------------------------------------------------------------|
|                                                                                           |     |                                                                                                    | It would likely reduce patient's anxiety                                                                                             | It would likely reduce visitor's anxiety (for e. g. if visito | Visitor's assistance needed (for e. g. if visitor were a doula |
| On an average, how many neuraxial procedures for labor analgesia do you perform per week? | < 2 | Count                                                                                              | 141                                                                                                                                  | 14                                                            | 8                                                              |
|                                                                                           |     | % within On an average, how many neuraxial procedures for labor analgesia do you perform per week? | 62.9%                                                                                                                                | 6.3%                                                          | 3.6%                                                           |
|                                                                                           |     | Adjusted Residual                                                                                  | -.6                                                                                                                                  | .9                                                            | -.2                                                            |
| 2- 5                                                                                      |     | Count                                                                                              | 232                                                                                                                                  | 11                                                            | 10                                                             |
|                                                                                           |     | % within On an average, how many neuraxial procedures for labor analgesia do you perform per week? | 67.8%                                                                                                                                | 3.2%                                                          | 2.9%                                                           |
|                                                                                           |     | Adjusted Residual                                                                                  | 1.5                                                                                                                                  | -1.9                                                          | -1.1                                                           |
| 6-10                                                                                      |     | Count                                                                                              | 121                                                                                                                                  | 19                                                            | 9                                                              |
|                                                                                           |     | % within On an average, how many neuraxial procedures for labor analgesia do you perform per week? | 58.7%                                                                                                                                | 9.2%                                                          | 4.4%                                                           |
|                                                                                           |     | Adjusted Residual                                                                                  | -2.0                                                                                                                                 | 3.1                                                           | .5                                                             |

Crosstab

|                                                                                                             |       |                                                                                                                      | What would be<br>your single<br>most important ... |        |
|-------------------------------------------------------------------------------------------------------------|-------|----------------------------------------------------------------------------------------------------------------------|----------------------------------------------------|--------|
|                                                                                                             |       |                                                                                                                      | To fulfill<br>patient's<br>request                 | Total  |
| On an average,<br>how many<br>neuraxial<br>procedures for<br>labor analgesia do<br>you perform per<br>week? | < 2   | Count                                                                                                                | 61                                                 | 224    |
|                                                                                                             |       | % within On an<br>average, how<br>many neuraxial<br>procedures for<br>labor analgesia do<br>you perform per<br>week? | 27.2%                                              | 100.0% |
|                                                                                                             |       | Adjusted Residual                                                                                                    | .3                                                 |        |
|                                                                                                             | 2- 5  | Count                                                                                                                | 89                                                 | 342    |
|                                                                                                             |       | % within On an<br>average, how<br>many neuraxial<br>procedures for<br>labor analgesia do<br>you perform per<br>week? | 26.0%                                              | 100.0% |
|                                                                                                             |       | Adjusted Residual                                                                                                    | -.3                                                |        |
|                                                                                                             | 6- 10 | Count                                                                                                                | 57                                                 | 206    |
|                                                                                                             |       | % within On an<br>average, how<br>many neuraxial<br>procedures for<br>labor analgesia do<br>you perform per<br>week? | 27.7%                                              | 100.0% |
|                                                                                                             |       | Adjusted Residual                                                                                                    | .4                                                 |        |

Crosstab

|       |                                                                                                                                      | What would be your single most important reason for allowing a patient's visitor in the room during placement of neuraxial labor ... |                                                               |                                                                |
|-------|--------------------------------------------------------------------------------------------------------------------------------------|--------------------------------------------------------------------------------------------------------------------------------------|---------------------------------------------------------------|----------------------------------------------------------------|
|       |                                                                                                                                      | It would likely reduce patient's anxiety                                                                                             | It would likely reduce visitor's anxiety (for e. g. if visito | Visitor's assistance needed (for e. g. if visitor were a doula |
| > 10  | Count<br>% within On an average, how many neuraxial procedures for labor analgesia do you perform per week?<br><br>Adjusted Residual | 135<br><br>67.2%<br><br>.8                                                                                                           | 5<br><br>2.5%<br><br>-1.9                                     | 10<br><br>5.0%<br><br>1.0                                      |
| Total | Count<br>% within On an average, how many neuraxial procedures for labor analgesia do you perform per week?                          | 629<br><br>64.6%                                                                                                                     | 49<br><br>5.0%                                                | 37<br><br>3.8%                                                 |

Crosstab

|       |                                                                                                                                      | What would be your single most important ... | Total             |
|-------|--------------------------------------------------------------------------------------------------------------------------------------|----------------------------------------------|-------------------|
|       |                                                                                                                                      | To fulfill patient's request                 |                   |
| > 10  | Count<br>% within On an average, how many neuraxial procedures for labor analgesia do you perform per week?<br><br>Adjusted Residual | 51<br><br>25.4%<br><br>-.4                   | 201<br><br>100.0% |
| Total | Count<br>% within On an average, how many neuraxial procedures for labor analgesia do you perform per week?                          | 258<br><br>26.5%                             | 973<br><br>100.0% |

### Chi-Square Tests

|                              | Value               | df | Asymp. Sig. (2-sided) |
|------------------------------|---------------------|----|-----------------------|
| Pearson Chi-Square           | 16.520 <sup>a</sup> | 9  | .057                  |
| Likelihood Ratio             | 15.990              | 9  | .067                  |
| Linear-by-Linear Association | .005                | 1  | .945                  |
| N of Valid Cases             | 973                 |    |                       |

a. 0 cells (0.0%) have expected count less than 5. The minimum expected count is 7.64.

### Bar Chart

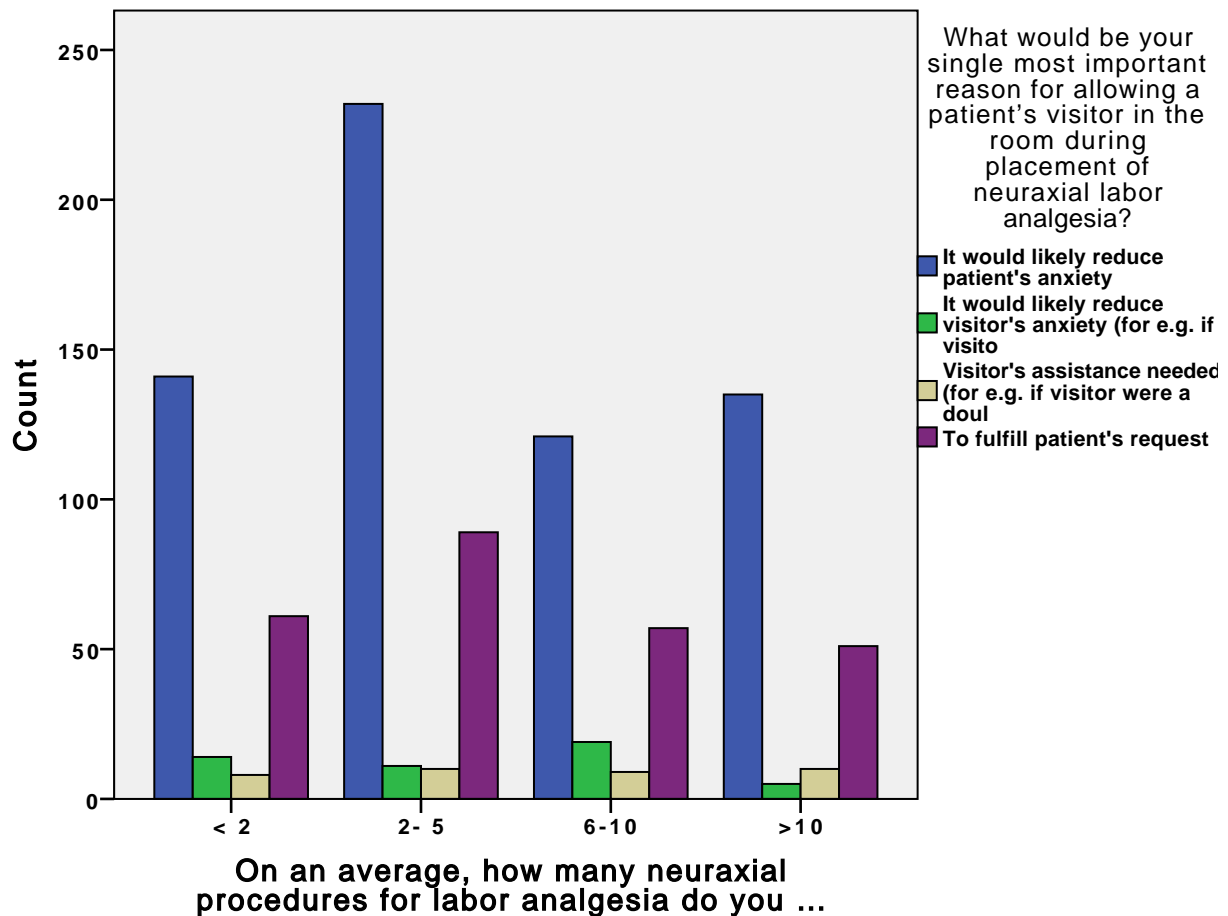

On an average, how many neuraxial procedures for labor analgesia do you perform per week? \* How often has another non anesthesia member of the labor and delivery team (for example obstetrician or nurse) attempted to influence your decision to have a visitor present during placement of neuraxial labor analgesia?



Crosstab

|                                                                                           |       |                                                                                                    | How often has another non anesthesia member of the labor and delivery team (for example obstetrician or nurse) attempted to influence your decision to have a visitor present during placement of neuraxial labor analgesia? |                           |              |
|-------------------------------------------------------------------------------------------|-------|----------------------------------------------------------------------------------------------------|------------------------------------------------------------------------------------------------------------------------------------------------------------------------------------------------------------------------------|---------------------------|--------------|
|                                                                                           |       |                                                                                                    | Rarely (< 5 %)                                                                                                                                                                                                               | Occasionally (5 % - 40 %) | Often > 40 % |
| On an average, how many neuraxial procedures for labor analgesia do you perform per week? | < 2   | Count                                                                                              | 160                                                                                                                                                                                                                          | 43                        | 21           |
|                                                                                           |       | % within On an average, how many neuraxial procedures for labor analgesia do you perform per week? | 71.4%                                                                                                                                                                                                                        | 19.2%                     | 9.4%         |
|                                                                                           |       | Adjusted Residual                                                                                  | -.9                                                                                                                                                                                                                          | .5                        | .7           |
| On an average, how many neuraxial procedures for labor analgesia do you perform per week? | 2- 5  | Count                                                                                              | 263                                                                                                                                                                                                                          | 57                        | 22           |
|                                                                                           |       | % within On an average, how many neuraxial procedures for labor analgesia do you perform per week? | 76.9%                                                                                                                                                                                                                        | 16.7%                     | 6.4%         |
|                                                                                           |       | Adjusted Residual                                                                                  | 1.7                                                                                                                                                                                                                          | -.8                       | -1.5         |
| On an average, how many neuraxial procedures for labor analgesia do you perform per week? | 6- 10 | Count                                                                                              | 149                                                                                                                                                                                                                          | 42                        | 15           |
|                                                                                           |       | % within On an average, how many neuraxial procedures for labor analgesia do you perform per week? | 72.3%                                                                                                                                                                                                                        | 20.4%                     | 7.3%         |
|                                                                                           |       | Adjusted Residual                                                                                  | -.5                                                                                                                                                                                                                          | 1.0                       | -.6          |

Crosstab

|                                                                                           |        |                                                                                                                                  | Total             |
|-------------------------------------------------------------------------------------------|--------|----------------------------------------------------------------------------------------------------------------------------------|-------------------|
| On an average, how many neuraxial procedures for labor analgesia do you perform per week? | < 2    | Count<br>% within On an average, how many neuraxial procedures for labor analgesia do you perform per week?<br>Adjusted Residual | 224<br><br>100.0% |
|                                                                                           | 2- 5   | Count<br>% within On an average, how many neuraxial procedures for labor analgesia do you perform per week?<br>Adjusted Residual | 342<br><br>100.0% |
|                                                                                           | 6 - 10 | Count<br>% within On an average, how many neuraxial procedures for labor analgesia do you perform per week?<br>Adjusted Residual | 206<br><br>100.0% |

Crosstab

|       |                                                                                                    | How often has another non anesthesia member of the labor and delivery team (for example obstetrician or nurse) attempted to influence your decision to have a visitor present during placement of neuraxial labor analgesia? |                           |              |
|-------|----------------------------------------------------------------------------------------------------|------------------------------------------------------------------------------------------------------------------------------------------------------------------------------------------------------------------------------|---------------------------|--------------|
|       |                                                                                                    | Rarely (< 5 %)                                                                                                                                                                                                               | Occasionally (5 % - 40 %) | Often > 40 % |
| > 10  | Count                                                                                              | 145                                                                                                                                                                                                                          | 34                        | 22           |
|       | % within On an average, how many neuraxial procedures for labor analgesia do you perform per week? | 72.1%                                                                                                                                                                                                                        | 16.9%                     | 10.9%        |
|       | Adjusted Residual                                                                                  | -.6                                                                                                                                                                                                                          | -.5                       | 1.6          |
| Total | Count                                                                                              | 717                                                                                                                                                                                                                          | 176                       | 80           |
|       | % within On an average, how many neuraxial procedures for labor analgesia do you perform per week? | 73.7%                                                                                                                                                                                                                        | 18.1%                     | 8.2%         |

Crosstab

|       |                                                                                                    |        |
|-------|----------------------------------------------------------------------------------------------------|--------|
|       |                                                                                                    | Total  |
| > 10  | Count                                                                                              | 201    |
|       | % within On an average, how many neuraxial procedures for labor analgesia do you perform per week? | 100.0% |
|       | Adjusted Residual                                                                                  |        |
| Total | Count                                                                                              | 973    |
|       | % within On an average, how many neuraxial procedures for labor analgesia do you perform per week? | 100.0% |

# Chi-Square Tests

|                              | Value              | df | Asymp. Sig. (2-sided) |
|------------------------------|--------------------|----|-----------------------|
| Pearson Chi-Square           | 5.769 <sup>a</sup> | 6  | .450                  |
| Likelihood Ratio             | 5.681              | 6  | .460                  |
| Linear-by-Linear Association | .255               | 1  | .613                  |
| N of Valid Cases             | 973                |    |                       |

a. 0 cells (0.0%) have expected count less than 5. The minimum expected count is 16.53.

## Bar Chart

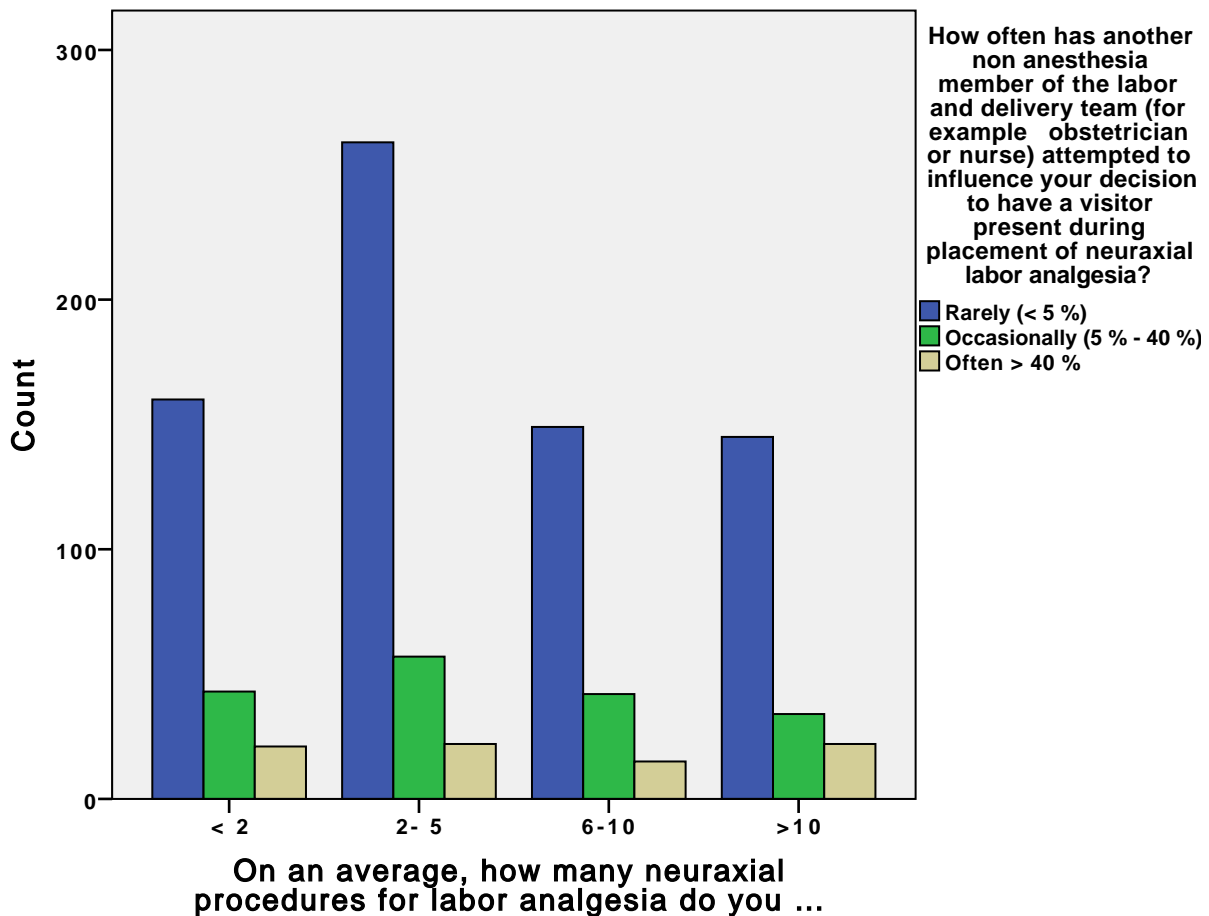

On an average, how many neuraxial procedures for labor analgesia do you perform per week? \* How often has another non anesthesia member of the labor and delivery team (for example obstetrician or nurse) attempted to influence your decision to NOT have a visitor present during placement of neuraxial labor analgesia?

Crosstab

|                                                                                           |       |                                                                                                    | How often has another non anesthesia member of the labor and delivery team (for example obstetrician or nurse) attempted to influence your decision to NOT have a visitor present during placement of neuraxial labor analgesia? |                       |              |
|-------------------------------------------------------------------------------------------|-------|----------------------------------------------------------------------------------------------------|----------------------------------------------------------------------------------------------------------------------------------------------------------------------------------------------------------------------------------|-----------------------|--------------|
|                                                                                           |       |                                                                                                    | Rarely < 5 %                                                                                                                                                                                                                     | Occasionally 5 - 40 % | Often > 40 % |
| On an average, how many neuraxial procedures for labor analgesia do you perform per week? | < 2   | Count                                                                                              | 65                                                                                                                                                                                                                               | 9                     | 3            |
|                                                                                           |       | % within On an average, how many neuraxial procedures for labor analgesia do you perform per week? | 84.4%                                                                                                                                                                                                                            | 11.7%                 | 3.9%         |
|                                                                                           |       | Adjusted Residual                                                                                  | 1.4                                                                                                                                                                                                                              | -1.1                  | -.7          |
|                                                                                           | 2- 5  | Count                                                                                              | 72                                                                                                                                                                                                                               | 9                     | 7            |
|                                                                                           |       | % within On an average, how many neuraxial procedures for labor analgesia do you perform per week? | 81.8%                                                                                                                                                                                                                            | 10.2%                 | 8.0%         |
|                                                                                           |       | Adjusted Residual                                                                                  | .9                                                                                                                                                                                                                               | -1.7                  | 1.1          |
|                                                                                           | 6- 10 | Count                                                                                              | 49                                                                                                                                                                                                                               | 16                    | 5            |
|                                                                                           |       | % within On an average, how many neuraxial procedures for labor analgesia do you perform per week? | 70.0%                                                                                                                                                                                                                            | 22.9%                 | 7.1%         |
|                                                                                           |       | Adjusted Residual                                                                                  | -2.0                                                                                                                                                                                                                             | 1.8                   | .6           |

Crosstab

|                                                                                           |        |                                                                                                                                  | Total            |
|-------------------------------------------------------------------------------------------|--------|----------------------------------------------------------------------------------------------------------------------------------|------------------|
| On an average, how many neuraxial procedures for labor analgesia do you perform per week? | < 2    | Count<br>% within On an average, how many neuraxial procedures for labor analgesia do you perform per week?<br>Adjusted Residual | 77<br><br>100.0% |
|                                                                                           | 2- 5   | Count<br>% within On an average, how many neuraxial procedures for labor analgesia do you perform per week?<br>Adjusted Residual | 88<br><br>100.0% |
|                                                                                           | 6 - 10 | Count<br>% within On an average, how many neuraxial procedures for labor analgesia do you perform per week?<br>Adjusted Residual | 70<br><br>100.0% |

Crosstab

|       |                                                                                                    | How often has another non anesthesia member of the labor and delivery team (for example obstetrician or nurse) attempted to influence your decision to NOT have a visitor present during placement of neuraxial labor analgesia? |                       |              |
|-------|----------------------------------------------------------------------------------------------------|----------------------------------------------------------------------------------------------------------------------------------------------------------------------------------------------------------------------------------|-----------------------|--------------|
|       |                                                                                                    | Rarely < 5 %                                                                                                                                                                                                                     | Occasionally 5 - 40 % | Often > 40 % |
| > 10  | Count                                                                                              | 67                                                                                                                                                                                                                               | 17                    | 3            |
|       | % within On an average, how many neuraxial procedures for labor analgesia do you perform per week? | 77.0%                                                                                                                                                                                                                            | 19.5%                 | 3.4%         |
|       | Adjusted Residual                                                                                  | -.4                                                                                                                                                                                                                              | 1.1                   | -1.0         |
| Total | Count                                                                                              | 253                                                                                                                                                                                                                              | 51                    | 18           |
|       | % within On an average, how many neuraxial procedures for labor analgesia do you perform per week? | 78.6%                                                                                                                                                                                                                            | 15.8%                 | 5.6%         |

Crosstab

|       |                                                                                                    |        |
|-------|----------------------------------------------------------------------------------------------------|--------|
|       |                                                                                                    | Total  |
| > 10  | Count                                                                                              | 87     |
|       | % within On an average, how many neuraxial procedures for labor analgesia do you perform per week? | 100.0% |
|       | Adjusted Residual                                                                                  |        |
| Total | Count                                                                                              | 322    |
|       | % within On an average, how many neuraxial procedures for labor analgesia do you perform per week? | 100.0% |

### Chi-Square Tests

|                              | Value              | df | Asymp. Sig. (2-sided) |
|------------------------------|--------------------|----|-----------------------|
| Pearson Chi-Square           | 8.942 <sup>a</sup> | 6  | .177                  |
| Likelihood Ratio             | 9.012              | 6  | .173                  |
| Linear-by-Linear Association | 1.115              | 1  | .291                  |
| N of Valid Cases             | 322                |    |                       |

a. 4 cells (33.3%) have expected count less than 5. The minimum expected count is 3.91.

### Bar Chart

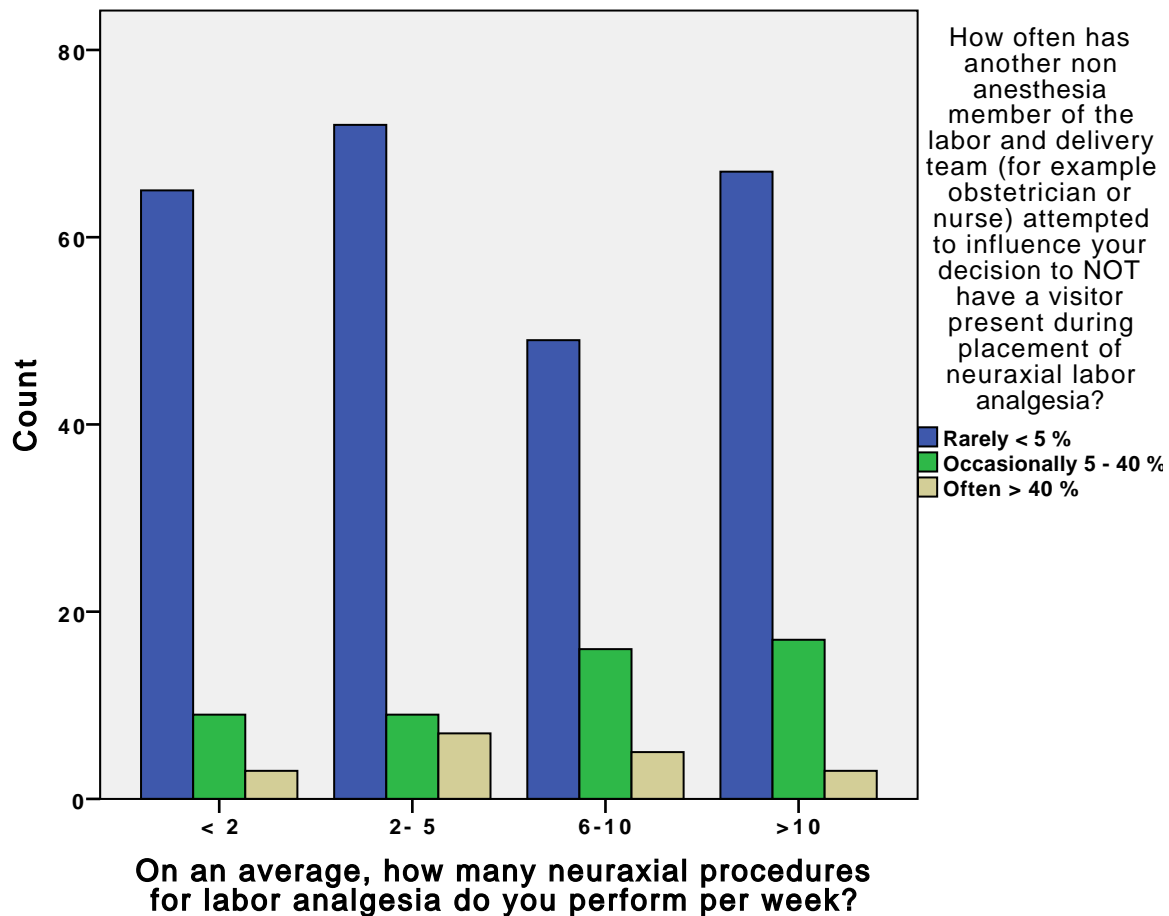

On an average, how many neuraxial procedures for labor analgesia do you perform per week? \* What would be your single most important reason for NOT allowing a patient's visitor in the room during placement of neuraxial labor analgesia?



Crosstab

|                                                                                           |     |                                                                                                    | What would be your single most important reason for NOT allowing a patient's visitor in the room during placement of neuraxial labor . |                                                               |                                                             |
|-------------------------------------------------------------------------------------------|-----|----------------------------------------------------------------------------------------------------|----------------------------------------------------------------------------------------------------------------------------------------|---------------------------------------------------------------|-------------------------------------------------------------|
|                                                                                           |     |                                                                                                    | Increase in anesthesiologist's stress                                                                                                  | Possible interference by visitor (for e.g. comments made if d | Concern about visitor (for e.g. passing out or not being ab |
| On an average, how many neuraxial procedures for labor analgesia do you perform per week? | < 2 | Count                                                                                              | 13                                                                                                                                     | 37                                                            | 20                                                          |
|                                                                                           |     | % within On an average, how many neuraxial procedures for labor analgesia do you perform per week? | 16.9%                                                                                                                                  | 48.1%                                                         | 26.0%                                                       |
|                                                                                           |     | Adjusted Residual                                                                                  | 3.8                                                                                                                                    | -.1                                                           | -1.5                                                        |
| 2- 5                                                                                      |     | Count                                                                                              | 3                                                                                                                                      | 46                                                            | 28                                                          |
|                                                                                           |     | % within On an average, how many neuraxial procedures for labor analgesia do you perform per week? | 3.4%                                                                                                                                   | 52.3%                                                         | 31.8%                                                       |
|                                                                                           |     | Adjusted Residual                                                                                  | -1.6                                                                                                                                   | .8                                                            | -.3                                                         |
| 6- 10                                                                                     |     | Count                                                                                              | 2                                                                                                                                      | 35                                                            | 26                                                          |
|                                                                                           |     | % within On an average, how many neuraxial procedures for labor analgesia do you perform per week? | 2.9%                                                                                                                                   | 50.0%                                                         | 37.1%                                                       |
|                                                                                           |     | Adjusted Residual                                                                                  | -1.6                                                                                                                                   | .3                                                            | .9                                                          |

Crosstab

|                                                                                                             |       |                                                                                                                      | What would be<br>your single<br>most important ... |        |
|-------------------------------------------------------------------------------------------------------------|-------|----------------------------------------------------------------------------------------------------------------------|----------------------------------------------------|--------|
|                                                                                                             |       |                                                                                                                      | Medico-legal<br>concerns                           | Total  |
| On an average,<br>how many<br>neuraxial<br>procedures for<br>labor analgesia do<br>you perform per<br>week? | < 2   | Count                                                                                                                | 7                                                  | 77     |
|                                                                                                             |       | % within On an<br>average, how<br>many neuraxial<br>procedures for<br>labor analgesia do<br>you perform per<br>week? | 9.1%                                               | 100.0% |
|                                                                                                             |       | Adjusted Residual                                                                                                    | -.8                                                |        |
|                                                                                                             |       |                                                                                                                      |                                                    |        |
|                                                                                                             | 2- 5  | Count                                                                                                                | 11                                                 | 88     |
|                                                                                                             |       | % within On an<br>average, how<br>many neuraxial<br>procedures for<br>labor analgesia do<br>you perform per<br>week? | 12.5%                                              | 100.0% |
|                                                                                                             |       | Adjusted Residual                                                                                                    | .3                                                 |        |
|                                                                                                             |       |                                                                                                                      |                                                    |        |
|                                                                                                             | 6- 10 | Count                                                                                                                | 7                                                  | 70     |
|                                                                                                             |       | % within On an<br>average, how<br>many neuraxial<br>procedures for<br>labor analgesia do<br>you perform per<br>week? | 10.0%                                              | 100.0% |
|                                                                                                             |       | Adjusted Residual                                                                                                    | -.4                                                |        |
|                                                                                                             |       |                                                                                                                      |                                                    |        |

Crosstab

|       |                                                                                                                                      | What would be your single most important reason for NOT allowing a patient's visitor in the room during placement of neuraxial labor . |                                                               |                                                             |
|-------|--------------------------------------------------------------------------------------------------------------------------------------|----------------------------------------------------------------------------------------------------------------------------------------|---------------------------------------------------------------|-------------------------------------------------------------|
|       |                                                                                                                                      | Increase in anesthesiologist's stress                                                                                                  | Possible interference by visitor (for e.g. comments made if d | Concern about visitor (for e.g. passing out or not being ab |
| > 10  | Count<br>% within On an average, how many neuraxial procedures for labor analgesia do you perform per week?<br><br>Adjusted Residual | 5<br><br>5.7%<br><br>-.6                                                                                                               | 38<br><br>43.7%<br><br>-1.0                                   | 32<br><br>36.8%<br><br>.9                                   |
| Total | Count<br>% within On an average, how many neuraxial procedures for labor analgesia do you perform per week?                          | 23<br><br>7.1%                                                                                                                         | 156<br><br>48.4%                                              | 106<br><br>32.9%                                            |

Crosstab

|       |                                                                                                                                                        | What would be<br>your single<br>most important ... |                   |
|-------|--------------------------------------------------------------------------------------------------------------------------------------------------------|----------------------------------------------------|-------------------|
|       |                                                                                                                                                        | Medico-legal<br>concerns                           | Total             |
| > 10  | Count<br>% within On an<br>average, how<br>many neuraxial<br>procedures for<br>labor analgesia do<br>you perform per<br>week?<br><br>Adjusted Residual | 12<br><br>13.8%<br><br>.8                          | 87<br><br>100.0%  |
| Total | Count<br>% within On an<br>average, how<br>many neuraxial<br>procedures for<br>labor analgesia do<br>you perform per<br>week?                          | 37<br><br>11.5%                                    | 322<br><br>100.0% |

Chi-Square Tests

|                                 | Value               | df | Asymp. Sig.<br>(2-sided) |
|---------------------------------|---------------------|----|--------------------------|
| Pearson Chi-Square              | 17.629 <sup>a</sup> | 9  | .040                     |
| Likelihood Ratio                | 15.811              | 9  | .071                     |
| Linear-by-Linear<br>Association | 5.536               | 1  | .019                     |
| N of Valid Cases                | 322                 |    |                          |

a. 0 cells (0.0%) have expected count less than 5. The minimum expected count is 5.00.

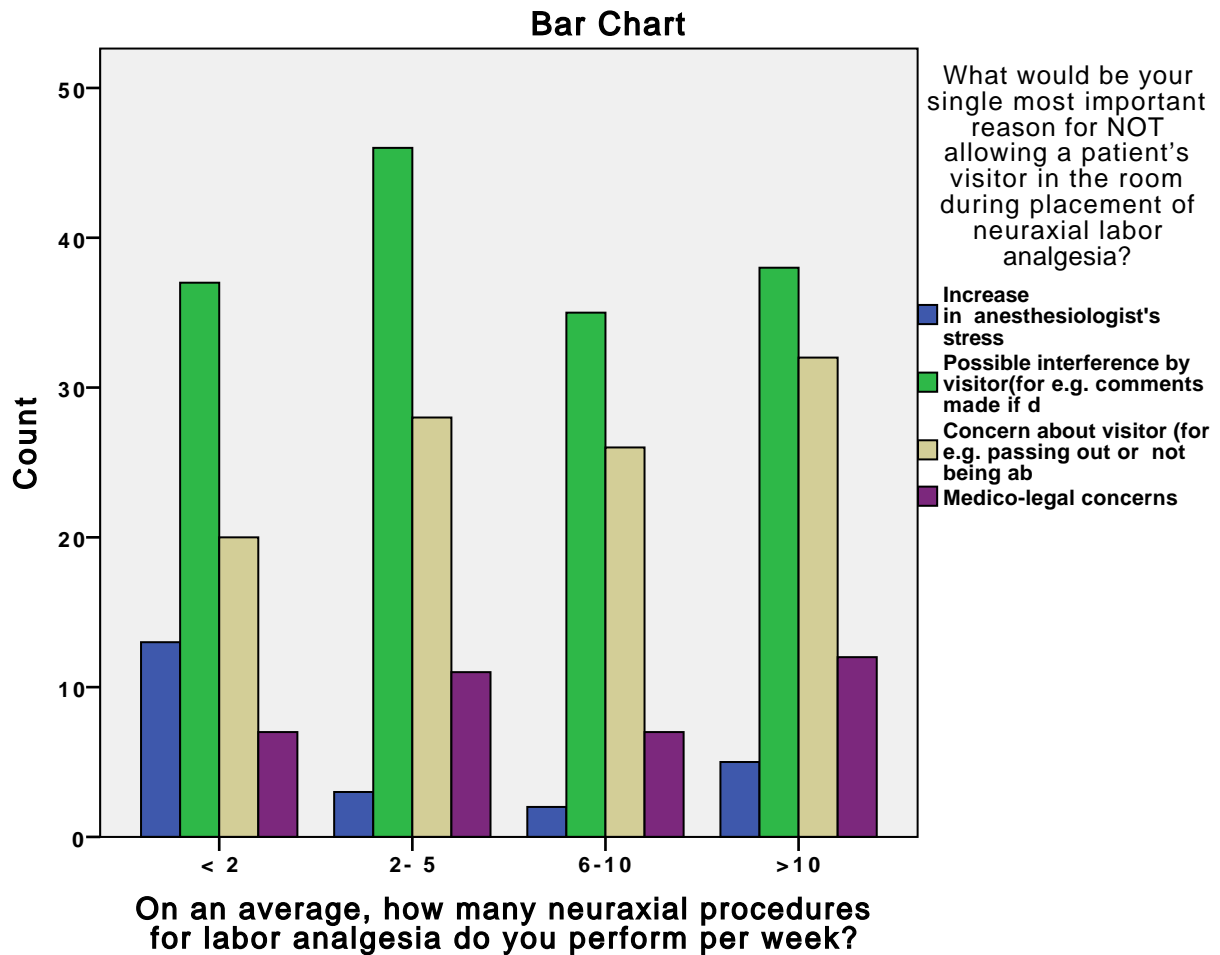

**How many years have you been practicing as an attending anesthesiologist? \* What is your preferred technique for neuraxial labor analgesia in an otherwise healthy parturient?**

Crosstab

|                                                                           |            |                                                                                                                      | What is your preferred technique for neuraxial labor analgesia in an otherwise healthy parturient? |                                    | Total              |
|---------------------------------------------------------------------------|------------|----------------------------------------------------------------------------------------------------------------------|----------------------------------------------------------------------------------------------------|------------------------------------|--------------------|
|                                                                           |            |                                                                                                                      | Epidural analgesia                                                                                 | Combined spinal epidural analgesia |                    |
| How many years have you been practicing as an attending anesthesiologist? | < 2 years  | Count<br>% within How many years have you been practicing as an attending anesthesiologist?<br><br>Adjusted Residual | 107<br><br>78.1%<br><br>.0                                                                         | 30<br><br>21.9%<br><br>.0          | 137<br><br>100.0%  |
|                                                                           | 2-5 years  | Count<br>% within How many years have you been practicing as an attending anesthesiologist?<br><br>Adjusted Residual | 192<br><br>79.7%<br><br>.7                                                                         | 49<br><br>20.3%<br><br>-.7         | 241<br><br>100.0%  |
|                                                                           | 6-15 years | Count<br>% within How many years have you been practicing as an attending anesthesiologist?<br><br>Adjusted Residual | 264<br><br>78.1%<br><br>.0                                                                         | 74<br><br>21.9%<br><br>.0          | 338<br><br>100.0%  |
|                                                                           | >15 years  | Count<br>% within How many years have you been practicing as an attending anesthesiologist?<br><br>Adjusted Residual | 452<br><br>77.3%<br><br>-.6                                                                        | 133<br><br>22.7%<br><br>.6         | 585<br><br>100.0%  |
|                                                                           | Total      | Count<br>% within How many years have you been practicing as an attending anesthesiologist?                          | 1015<br><br>78.0%                                                                                  | 286<br><br>22.0%                   | 1301<br><br>100.0% |

# Chi-Square Tests

|                              | Value             | df | Asymp. Sig. (2-sided) |
|------------------------------|-------------------|----|-----------------------|
| Pearson Chi-Square           | .578 <sup>a</sup> | 3  | .901                  |
| Likelihood Ratio             | .584              | 3  | .900                  |
| Linear-by-Linear Association | .315              | 1  | .574                  |
| N of Valid Cases             | 1301              |    |                       |

a. 0 cells (0.0%) have expected count less than 5. The minimum expected count is 30.12.

## Bar Chart

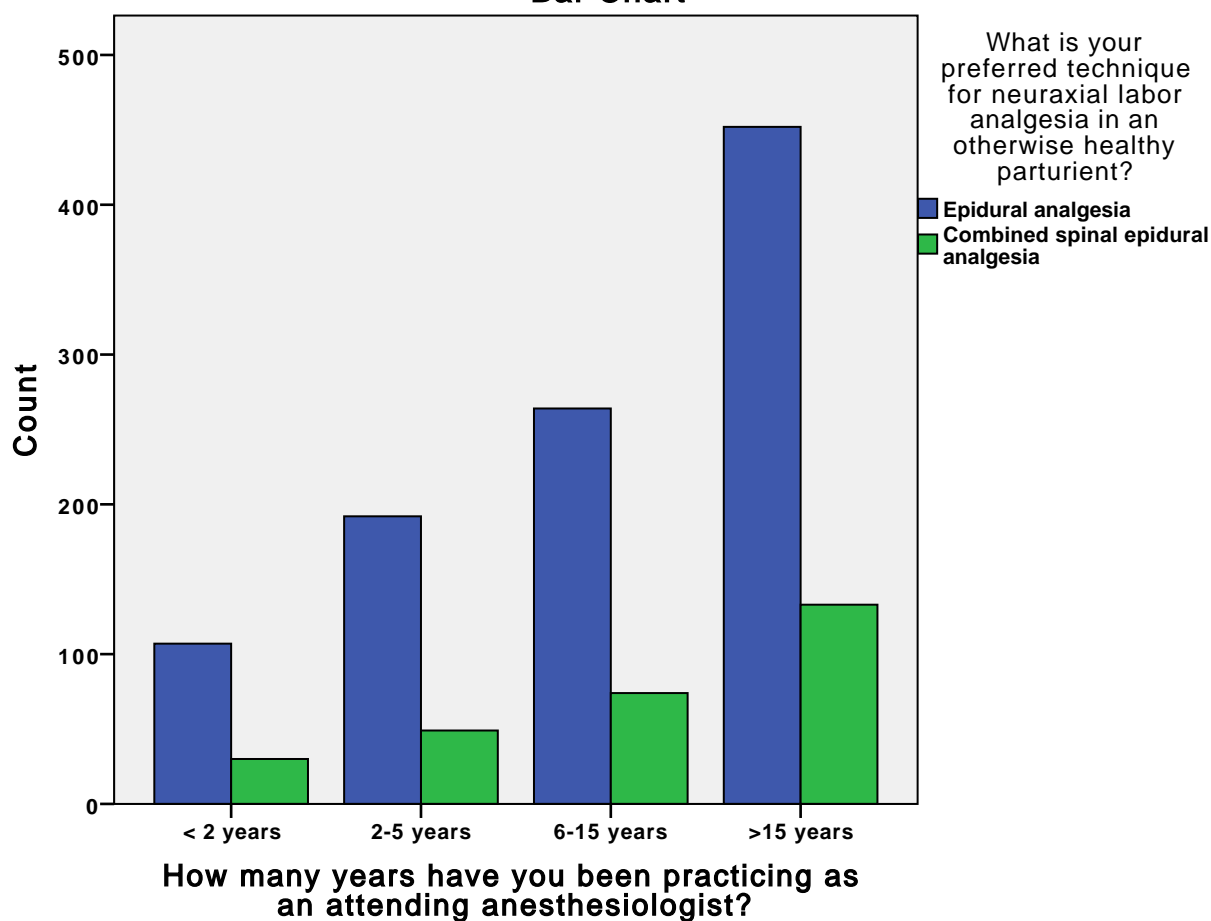

How many years have you been practicing as an attending anest hesiologist? \* Does your practice or hospital have a written policy regarding allowing a patient's visitor in the room during placem ent of neuraxial labor analgesia?

Crosstab

|                                                                           |            |                                                                                    | Does your practice or hospital have a written policy regarding allowing a patient's visitor in the room during placement of neuraxial labor . |                                                        |                          |
|---------------------------------------------------------------------------|------------|------------------------------------------------------------------------------------|-----------------------------------------------------------------------------------------------------------------------------------------------|--------------------------------------------------------|--------------------------|
|                                                                           |            |                                                                                    | Yes, a written policy exists - Allows visitors                                                                                                | Yes, a written policy exists - Does not allow visitors | No written policy exists |
| How many years have you been practicing as an attending anesthesiologist? | < 2 years  | Count                                                                              | 29                                                                                                                                            | 8                                                      | 44                       |
|                                                                           |            | % within How many years have you been practicing as an attending anesthesiologist? | 21.2%                                                                                                                                         | 5.8%                                                   | 32.1%                    |
|                                                                           |            | Adjusted Residual                                                                  | - .4                                                                                                                                          | -1.0                                                   | -1.9                     |
|                                                                           | 2-5 years  | Count                                                                              | 41                                                                                                                                            | 17                                                     | 84                       |
|                                                                           |            | % within How many years have you been practicing as an attending anesthesiologist? | 17.0%                                                                                                                                         | 7.1%                                                   | 34.9%                    |
|                                                                           |            | Adjusted Residual                                                                  | -2.3                                                                                                                                          | -.6                                                    | -1.6                     |
|                                                                           | 6-15 years | Count                                                                              | 68                                                                                                                                            | 28                                                     | 140                      |
|                                                                           |            | % within How many years have you been practicing as an attending anesthesiologist? | 20.1%                                                                                                                                         | 8.3%                                                   | 41.4%                    |
|                                                                           |            | Adjusted Residual                                                                  | -1.2                                                                                                                                          | .2                                                     | .9                       |
|                                                                           | >15 years  | Count                                                                              | 155                                                                                                                                           | 52                                                     | 245                      |
|                                                                           |            | % within How many years have you been practicing as an attending anesthesiologist? | 26.5%                                                                                                                                         | 8.9%                                                   | 41.9%                    |
|                                                                           |            | Adjusted Residual                                                                  | 3.1                                                                                                                                           | 1.0                                                    | 1.6                      |
| Total                                                                     |            | Count                                                                              | 293                                                                                                                                           | 105                                                    | 513                      |
|                                                                           |            | % within How many years have you been practicing as an attending anesthesiologist? | 22.5%                                                                                                                                         | 8.1%                                                   | 39.4%                    |



Crosstab

|                                                                           |            |                                                                                    | Does your practice or hospital have a ... |        |
|---------------------------------------------------------------------------|------------|------------------------------------------------------------------------------------|-------------------------------------------|--------|
|                                                                           |            |                                                                                    |                                           |        |
|                                                                           |            |                                                                                    | I do not know                             | Total  |
| How many years have you been practicing as an attending anesthesiologist? | < 2 years  | Count                                                                              | 56                                        | 137    |
|                                                                           |            | % within How many years have you been practicing as an attending anesthesiologist? | 40.9%                                     | 100.0% |
|                                                                           |            | Adjusted Residual                                                                  | 2.9                                       |        |
|                                                                           | 2-5 years  | Count                                                                              | 99                                        | 241    |
|                                                                           |            | % within How many years have you been practicing as an attending anesthesiologist? | 41.1%                                     | 100.0% |
|                                                                           |            | Adjusted Residual                                                                  | 4.2                                       |        |
|                                                                           | 6-15 years | Count                                                                              | 102                                       | 338    |
|                                                                           |            | % within How many years have you been practicing as an attending anesthesiologist? | 30.2%                                     | 100.0% |
|                                                                           |            | Adjusted Residual                                                                  | .1                                        |        |
|                                                                           | >15 years  | Count                                                                              | 133                                       | 585    |
|                                                                           |            | % within How many years have you been practicing as an attending anesthesiologist? | 22.7%                                     | 100.0% |
|                                                                           |            | Adjusted Residual                                                                  | -5.2                                      |        |
| Total                                                                     |            | Count                                                                              | 390                                       | 1301   |
|                                                                           |            | % within How many years have you been practicing as an attending anesthesiologist? | 30.0%                                     | 100.0% |

# Chi-Square Tests

|                              | Value               | df | Asymp. Sig. (2-sided) |
|------------------------------|---------------------|----|-----------------------|
| Pearson Chi-Square           | 39.932 <sup>a</sup> | 9  | .000                  |
| Likelihood Ratio             | 39.637              | 9  | .000                  |
| Linear-by-Linear Association | 22.079              | 1  | .000                  |
| N of Valid Cases             | 1301                |    |                       |

a. 0 cells (0.0%) have expected count less than 5. The minimum expected count is 11.06.

## Bar Chart

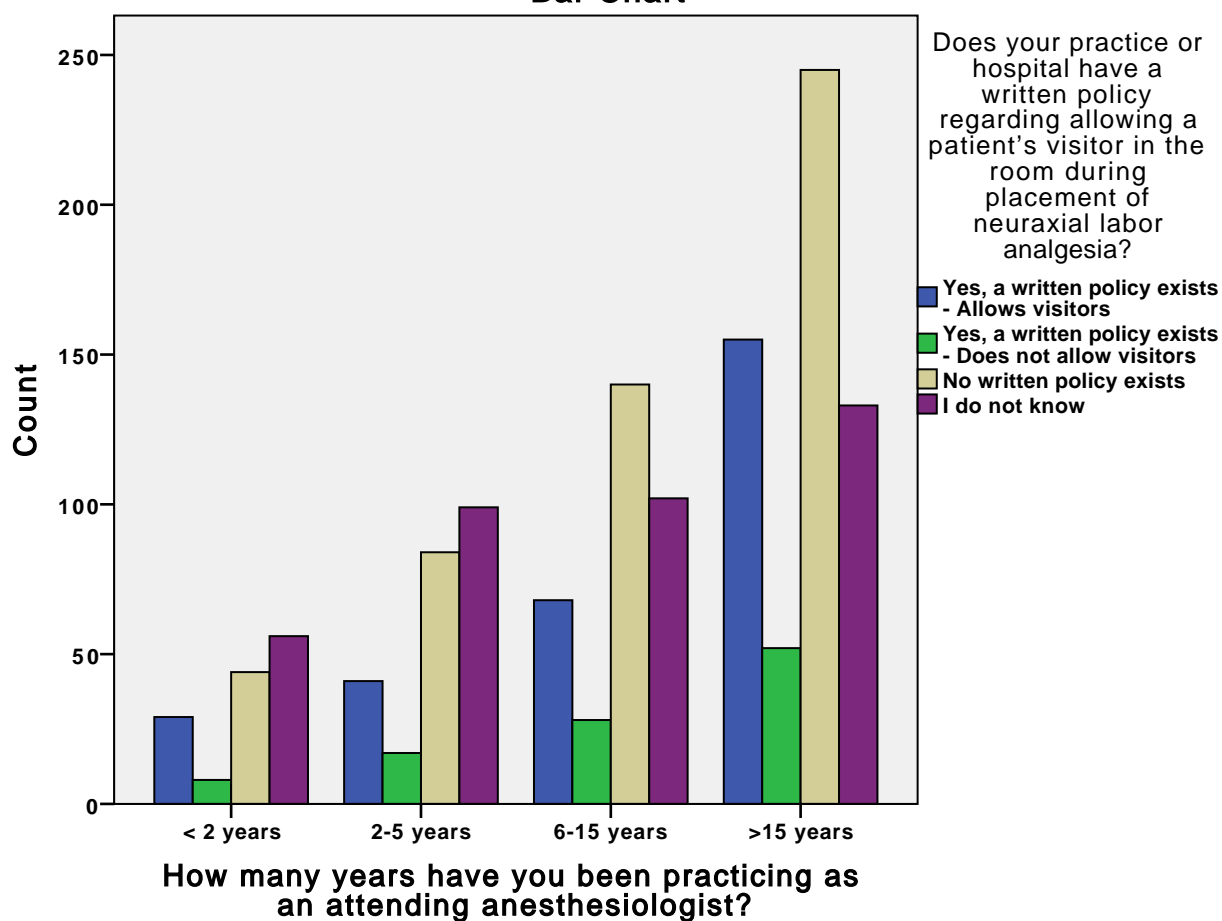

How many years have you been practicing as an attending anest hesiologist? \* If no policy existed, would you be open to allowing a patient's visitor in the room during placement of neuraxial labor analgesia?

Crosstab

|                                                                           |            |                                                                                                                  | If no policy existed, would you be open to allowing a patient's visitor in the room during placement of neuraxial labor analgesia? |                             | Total              |
|---------------------------------------------------------------------------|------------|------------------------------------------------------------------------------------------------------------------|------------------------------------------------------------------------------------------------------------------------------------|-----------------------------|--------------------|
|                                                                           |            |                                                                                                                  | Yes                                                                                                                                | No                          |                    |
| How many years have you been practicing as an attending anesthesiologist? | < 2 years  | Count<br>% within How many years have you been practicing as an attending anesthesiologist?<br>Adjusted Residual | 99<br><br>72.3%<br><br>-.8                                                                                                         | 38<br><br>27.7%<br><br>.8   | 137<br><br>100.0%  |
|                                                                           | 2-5 years  | Count<br>% within How many years have you been practicing as an attending anesthesiologist?<br>Adjusted Residual | 193<br><br>80.1%<br><br>2.0                                                                                                        | 48<br><br>19.9%<br><br>-2.0 | 241<br><br>100.0%  |
|                                                                           | 6-15 years | Count<br>% within How many years have you been practicing as an attending anesthesiologist?<br>Adjusted Residual | 259<br><br>76.6%<br><br>.8                                                                                                         | 79<br><br>23.4%<br><br>-.8  | 338<br><br>100.0%  |
|                                                                           | >15 years  | Count<br>% within How many years have you been practicing as an attending anesthesiologist?<br>Adjusted Residual | 426<br><br>72.8%<br><br>-1.7                                                                                                       | 159<br><br>27.2%<br><br>1.7 | 585<br><br>100.0%  |
| Total                                                                     |            | Count<br>% within How many years have you been practicing as an attending anesthesiologist?                      | 977<br><br>75.1%                                                                                                                   | 324<br><br>24.9%            | 1301<br><br>100.0% |

# Chi-Square Tests

|                              | Value              | df | Asymp. Sig. (2-sided) |
|------------------------------|--------------------|----|-----------------------|
| Pearson Chi-Square           | 5.836 <sup>a</sup> | 3  | .120                  |
| Likelihood Ratio             | 5.959              | 3  | .114                  |
| Linear-by-Linear Association | 1.203              | 1  | .273                  |
| N of Valid Cases             | 1301               |    |                       |

a. 0 cells (0.0%) have expected count less than 5. The minimum expected count is 34.12.

## Bar Chart

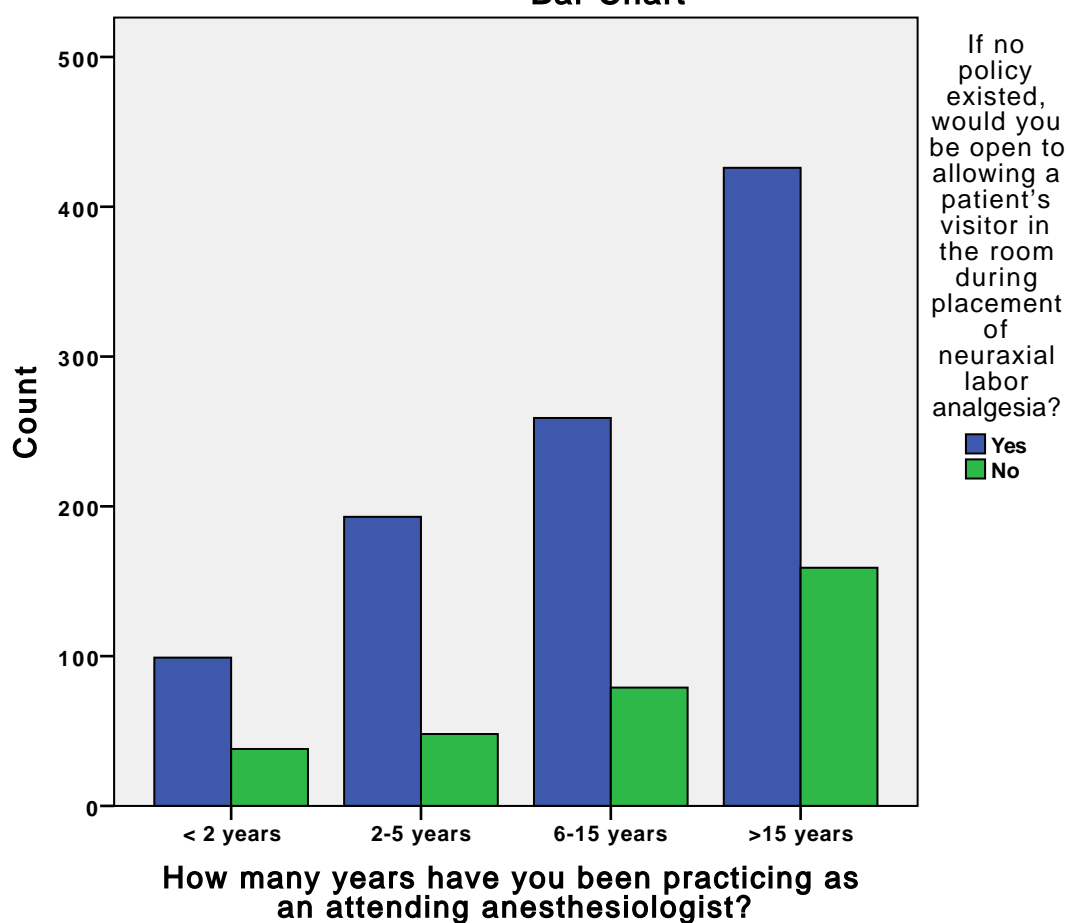

How many years have you been practicing as an attending anest hesiologist? \* If you allowed a visitor in the room during placeme nt of neuraxial labor analgesia, you would want the

Crosstab

|                                                                           |            |                                                                                    | If you allowed a visitor in the room during placement of neuraxial labor analgesia, you would want the |                        |                 |
|---------------------------------------------------------------------------|------------|------------------------------------------------------------------------------------|--------------------------------------------------------------------------------------------------------|------------------------|-----------------|
|                                                                           |            |                                                                                    | Visitor always standing                                                                                | Visitor always sitting | Does not matter |
| How many years have you been practicing as an attending anesthesiologist? | < 2 years  | Count                                                                              | 4                                                                                                      | 78                     | 19              |
|                                                                           |            | % within How many years have you been practicing as an attending anesthesiologist? | 4.0%                                                                                                   | 77.2%                  | 18.8%           |
|                                                                           |            | Adjusted Residual                                                                  | 2.2                                                                                                    | 1.2                    | -1.9            |
|                                                                           | 2-5 years  | Count                                                                              | 3                                                                                                      | 146                    | 42              |
|                                                                           |            | % within How many years have you been practicing as an attending anesthesiologist? | 1.6%                                                                                                   | 76.4%                  | 22.0%           |
|                                                                           |            | Adjusted Residual                                                                  | .2                                                                                                     | 1.5                    | -1.6            |
|                                                                           | 6-15 years | Count                                                                              | 1                                                                                                      | 191                    | 66              |
|                                                                           |            | % within How many years have you been practicing as an attending anesthesiologist? | 0.4%                                                                                                   | 74.0%                  | 25.6%           |
|                                                                           |            | Adjusted Residual                                                                  | -1.7                                                                                                   | .8                     | -.4             |
|                                                                           | >15 years  | Count                                                                              | 6                                                                                                      | 286                    | 131             |
|                                                                           |            | % within How many years have you been practicing as an attending anesthesiologist? | 1.4%                                                                                                   | 67.6%                  | 31.0%           |
|                                                                           |            | Adjusted Residual                                                                  | .0                                                                                                     | -2.7                   | 2.8             |
| Total                                                                     |            | Count                                                                              | 14                                                                                                     | 701                    | 258             |
|                                                                           |            | % within How many years have you been practicing as an attending anesthesiologist? | 1.4%                                                                                                   | 72.0%                  | 26.5%           |

Crosstab

|                                                                           |            |                                                                                                                  | Total             |
|---------------------------------------------------------------------------|------------|------------------------------------------------------------------------------------------------------------------|-------------------|
| How many years have you been practicing as an attending anesthesiologist? | < 2 years  | Count<br>% within How many years have you been practicing as an attending anesthesiologist?<br>Adjusted Residual | 101<br><br>100.0% |
|                                                                           | 2-5 years  | Count<br>% within How many years have you been practicing as an attending anesthesiologist?<br>Adjusted Residual | 191<br><br>100.0% |
|                                                                           | 6-15 years | Count<br>% within How many years have you been practicing as an attending anesthesiologist?<br>Adjusted Residual | 258<br><br>100.0% |
|                                                                           | >15 years  | Count<br>% within How many years have you been practicing as an attending anesthesiologist?<br>Adjusted Residual | 423<br><br>100.0% |
|                                                                           | Total      | Count<br>% within How many years have you been practicing as an attending anesthesiologist?                      | 973<br><br>100.0% |

### Chi-Square Tests

|                              | Value               | df | Asymp. Sig. (2-sided) |
|------------------------------|---------------------|----|-----------------------|
| Pearson Chi-Square           | 15.638 <sup>a</sup> | 6  | .016                  |
| Likelihood Ratio             | 15.191              | 6  | .019                  |
| Linear-by-Linear Association | 10.653              | 1  | .001                  |
| N of Valid Cases             | 973                 |    |                       |

a. 3 cells (25.0%) have expected count less than 5. The minimum expected count is 1.45.

### Bar Chart

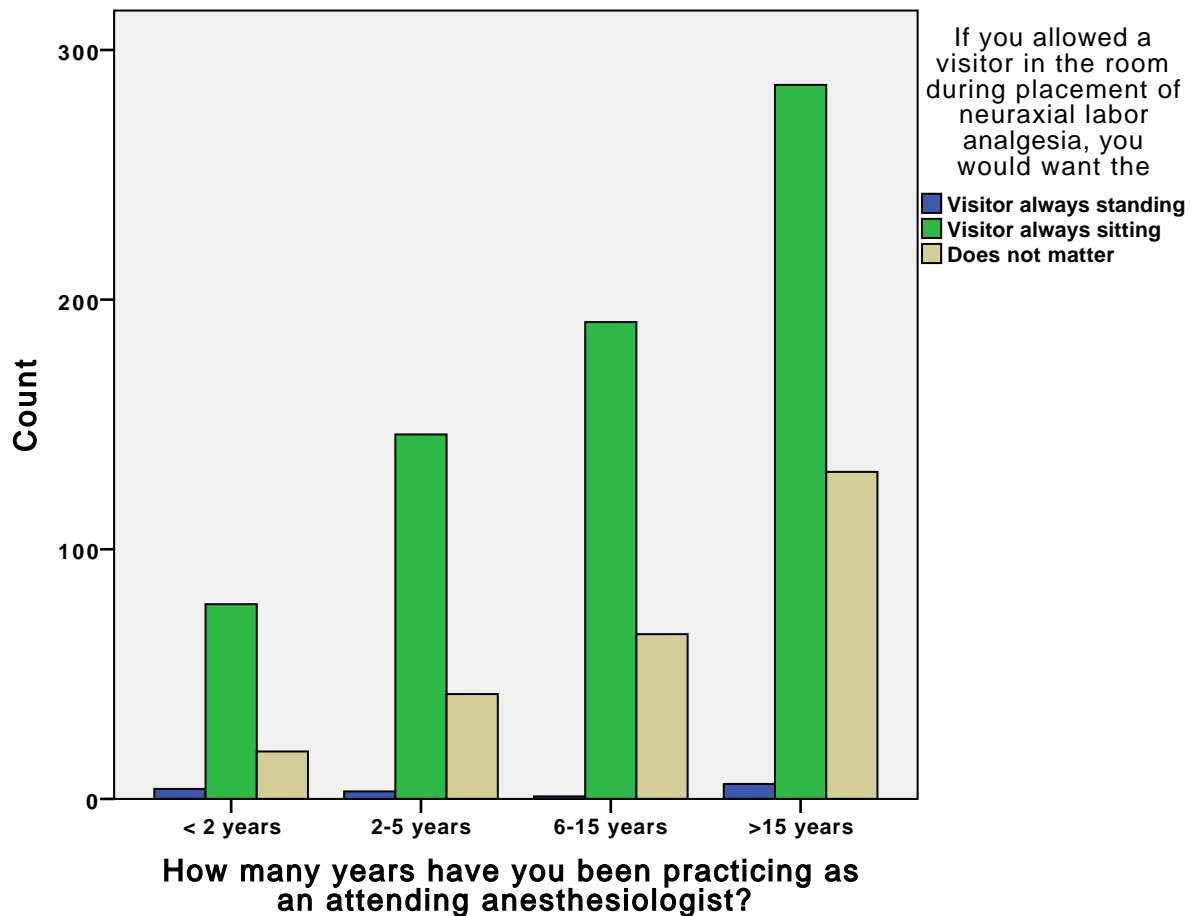

How many years have you been practicing as an attending anesthesiologist? \* If you allowed a visitor in the room during placement of neuraxial labor analgesia, you would want the visitor to be positioned such that,

Crosstab

|                                                                           |            |                                                                                    | If you allowed a visitor in the room during placement of neuraxial labor analgesia, you would want the visitor to be positioned such that, |                                                              |                 |
|---------------------------------------------------------------------------|------------|------------------------------------------------------------------------------------|--------------------------------------------------------------------------------------------------------------------------------------------|--------------------------------------------------------------|-----------------|
|                                                                           |            |                                                                                    | Visitor has no view of procedure (patient is in between anes                                                                               | Visitor has partial view of workspace (but cannot see patien | Does not matter |
| How many years have you been practicing as an attending anesthesiologist? | < 2 years  | Count                                                                              | 66                                                                                                                                         | 21                                                           | 14              |
|                                                                           |            | % within How many years have you been practicing as an attending anesthesiologist? | 65.3%                                                                                                                                      | 20.8%                                                        | 13.9%           |
|                                                                           |            | Adjusted Residual                                                                  | .9                                                                                                                                         | .5                                                           | -1.6            |
|                                                                           | 2-5 years  | Count                                                                              | 132                                                                                                                                        | 33                                                           | 26              |
|                                                                           |            | % within How many years have you been practicing as an attending anesthesiologist? | 69.1%                                                                                                                                      | 17.3%                                                        | 13.6%           |
|                                                                           |            | Adjusted Residual                                                                  | 2.5                                                                                                                                        | -.7                                                          | -2.4            |
|                                                                           | 6-15 years | Count                                                                              | 162                                                                                                                                        | 48                                                           | 48              |
|                                                                           |            | % within How many years have you been practicing as an attending anesthesiologist? | 62.8%                                                                                                                                      | 18.6%                                                        | 18.6%           |
|                                                                           |            | Adjusted Residual                                                                  | .7                                                                                                                                         | -.2                                                          | -.6             |
|                                                                           | >15 years  | Count                                                                              | 234                                                                                                                                        | 83                                                           | 106             |
|                                                                           |            | % within How many years have you been practicing as an attending anesthesiologist? | 55.3%                                                                                                                                      | 19.6%                                                        | 25.1%           |
|                                                                           |            | Adjusted Residual                                                                  | -3.2                                                                                                                                       | .4                                                           | 3.5             |
| Total                                                                     |            | Count                                                                              | 594                                                                                                                                        | 185                                                          | 194             |
|                                                                           |            | % within How many years have you been practicing as an attending anesthesiologist? | 61.0%                                                                                                                                      | 19.0%                                                        | 19.9%           |



**Crosstab**

|                                                                                  |                     |                                                                                                                  |                   |
|----------------------------------------------------------------------------------|---------------------|------------------------------------------------------------------------------------------------------------------|-------------------|
|                                                                                  |                     |                                                                                                                  | <b>Total</b>      |
| <b>How many years have you been practicing as an attending anesthesiologist?</b> | <b>&lt; 2 years</b> | Count<br>% within How many years have you been practicing as an attending anesthesiologist?<br>Adjusted Residual | 101<br><br>100.0% |
|                                                                                  | <b>2-5 years</b>    | Count<br>% within How many years have you been practicing as an attending anesthesiologist?<br>Adjusted Residual | 191<br><br>100.0% |
|                                                                                  | <b>6-15 years</b>   | Count<br>% within How many years have you been practicing as an attending anesthesiologist?<br>Adjusted Residual | 258<br><br>100.0% |
|                                                                                  | <b>&gt;15 years</b> | Count<br>% within How many years have you been practicing as an attending anesthesiologist?<br>Adjusted Residual | 423<br><br>100.0% |
|                                                                                  | <b>Total</b>        | Count<br>% within How many years have you been practicing as an attending anesthesiologist?                      | 973<br><br>100.0% |

### Chi-Square Tests

|                              | Value               | df | Asymp. Sig. (2-sided) |
|------------------------------|---------------------|----|-----------------------|
| Pearson Chi-Square           | 16.815 <sup>a</sup> | 6  | .010                  |
| Likelihood Ratio             | 17.094              | 6  | .009                  |
| Linear-by-Linear Association | 13.638              | 1  | .000                  |
| N of Valid Cases             | 973                 |    |                       |

a. 0 cells (0.0%) have expected count less than 5. The minimum expected count is 19.20.

### Bar Chart

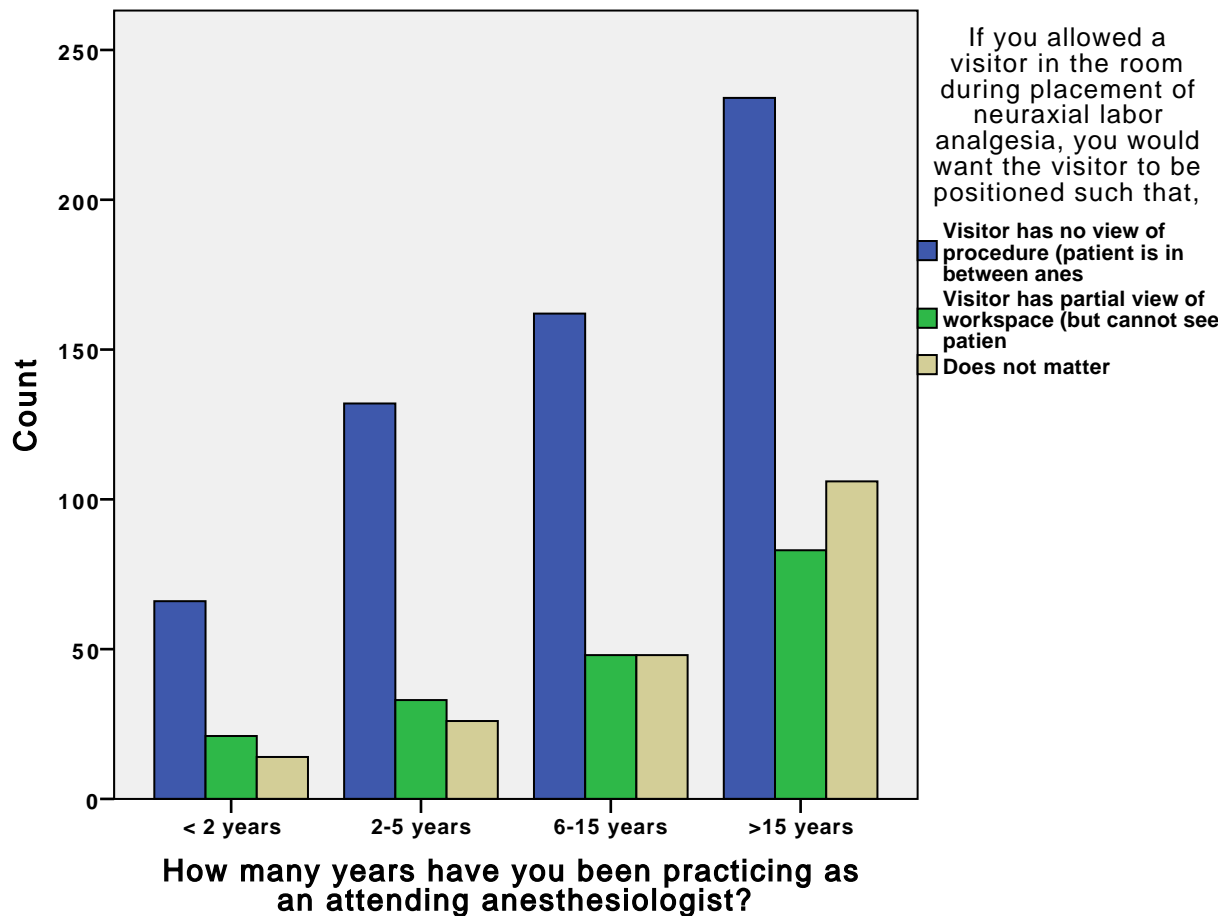

How many years have you been practicing as an attending anest  
hesiologist? \* What would be your single most important reason f  
or allowing a patient's visitor in the room during placement of ne  
uraxial labor analgesia?

Crosstab

|                                                                           |            |                                                                                    | What would be your single most important reason for allowing a patient's visitor in the room during placement of neuraxial labor ... |                                                               |                                                              |
|---------------------------------------------------------------------------|------------|------------------------------------------------------------------------------------|--------------------------------------------------------------------------------------------------------------------------------------|---------------------------------------------------------------|--------------------------------------------------------------|
|                                                                           |            |                                                                                    | It would likely reduce patient's anxiety                                                                                             | It would likely reduce visitor's anxiety (for e. g. if visito | Visitor's assistance needed (for e. g. if visitor were a dou |
| How many years have you been practicing as an attending anesthesiologist? | < 2 years  | Count                                                                              | 72                                                                                                                                   | 8                                                             | 3                                                            |
|                                                                           |            | % within How many years have you been practicing as an attending anesthesiologist? | 71.3%                                                                                                                                | 7.9%                                                          | 3.0%                                                         |
|                                                                           |            | Adjusted Residual                                                                  | 1.5                                                                                                                                  | 1.4                                                           | -.5                                                          |
|                                                                           | 2-5 years  | Count                                                                              | 133                                                                                                                                  | 11                                                            | 8                                                            |
|                                                                           |            | % within How many years have you been practicing as an attending anesthesiologist? | 69.6%                                                                                                                                | 5.8%                                                          | 4.2%                                                         |
|                                                                           |            | Adjusted Residual                                                                  | 1.6                                                                                                                                  | .5                                                            | .3                                                           |
|                                                                           | 6-15 years | Count                                                                              | 154                                                                                                                                  | 9                                                             | 8                                                            |
|                                                                           |            | % within How many years have you been practicing as an attending anesthesiologist? | 59.7%                                                                                                                                | 3.5%                                                          | 3.1%                                                         |
|                                                                           |            | Adjusted Residual                                                                  | -1.9                                                                                                                                 | -1.3                                                          | -.7                                                          |
|                                                                           | >15 years  | Count                                                                              | 270                                                                                                                                  | 21                                                            | 18                                                           |
|                                                                           |            | % within How many years have you been practicing as an attending anesthesiologist? | 63.8%                                                                                                                                | 5.0%                                                          | 4.3%                                                         |
|                                                                           |            | Adjusted Residual                                                                  | -.5                                                                                                                                  | -.1                                                           | .6                                                           |
| Total                                                                     |            | Count                                                                              | 629                                                                                                                                  | 49                                                            | 37                                                           |
|                                                                           |            | % within How many years have you been practicing as an attending anesthesiologist? | 64.6%                                                                                                                                | 5.0%                                                          | 3.8%                                                         |

Crosstab

|                                                                                       |            |                                                                                                   | What would be<br>your single<br>most important ... |        |
|---------------------------------------------------------------------------------------|------------|---------------------------------------------------------------------------------------------------|----------------------------------------------------|--------|
|                                                                                       |            |                                                                                                   | To fulfill<br>patient's<br>request                 |        |
|                                                                                       |            |                                                                                                   | Total                                              |        |
| How many years<br>have you been<br>practicing as an<br>attending<br>anesthesiologist? | < 2 years  | Count                                                                                             | 18                                                 | 101    |
|                                                                                       |            | % within How<br>many years have<br>you been<br>practicing as an<br>attending<br>anesthesiologist? | 17.8%                                              | 100.0% |
|                                                                                       |            | Adjusted Residual                                                                                 | -2.1                                               |        |
|                                                                                       | 2-5 years  | Count                                                                                             | 39                                                 | 191    |
|                                                                                       |            | % within How<br>many years have<br>you been<br>practicing as an<br>attending<br>anesthesiologist? | 20.4%                                              | 100.0% |
|                                                                                       |            | Adjusted Residual                                                                                 | -2.1                                               |        |
|                                                                                       | 6-15 years | Count                                                                                             | 87                                                 | 258    |
|                                                                                       |            | % within How<br>many years have<br>you been<br>practicing as an<br>attending<br>anesthesiologist? | 33.7%                                              | 100.0% |
|                                                                                       |            | Adjusted Residual                                                                                 | 3.1                                                |        |
|                                                                                       | >15 years  | Count                                                                                             | 114                                                | 423    |
|                                                                                       |            | % within How<br>many years have<br>you been<br>practicing as an<br>attending<br>anesthesiologist? | 27.0%                                              | 100.0% |
|                                                                                       |            | Adjusted Residual                                                                                 | .3                                                 |        |
| Total                                                                                 |            | Count                                                                                             | 258                                                | 973    |
|                                                                                       |            | % within How<br>many years have<br>you been<br>practicing as an<br>attending<br>anesthesiologist? | 26.5%                                              | 100.0% |

### Chi-Square Tests

|                              | Value               | df | Asymp. Sig. (2-sided) |
|------------------------------|---------------------|----|-----------------------|
| Pearson Chi-Square           | 17.006 <sup>a</sup> | 9  | .049                  |
| Likelihood Ratio             | 17.116              | 9  | .047                  |
| Linear-by-Linear Association | 4.712               | 1  | .030                  |
| N of Valid Cases             | 973                 |    |                       |

a. 1 cells (6.3%) have expected count less than 5. The minimum expected count is 3.84.

### Bar Chart

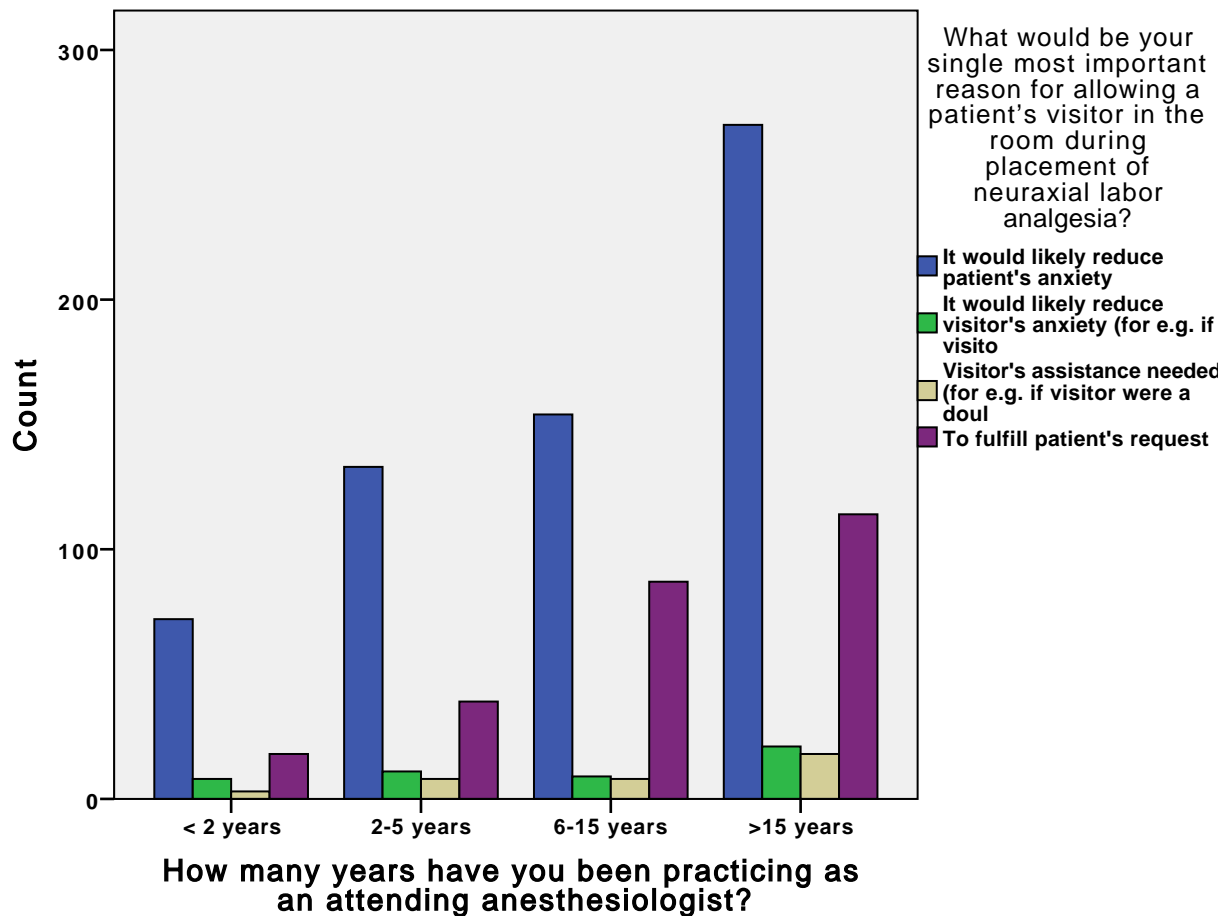

How many years have you been practicing as an attending anesthesiologist? \* How often has another non anesthesia member of the labor and delivery team (for example obstetrician or nurse) attempted to influence your decision to have a visitor present during placement of neuraxial labor analgesia?

**Crosstab**

|                                                                           |            |                                                                                    | How often has another non anesthesia member of the labor and delivery team (for example obstetrician or nurse) attempted to influence your decision to have a visitor present during placement of neuraxial labor analgesia? |                           |              |
|---------------------------------------------------------------------------|------------|------------------------------------------------------------------------------------|------------------------------------------------------------------------------------------------------------------------------------------------------------------------------------------------------------------------------|---------------------------|--------------|
|                                                                           |            |                                                                                    | Rarely (< 5 %)                                                                                                                                                                                                               | Occasionally (5 % - 40 %) | Often > 40 % |
| How many years have you been practicing as an attending anesthesiologist? | < 2 years  | Count                                                                              | 73                                                                                                                                                                                                                           | 20                        | 8            |
|                                                                           |            | % within How many years have you been practicing as an attending anesthesiologist? | 72.3%                                                                                                                                                                                                                        | 19.8%                     | 7.9%         |
|                                                                           |            | Adjusted Residual                                                                  | -.3                                                                                                                                                                                                                          | .5                        | -.1          |
|                                                                           | 2-5 years  | Count                                                                              | 142                                                                                                                                                                                                                          | 35                        | 14           |
|                                                                           |            | % within How many years have you been practicing as an attending anesthesiologist? | 74.3%                                                                                                                                                                                                                        | 18.3%                     | 7.3%         |
|                                                                           |            | Adjusted Residual                                                                  | .2                                                                                                                                                                                                                           | .1                        | -.5          |
|                                                                           | 6-15 years | Count                                                                              | 183                                                                                                                                                                                                                          | 46                        | 29           |
|                                                                           |            | % within How many years have you been practicing as an attending anesthesiologist? | 70.9%                                                                                                                                                                                                                        | 17.8%                     | 11.2%        |
|                                                                           |            | Adjusted Residual                                                                  | -1.2                                                                                                                                                                                                                         | -.1                       | 2.1          |
|                                                                           | >15 years  | Count                                                                              | 319                                                                                                                                                                                                                          | 75                        | 29           |
|                                                                           |            | % within How many years have you been practicing as an attending anesthesiologist? | 75.4%                                                                                                                                                                                                                        | 17.7%                     | 6.9%         |
|                                                                           |            | Adjusted Residual                                                                  | 1.1                                                                                                                                                                                                                          | -.3                       | -1.4         |
| Total                                                                     |            | Count                                                                              | 717                                                                                                                                                                                                                          | 176                       | 80           |
|                                                                           |            | % within How many years have you been practicing as an attending anesthesiologist? | 73.7%                                                                                                                                                                                                                        | 18.1%                     | 8.2%         |

Crosstab

|                                                                           |            |                                                                                                                  |                   |
|---------------------------------------------------------------------------|------------|------------------------------------------------------------------------------------------------------------------|-------------------|
|                                                                           |            |                                                                                                                  | Total             |
| How many years have you been practicing as an attending anesthesiologist? | < 2 years  | Count<br>% within How many years have you been practicing as an attending anesthesiologist?<br>Adjusted Residual | 101<br><br>100.0% |
|                                                                           | 2-5 years  | Count<br>% within How many years have you been practicing as an attending anesthesiologist?<br>Adjusted Residual | 191<br><br>100.0% |
|                                                                           | 6-15 years | Count<br>% within How many years have you been practicing as an attending anesthesiologist?<br>Adjusted Residual | 258<br><br>100.0% |
|                                                                           | >15 years  | Count<br>% within How many years have you been practicing as an attending anesthesiologist?<br>Adjusted Residual | 423<br><br>100.0% |
|                                                                           | Total      | Count<br>% within How many years have you been practicing as an attending anesthesiologist?                      | 973<br><br>100.0% |

# Chi-Square Tests

|                              | Value              | df | Asymp. Sig. (2-sided) |
|------------------------------|--------------------|----|-----------------------|
| Pearson Chi-Square           | 4.700 <sup>a</sup> | 6  | .583                  |
| Likelihood Ratio             | 4.466              | 6  | .614                  |
| Linear-by-Linear Association | .384               | 1  | .535                  |
| N of Valid Cases             | 973                |    |                       |

a. 0 cells (0.0%) have expected count less than 5. The minimum expected count is 8.30.

## Bar Chart

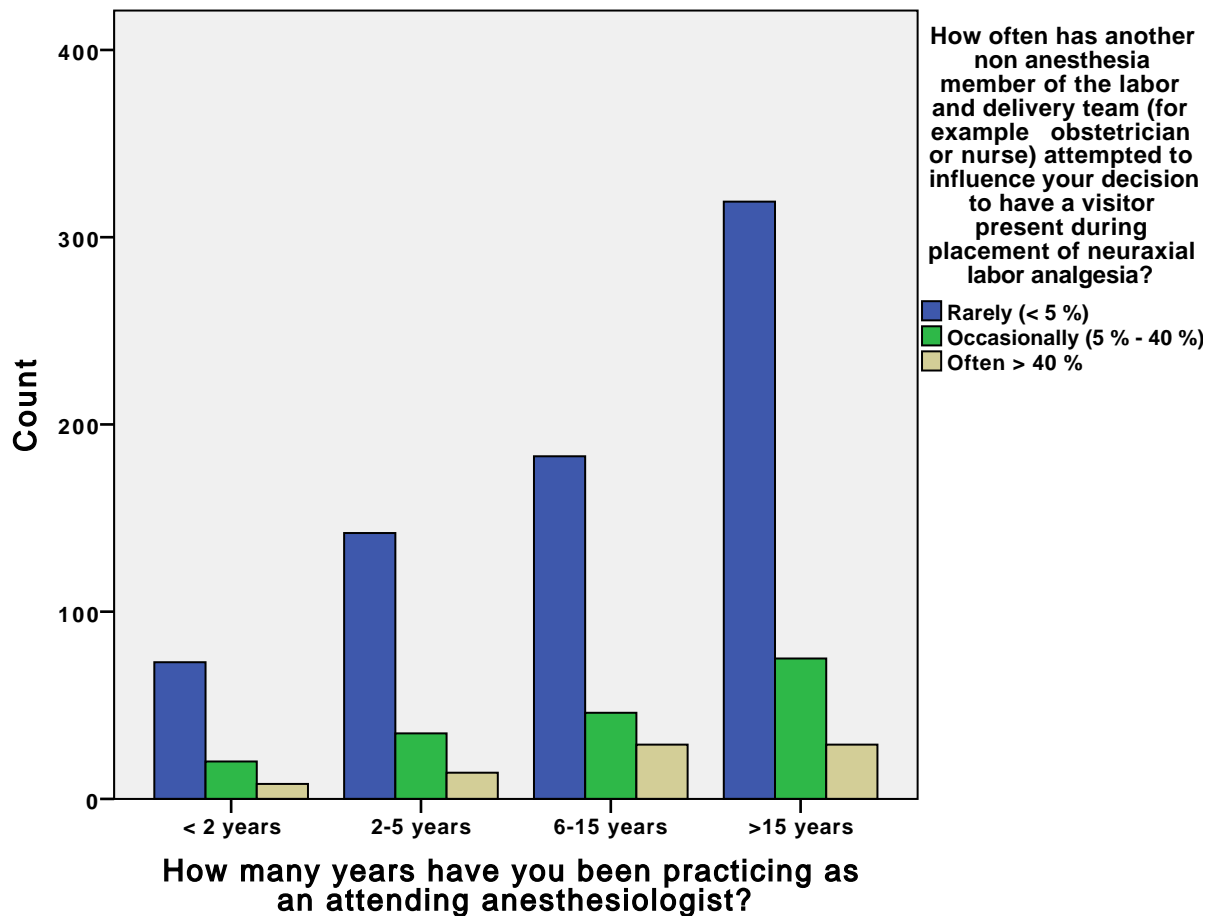

How many years have you been practicing as an attending anesthesiologist? \* How often has another non anesthesia member of the labor and delivery team (for example obstetrician or nurse) attempted to influence your decision to NOT have a visitor present during placement of neuraxial labor analgesia?



**Crosstab**

|                                                                           |            |                                                                                    | How often has another non anesthesia member of the labor and delivery team (for example obstetrician or nurse) attempted to influence your decision to NOT have a visitor present during placement of neuraxial labor analgesia? |                       |              |
|---------------------------------------------------------------------------|------------|------------------------------------------------------------------------------------|----------------------------------------------------------------------------------------------------------------------------------------------------------------------------------------------------------------------------------|-----------------------|--------------|
|                                                                           |            |                                                                                    | Rarely < 5 %                                                                                                                                                                                                                     | Occasionally 5 - 40 % | Often > 40 % |
| How many years have you been practicing as an attending anesthesiologist? | < 2 years  | Count                                                                              | 27                                                                                                                                                                                                                               | 5                     | 4            |
|                                                                           |            | % within How many years have you been practicing as an attending anesthesiologist? | 75.0%                                                                                                                                                                                                                            | 13.9%                 | 11.1%        |
|                                                                           |            | Adjusted Residual                                                                  | -. 6                                                                                                                                                                                                                             | -. 3                  | 1.5          |
|                                                                           | 2-5 years  | Count                                                                              | 36                                                                                                                                                                                                                               | 6                     | 5            |
|                                                                           |            | % within How many years have you been practicing as an attending anesthesiologist? | 76.6%                                                                                                                                                                                                                            | 12.8%                 | 10.6%        |
|                                                                           |            | Adjusted Residual                                                                  | -. 4                                                                                                                                                                                                                             | -. 6                  | 1.6          |
|                                                                           | 6-15 years | Count                                                                              | 67                                                                                                                                                                                                                               | 9                     | 3            |
|                                                                           |            | % within How many years have you been practicing as an attending anesthesiologist? | 84.8%                                                                                                                                                                                                                            | 11.4%                 | 3.8%         |
|                                                                           |            | Adjusted Residual                                                                  | 1.6                                                                                                                                                                                                                              | -1.2                  | -. 8         |
|                                                                           | >15 years  | Count                                                                              | 123                                                                                                                                                                                                                              | 31                    | 6            |
|                                                                           |            | % within How many years have you been practicing as an attending anesthesiologist? | 76.9%                                                                                                                                                                                                                            | 19.4%                 | 3.8%         |
|                                                                           |            | Adjusted Residual                                                                  | -. 7                                                                                                                                                                                                                             | 1.7                   | -1.4         |
| Total                                                                     |            | Count                                                                              | 253                                                                                                                                                                                                                              | 51                    | 18           |
|                                                                           |            | % within How many years have you been practicing as an attending anesthesiologist? | 78.6%                                                                                                                                                                                                                            | 15.8%                 | 5.6%         |

Crosstab

|                                                                           |            |                                                                                                                  |                   |
|---------------------------------------------------------------------------|------------|------------------------------------------------------------------------------------------------------------------|-------------------|
|                                                                           |            |                                                                                                                  | Total             |
| How many years have you been practicing as an attending anesthesiologist? | < 2 years  | Count<br>% within How many years have you been practicing as an attending anesthesiologist?<br>Adjusted Residual | 36<br><br>100.0%  |
|                                                                           | 2-5 years  | Count<br>% within How many years have you been practicing as an attending anesthesiologist?<br>Adjusted Residual | 47<br><br>100.0%  |
|                                                                           | 6-15 years | Count<br>% within How many years have you been practicing as an attending anesthesiologist?<br>Adjusted Residual | 79<br><br>100.0%  |
|                                                                           | >15 years  | Count<br>% within How many years have you been practicing as an attending anesthesiologist?<br>Adjusted Residual | 160<br><br>100.0% |
|                                                                           | Total      | Count<br>% within How many years have you been practicing as an attending anesthesiologist?                      | 322<br><br>100.0% |

# Chi-Square Tests

|                              | Value              | df | Asymp. Sig. (2-sided) |
|------------------------------|--------------------|----|-----------------------|
| Pearson Chi-Square           | 8.677 <sup>a</sup> | 6  | .193                  |
| Likelihood Ratio             | 8.006              | 6  | .238                  |
| Linear-by-Linear Association | .948               | 1  | .330                  |
| N of Valid Cases             | 322                |    |                       |

a. 3 cells (25.0%) have expected count less than 5. The minimum expected count is 2.01.

## Bar Chart

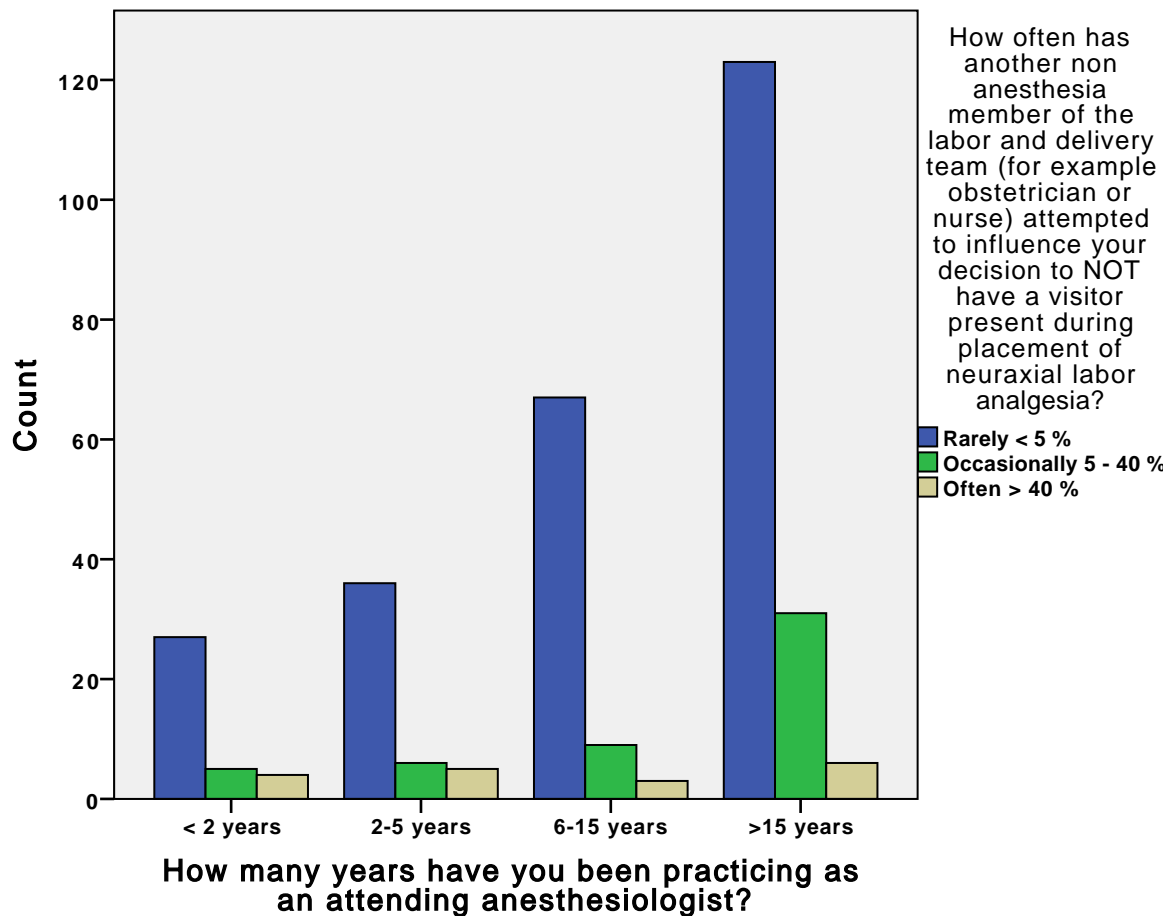

How many years have you been practicing as an attending anest hesiologist? \* What would be your single most important reason f or NOT allowing a patient's visitor in the room during placement of neuraxial labor analgesia?

Crosstab

|                                                                           |            |                                                                                    | What would be your single most important reason for NOT allowing a patient's visitor in the room during placement of neuraxial labor . |                                                               |                                                             |
|---------------------------------------------------------------------------|------------|------------------------------------------------------------------------------------|----------------------------------------------------------------------------------------------------------------------------------------|---------------------------------------------------------------|-------------------------------------------------------------|
|                                                                           |            |                                                                                    | Increase in anesthesiologist's stress                                                                                                  | Possible interference by visitor (for e.g. comments made if d | Concern about visitor (for e.g. passing out or not being ab |
| How many years have you been practicing as an attending anesthesiologist? | < 2 years  | Count                                                                              | 5                                                                                                                                      | 17                                                            | 10                                                          |
|                                                                           |            | % within How many years have you been practicing as an attending anesthesiologist? | 13.9%                                                                                                                                  | 47.2%                                                         | 27.8%                                                       |
|                                                                           |            | Adjusted Residual                                                                  | 1.7                                                                                                                                    | -.2                                                           | -.7                                                         |
|                                                                           | 2-5 years  | Count                                                                              | 3                                                                                                                                      | 33                                                            | 10                                                          |
|                                                                           |            | % within How many years have you been practicing as an attending anesthesiologist? | 6.4%                                                                                                                                   | 70.2%                                                         | 21.3%                                                       |
|                                                                           |            | Adjusted Residual                                                                  | -.2                                                                                                                                    | 3.2                                                           | -1.8                                                        |
|                                                                           | 6-15 years | Count                                                                              | 1                                                                                                                                      | 36                                                            | 33                                                          |
|                                                                           |            | % within How many years have you been practicing as an attending anesthesiologist? | 1.3%                                                                                                                                   | 45.6%                                                         | 41.8%                                                       |
|                                                                           |            | Adjusted Residual                                                                  | -2.3                                                                                                                                   | -.6                                                           | 1.9                                                         |
|                                                                           | >15 years  | Count                                                                              | 14                                                                                                                                     | 70                                                            | 53                                                          |
|                                                                           |            | % within How many years have you been practicing as an attending anesthesiologist? | 8.8%                                                                                                                                   | 43.8%                                                         | 33.1%                                                       |
|                                                                           |            | Adjusted Residual                                                                  | 1.1                                                                                                                                    | -1.7                                                          | .1                                                          |
| Total                                                                     |            | Count                                                                              | 23                                                                                                                                     | 156                                                           | 106                                                         |
|                                                                           |            | % within How many years have you been practicing as an attending anesthesiologist? | 7.1%                                                                                                                                   | 48.4%                                                         | 32.9%                                                       |

Crosstab

|                                                                           |            |                                                                                    | What would be your single most important ... |        |
|---------------------------------------------------------------------------|------------|------------------------------------------------------------------------------------|----------------------------------------------|--------|
|                                                                           |            |                                                                                    | Medico-legal concerns                        | Total  |
| How many years have you been practicing as an attending anesthesiologist? | < 2 years  | Count                                                                              | 4                                            | 36     |
|                                                                           |            | % within How many years have you been practicing as an attending anesthesiologist? | 11.1%                                        | 100.0% |
|                                                                           |            | Adjusted Residual                                                                  | -.1                                          |        |
|                                                                           | 2-5 years  | Count                                                                              | 1                                            | 47     |
|                                                                           |            | % within How many years have you been practicing as an attending anesthesiologist? | 2.1%                                         | 100.0% |
|                                                                           |            | Adjusted Residual                                                                  | -2.2                                         |        |
|                                                                           | 6-15 years | Count                                                                              | 9                                            | 79     |
|                                                                           |            | % within How many years have you been practicing as an attending anesthesiologist? | 11.4%                                        | 100.0% |
|                                                                           |            | Adjusted Residual                                                                  | .0                                           |        |
|                                                                           | >15 years  | Count                                                                              | 23                                           | 160    |
|                                                                           |            | % within How many years have you been practicing as an attending anesthesiologist? | 14.4%                                        | 100.0% |
|                                                                           |            | Adjusted Residual                                                                  | 1.6                                          |        |
| Total                                                                     |            | Count                                                                              | 37                                           | 322    |
|                                                                           |            | % within How many years have you been practicing as an attending anesthesiologist? | 11.5%                                        | 100.0% |

### Chi-Square Tests

|                              | Value               | df | Asymp. Sig. (2-sided) |
|------------------------------|---------------------|----|-----------------------|
| Pearson Chi-Square           | 21.058 <sup>a</sup> | 9  | .012                  |
| Likelihood Ratio             | 23.889              | 9  | .004                  |
| Linear-by-Linear Association | 4.171               | 1  | .041                  |
| N of Valid Cases             | 322                 |    |                       |

a. 3 cells (18.8%) have expected count less than 5. The minimum expected count is 2.57.

### Bar Chart

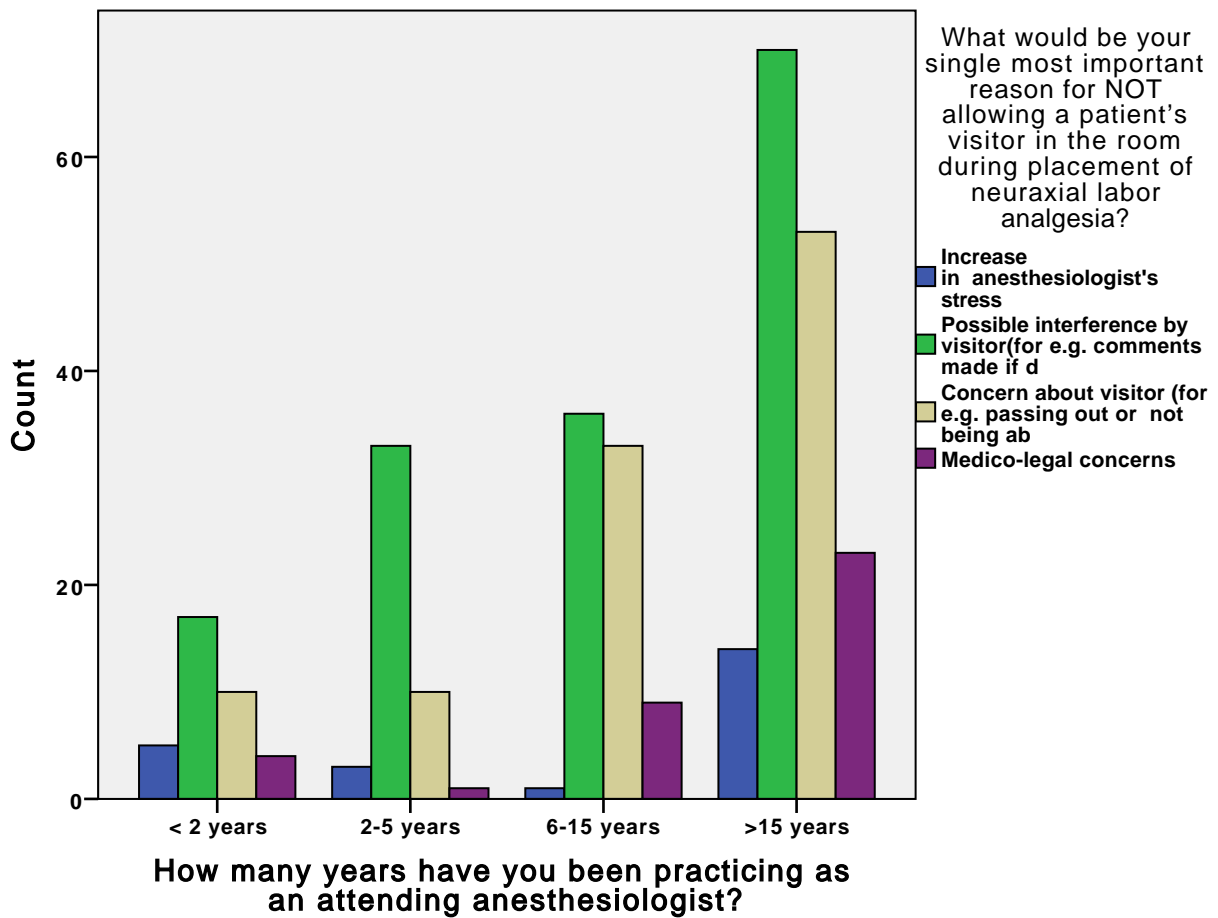

**What is your qualification ? \* What is your preferred technique for neuraxial labor analgesia in an otherwise healthy parturient?**

**Crosstab**

|                              |                                                             |                                       | What is your preferred technique for neuraxial labor analgesia in an otherwise healthy parturient? |                                    | Total  |
|------------------------------|-------------------------------------------------------------|---------------------------------------|----------------------------------------------------------------------------------------------------|------------------------------------|--------|
|                              |                                                             |                                       | Epidural analgesia                                                                                 | Combined spinal epidural analgesia |        |
| What is your qualification ? | Board eligible                                              | Count                                 | 75                                                                                                 | 15                                 | 90     |
|                              |                                                             | % within What is your qualification ? | 83.3%                                                                                              | 16.7%                              | 100.0% |
|                              |                                                             | Adjusted Residual                     | 1.3                                                                                                | -1.3                               |        |
|                              | Board certified                                             | Count                                 | 823                                                                                                | 199                                | 1022   |
|                              |                                                             | % within What is your qualification ? | 80.5%                                                                                              | 19.5%                              | 100.0% |
|                              |                                                             | Adjusted Residual                     | 4.2                                                                                                | -4.2                               |        |
|                              | Board eligible and obstetric anesthesia fellowship trained  | Count                                 | 10                                                                                                 | 12                                 | 22     |
|                              |                                                             | % within What is your qualification ? | 45.5%                                                                                              | 54.5%                              | 100.0% |
|                              |                                                             | Adjusted Residual                     | -3.7                                                                                               | 3.7                                |        |
|                              | Board certified and obstetric anesthesia fellowship trained | Count                                 | 107                                                                                                | 60                                 | 167    |
|                              |                                                             | % within What is your qualification ? | 64.1%                                                                                              | 35.9%                              | 100.0% |
|                              |                                                             | Adjusted Residual                     | -4.7                                                                                               | 4.7                                |        |
|                              | Total                                                       |                                       | 1015                                                                                               | 286                                | 1301   |
|                              |                                                             |                                       | 78.0%                                                                                              | 22.0%                              | 100.0% |

**Chi-Square Tests**

|                              | Value               | df | Asymp. Sig. (2-sided) |
|------------------------------|---------------------|----|-----------------------|
| Pearson Chi-Square           | 37.779 <sup>a</sup> | 3  | .000                  |
| Likelihood Ratio             | 33.266              | 3  | .000                  |
| Linear-by-Linear Association | 27.502              | 1  | .000                  |
| N of Valid Cases             | 1301                |    |                       |

a. 1 cells (12.5%) have expected count less than 5. The minimum expected count is 4.84.

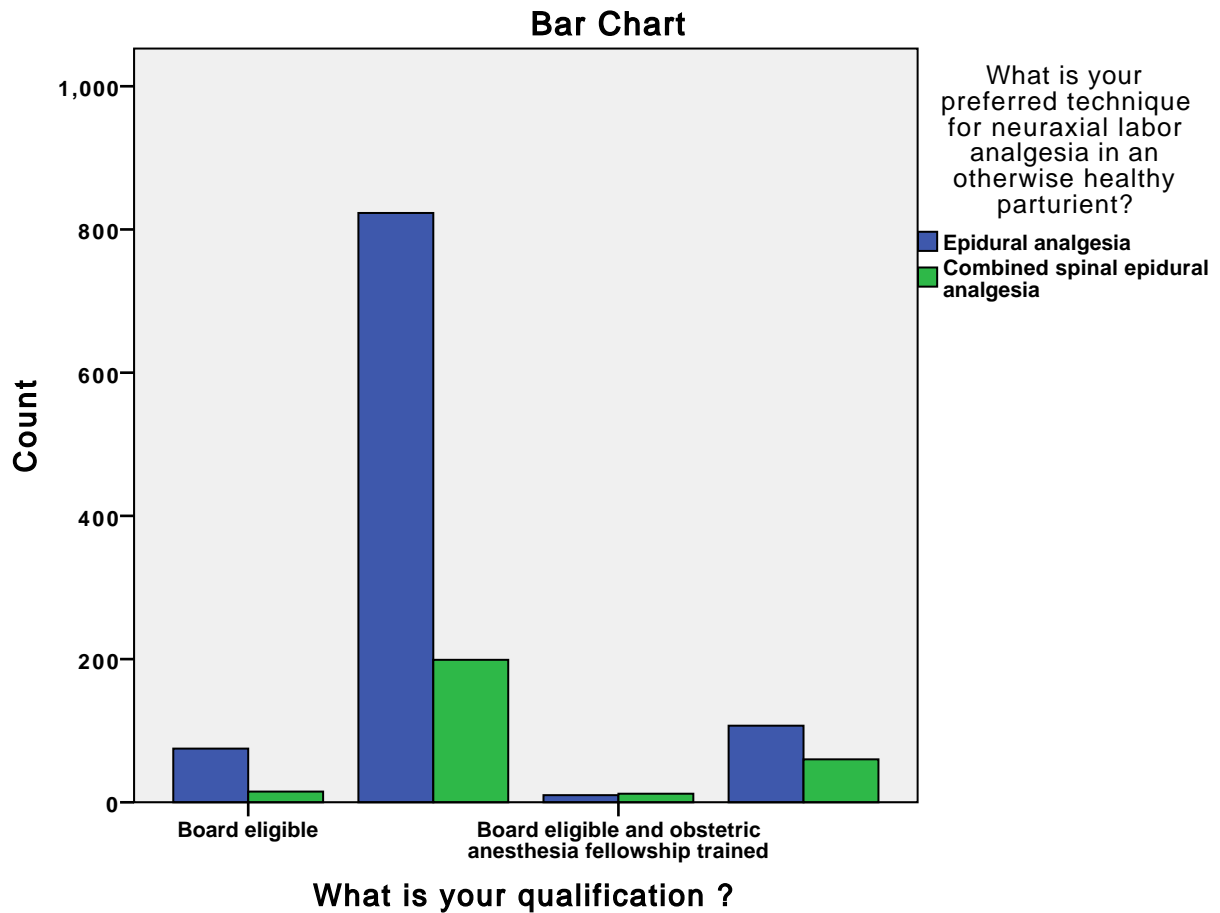

**What is your qualification ? \* Does your practice or hospital have a written policy regarding allowing a patient's visitor in the room during placement of neuraxial labor analgesia?**



**Crosstab**

|                              |                                                             |                                       | Does your practice or hospital have a written policy regarding allowing a patient's visitor in . |                                                        |
|------------------------------|-------------------------------------------------------------|---------------------------------------|--------------------------------------------------------------------------------------------------|--------------------------------------------------------|
|                              |                                                             |                                       | Yes, a written policy exists - Allows visitors                                                   | Yes, a written policy exists - Does not allow visitors |
| What is your qualification ? | Board eligible                                              | Count                                 | 14                                                                                               | 5                                                      |
|                              |                                                             | % within What is your qualification ? | 15.6%                                                                                            | 5.6%                                                   |
|                              |                                                             | Adjusted Residual                     | -1.6                                                                                             | -.9                                                    |
|                              | Board certified                                             | Count                                 | 206                                                                                              | 77                                                     |
|                              |                                                             | % within What is your qualification ? | 20.2%                                                                                            | 7.5%                                                   |
|                              |                                                             | Adjusted Residual                     | -3.9                                                                                             | -1.4                                                   |
|                              | Board eligible and obstetric anesthesia fellowship trained  | Count                                 | 3                                                                                                | 2                                                      |
|                              |                                                             | % within What is your qualification ? | 13.6%                                                                                            | 9.1%                                                   |
|                              |                                                             | Adjusted Residual                     | -1.0                                                                                             | .2                                                     |
|                              | Board certified and obstetric anesthesia fellowship trained | Count                                 | 70                                                                                               | 21                                                     |
|                              |                                                             | % within What is your qualification ? | 41.9%                                                                                            | 12.6%                                                  |
|                              |                                                             | Adjusted Residual                     | 6.4                                                                                              | 2.3                                                    |
| Total                        |                                                             | Count                                 | 293                                                                                              | 105                                                    |
|                              |                                                             | % within What is your qualification ? | 22.5%                                                                                            | 8.1%                                                   |

**Crosstab**

|                              |                                                             |                                       | Does your practice or hospital have a written policy regarding allowing a patient's visitor in ... |               |        |
|------------------------------|-------------------------------------------------------------|---------------------------------------|----------------------------------------------------------------------------------------------------|---------------|--------|
|                              |                                                             |                                       | No written policy exists                                                                           | I do not know |        |
| What is your qualification ? | Board eligible                                              | Count                                 | 31                                                                                                 | 40            | 90     |
|                              |                                                             | % within What is your qualification ? | 34.4%                                                                                              | 44.4%         | 100.0% |
|                              |                                                             | Adjusted Residual                     | -1.0                                                                                               | 3.1           |        |
|                              | Board certified                                             | Count                                 | 418                                                                                                | 321           | 1022   |
|                              |                                                             | % within What is your qualification ? | 40.9%                                                                                              | 31.4%         | 100.0% |
|                              |                                                             | Adjusted Residual                     | 2.1                                                                                                | 2.2           |        |
|                              | Board eligible and obstetric anesthesia fellowship trained  | Count                                 | 9                                                                                                  | 8             | 22     |
|                              |                                                             | % within What is your qualification ? | 40.9%                                                                                              | 36.4%         | 100.0% |
|                              |                                                             | Adjusted Residual                     | .1                                                                                                 | .7            |        |
|                              | Board certified and obstetric anesthesia fellowship trained | Count                                 | 55                                                                                                 | 21            | 167    |
|                              |                                                             | % within What is your qualification ? | 32.9%                                                                                              | 12.6%         | 100.0% |
|                              |                                                             | Adjusted Residual                     | -1.8                                                                                               | -5.3          |        |
| Total                        |                                                             | Count                                 | 513                                                                                                | 390           | 1301   |
|                              |                                                             | % within What is your qualification ? | 39.4%                                                                                              | 30.0%         | 100.0% |

**Chi-Square Tests**

|                              | Value               | df | Asymp. Sig. (2-sided) |
|------------------------------|---------------------|----|-----------------------|
| Pearson Chi-Square           | 65.517 <sup>a</sup> | 9  | .000                  |
| Likelihood Ratio             | 63.793              | 9  | .000                  |
| Linear-by-Linear Association | 57.012              | 1  | .000                  |
| N of Valid Cases             | 1301                |    |                       |

a. 2 cells (12.5%) have expected count less than 5. The minimum expected count is 1.78.

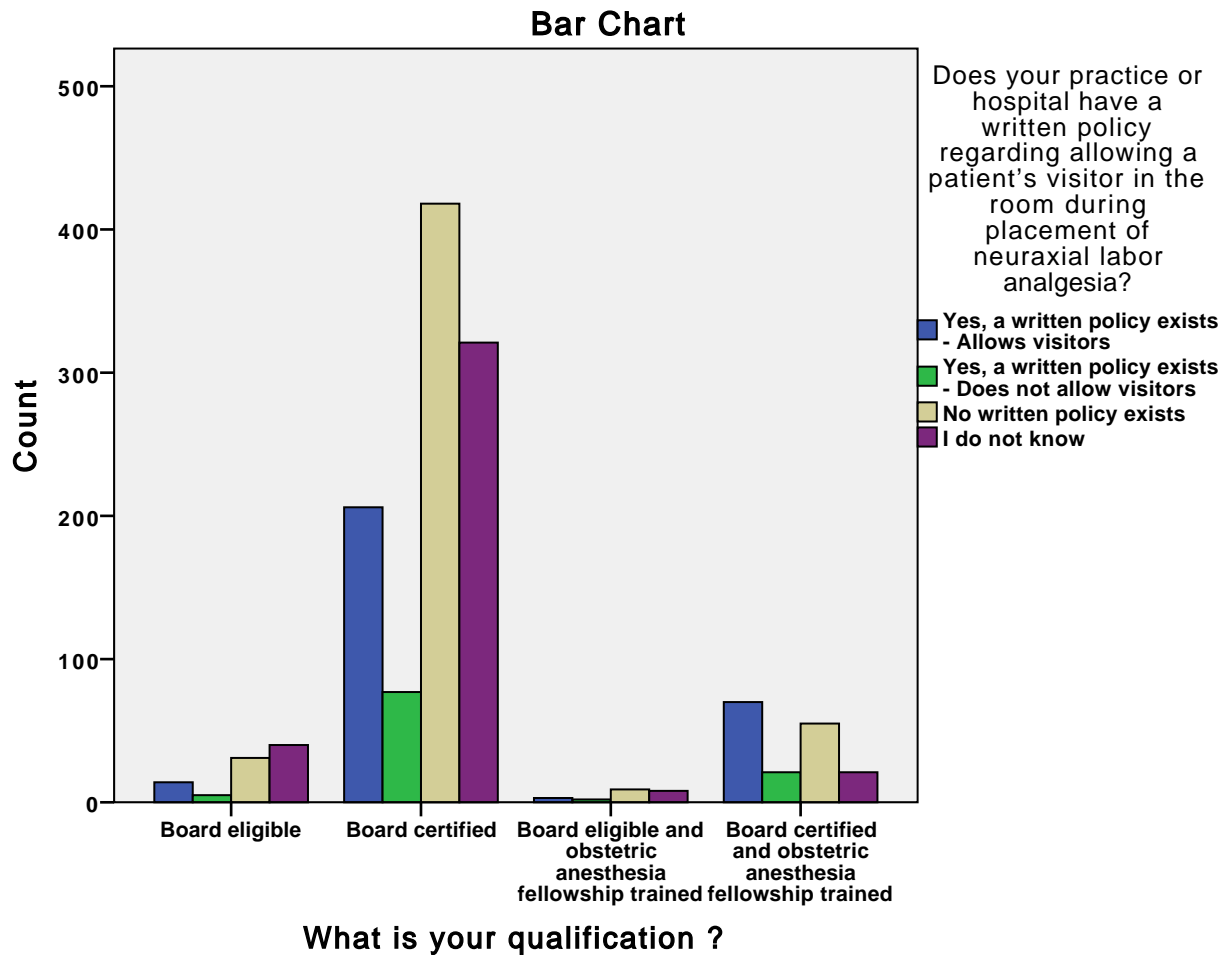

**What is your qualification ? \* If no policy existed, would you be open to allowing a patient's visitor in the room during placement of neuraxial labor analgesia?**

**Crosstab**

|                              |                                                             |                                       | If no policy existed, would you be open to allowing a patient's visitor in the room during placement of neuraxial labor analgesia? |       | Total  |
|------------------------------|-------------------------------------------------------------|---------------------------------------|------------------------------------------------------------------------------------------------------------------------------------|-------|--------|
|                              |                                                             |                                       | Yes                                                                                                                                | No    |        |
| What is your qualification ? | Board eligible                                              | Count                                 | 62                                                                                                                                 | 28    | 90     |
|                              |                                                             | % within What is your qualification ? | 68.9%                                                                                                                              | 31.1% | 100.0% |
|                              |                                                             | Adjusted Residual                     | -1.4                                                                                                                               | 1.4   |        |
|                              | Board certified                                             | Count                                 | 763                                                                                                                                | 259   | 1022   |
|                              |                                                             | % within What is your qualification ? | 74.7%                                                                                                                              | 25.3% | 100.0% |
|                              |                                                             | Adjusted Residual                     | -.7                                                                                                                                | .7    |        |
|                              | Board eligible and obstetric anesthesia fellowship trained  | Count                                 | 17                                                                                                                                 | 5     | 22     |
|                              |                                                             | % within What is your qualification ? | 77.3%                                                                                                                              | 22.7% | 100.0% |
|                              |                                                             | Adjusted Residual                     | .2                                                                                                                                 | -.2   |        |
|                              | Board certified and obstetric anesthesia fellowship trained | Count                                 | 135                                                                                                                                | 32    | 167    |
|                              |                                                             | % within What is your qualification ? | 80.8%                                                                                                                              | 19.2% | 100.0% |
|                              |                                                             | Adjusted Residual                     | 1.8                                                                                                                                | -1.8  |        |
| Total                        |                                                             | Count                                 | 977                                                                                                                                | 324   | 1301   |
|                              |                                                             | % within What is your qualification ? | 75.1%                                                                                                                              | 24.9% | 100.0% |

**Chi-Square Tests**

|                              | Value              | df | Asymp. Sig. (2-sided) |
|------------------------------|--------------------|----|-----------------------|
| Pearson Chi-Square           | 4.959 <sup>a</sup> | 3  | .175                  |
| Likelihood Ratio             | 5.045              | 3  | .169                  |
| Linear-by-Linear Association | 4.693              | 1  | .030                  |
| N of Valid Cases             | 1301               |    |                       |

a. 0 cells (0.0%) have expected count less than 5. The minimum expected count is 5.48.

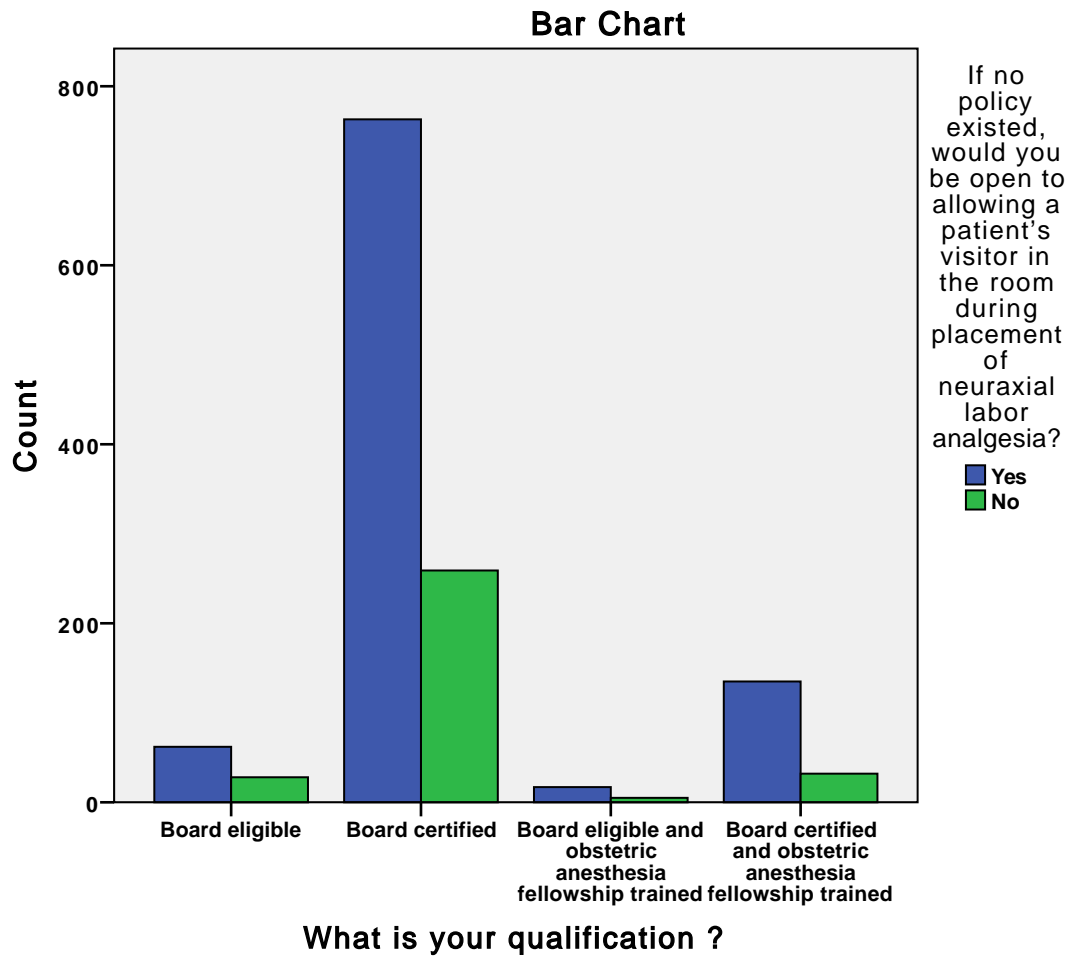

**What is your qualification ? \* If you allowed a visitor in the room during placement of neuraxial labor analgesia, you would want t he**

**Crosstab**

|                              |                                                             |                                       | If you allowed a visitor in the room during placement of neuraxial labor analgesia, you |                        |
|------------------------------|-------------------------------------------------------------|---------------------------------------|-----------------------------------------------------------------------------------------|------------------------|
|                              |                                                             |                                       | Visitor always standing                                                                 | Visitor always sitting |
| What is your qualification ? | Board eligible                                              | Count                                 | 2                                                                                       | 41                     |
|                              |                                                             | % within What is your qualification ? | 3.2%                                                                                    | 65.1%                  |
|                              |                                                             | Adjusted Residual                     | 1.2                                                                                     | -1.3                   |
|                              | Board certified                                             | Count                                 | 9                                                                                       | 542                    |
|                              |                                                             | % within What is your qualification ? | 1.2%                                                                                    | 71.4%                  |
|                              |                                                             | Adjusted Residual                     | -1.2                                                                                    | -.8                    |
|                              | Board eligible and obstetric anesthesia fellowship trained  | Count                                 | 1                                                                                       | 15                     |
|                              |                                                             | % within What is your qualification ? | 5.6%                                                                                    | 83.3%                  |
|                              |                                                             | Adjusted Residual                     | 1.5                                                                                     | 1.1                    |
|                              | Board certified and obstetric anesthesia fellowship trained | Count                                 | 2                                                                                       | 103                    |
|                              |                                                             | % within What is your qualification ? | 1.5%                                                                                    | 77.4%                  |
|                              |                                                             | Adjusted Residual                     | .1                                                                                      | 1.5                    |
| Total                        |                                                             | Count                                 | 14                                                                                      | 701                    |
|                              |                                                             | % within What is your qualification ? | 1.4%                                                                                    | 72.0%                  |

**Crosstab**

|                              |                                                             |                                       | If you allowed a visitor in the room during ... | Total  |
|------------------------------|-------------------------------------------------------------|---------------------------------------|-------------------------------------------------|--------|
|                              |                                                             |                                       | Does not matter                                 |        |
| What is your qualification ? | Board eligible                                              | Count                                 | 20                                              | 63     |
|                              |                                                             | % within What is your qualification ? | 31.7%                                           | 100.0% |
|                              |                                                             | Adjusted Residual                     | 1.0                                             |        |
|                              | Board certified                                             | Count                                 | 208                                             | 759    |
|                              |                                                             | % within What is your qualification ? | 27.4%                                           | 100.0% |
|                              |                                                             | Adjusted Residual                     | 1.2                                             |        |
|                              | Board eligible and obstetric anesthesia fellowship trained  | Count                                 | 2                                               | 18     |
|                              |                                                             | % within What is your qualification ? | 11.1%                                           | 100.0% |
|                              |                                                             | Adjusted Residual                     | -1.5                                            |        |
|                              | Board certified and obstetric anesthesia fellowship trained | Count                                 | 28                                              | 133    |
|                              |                                                             | % within What is your qualification ? | 21.1%                                           | 100.0% |
|                              |                                                             | Adjusted Residual                     | -1.5                                            |        |
| Total                        |                                                             | Count                                 | 258                                             | 973    |
|                              |                                                             | % within What is your qualification ? | 26.5%                                           | 100.0% |

**Chi-Square Tests**

|                              | Value              | df | Asymp. Sig. (2-sided) |
|------------------------------|--------------------|----|-----------------------|
| Pearson Chi-Square           | 9.088 <sup>a</sup> | 6  | .169                  |
| Likelihood Ratio             | 8.384              | 6  | .211                  |
| Linear-by-Linear Association | 3.416              | 1  | .065                  |
| N of Valid Cases             | 973                |    |                       |

a. 4 cells (33.3%) have expected count less than 5. The minimum expected count is .26.

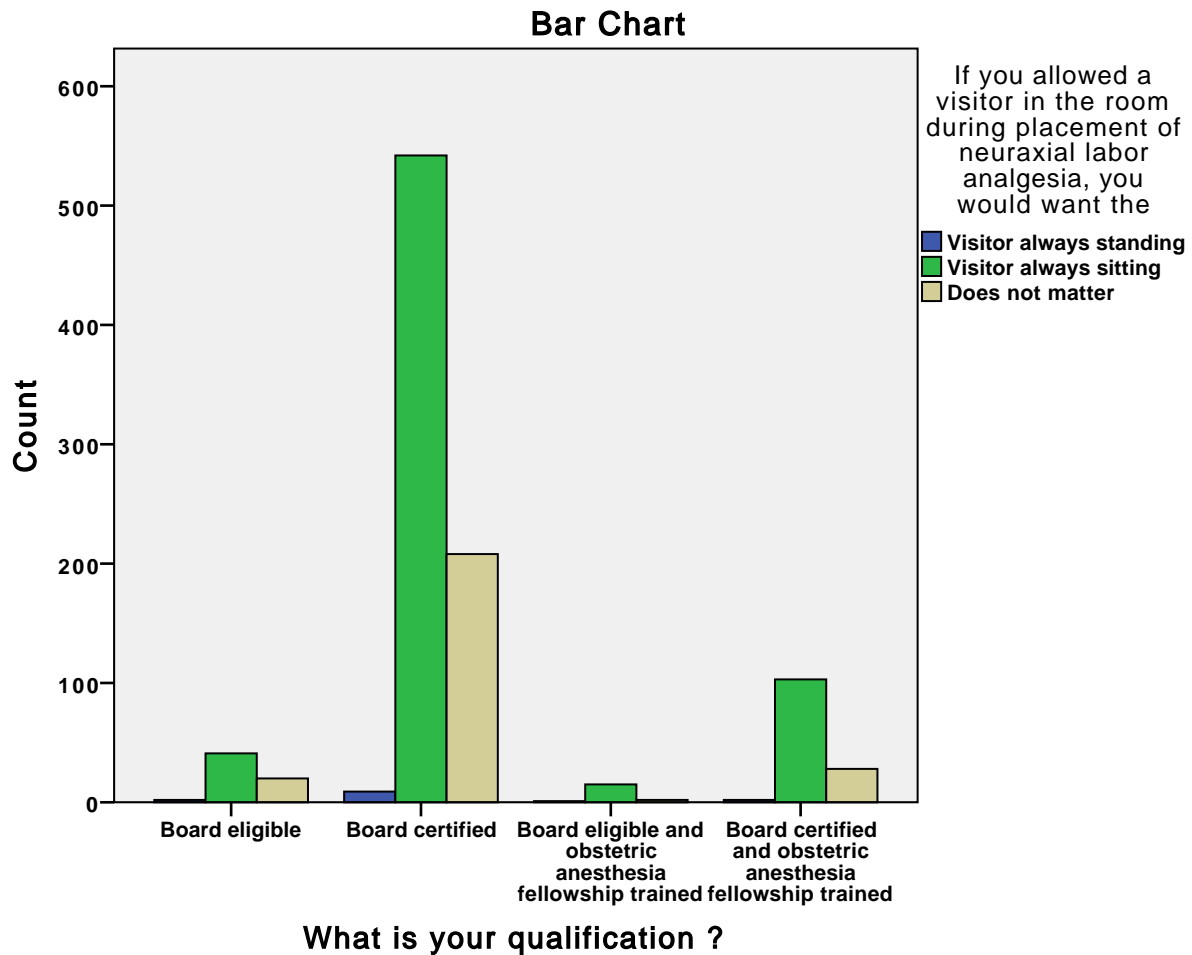

**What is your qualification ? \* If you allowed a visitor in the room during placement of neuraxial labor analgesia, you would want the visitor to be positioned such that,**



**Crosstab**

|                              |                                                             |                                       | If you allowed a visitor in the room during placement of neuraxial labor analgesia, you would want the visitor to be .. |                                                              |
|------------------------------|-------------------------------------------------------------|---------------------------------------|-------------------------------------------------------------------------------------------------------------------------|--------------------------------------------------------------|
|                              |                                                             |                                       | Visitor has no view of procedure (patient is in between anes                                                            | Visitor has partial view of workspace (but cannot see patien |
| What is your qualification ? | Board eligible                                              | Count                                 | 33                                                                                                                      | 17                                                           |
|                              |                                                             | % within What is your qualification ? | 52.4%                                                                                                                   | 27.0%                                                        |
|                              |                                                             | Adjusted Residual                     | -1.5                                                                                                                    | 1.7                                                          |
|                              | Board certified                                             | Count                                 | 467                                                                                                                     | 140                                                          |
|                              |                                                             | % within What is your qualification ? | 61.5%                                                                                                                   | 18.4%                                                        |
|                              |                                                             | Adjusted Residual                     | .6                                                                                                                      | -.9                                                          |
|                              | Board eligible and obstetric anesthesia fellowship trained  | Count                                 | 10                                                                                                                      | 4                                                            |
|                              |                                                             | % within What is your qualification ? | 55.6%                                                                                                                   | 22.2%                                                        |
|                              |                                                             | Adjusted Residual                     | -.5                                                                                                                     | .4                                                           |
|                              | Board certified and obstetric anesthesia fellowship trained | Count                                 | 84                                                                                                                      | 24                                                           |
|                              |                                                             | % within What is your qualification ? | 63.2%                                                                                                                   | 18.0%                                                        |
|                              |                                                             | Adjusted Residual                     | .5                                                                                                                      | -.3                                                          |
| Total                        |                                                             | Count                                 | 594                                                                                                                     | 185                                                          |
|                              |                                                             | % within What is your qualification ? | 61.0%                                                                                                                   | 19.0%                                                        |

**Crosstab**

|                              |                                                             |                                       | If you allowed a visitor in the room during placement of ... |        |
|------------------------------|-------------------------------------------------------------|---------------------------------------|--------------------------------------------------------------|--------|
|                              |                                                             |                                       | Does not matter                                              |        |
|                              |                                                             |                                       | Total                                                        |        |
| What is your qualification ? | Board eligible                                              | Count                                 | 13                                                           | 63     |
|                              |                                                             | % within What is your qualification ? | 20.6%                                                        | 100.0% |
|                              |                                                             | Adjusted Residual                     | .1                                                           |        |
|                              | Board certified                                             | Count                                 | 152                                                          | 759    |
|                              |                                                             | % within What is your qualification ? | 20.0%                                                        | 100.0% |
|                              |                                                             | Adjusted Residual                     | .1                                                           |        |
|                              | Board eligible and obstetric anesthesia fellowship trained  | Count                                 | 4                                                            | 18     |
|                              |                                                             | % within What is your qualification ? | 22.2%                                                        | 100.0% |
|                              |                                                             | Adjusted Residual                     | .2                                                           |        |
|                              | Board certified and obstetric anesthesia fellowship trained | Count                                 | 25                                                           | 133    |
|                              |                                                             | % within What is your qualification ? | 18.8%                                                        | 100.0% |
|                              |                                                             | Adjusted Residual                     | -.4                                                          |        |
| Total                        |                                                             | Count                                 | 194                                                          | 973    |
|                              |                                                             | % within What is your qualification ? | 19.9%                                                        | 100.0% |

**Chi-Square Tests**

|                              | Value              | df | Asymp. Sig. (2-sided) |
|------------------------------|--------------------|----|-----------------------|
| Pearson Chi-Square           | 3.539 <sup>a</sup> | 6  | .739                  |
| Likelihood Ratio             | 3.333              | 6  | .766                  |
| Linear-by-Linear Association | .479               | 1  | .489                  |
| N of Valid Cases             | 973                |    |                       |

a. 2 cells (16.7%) have expected count less than 5. The minimum expected count is 3.42.

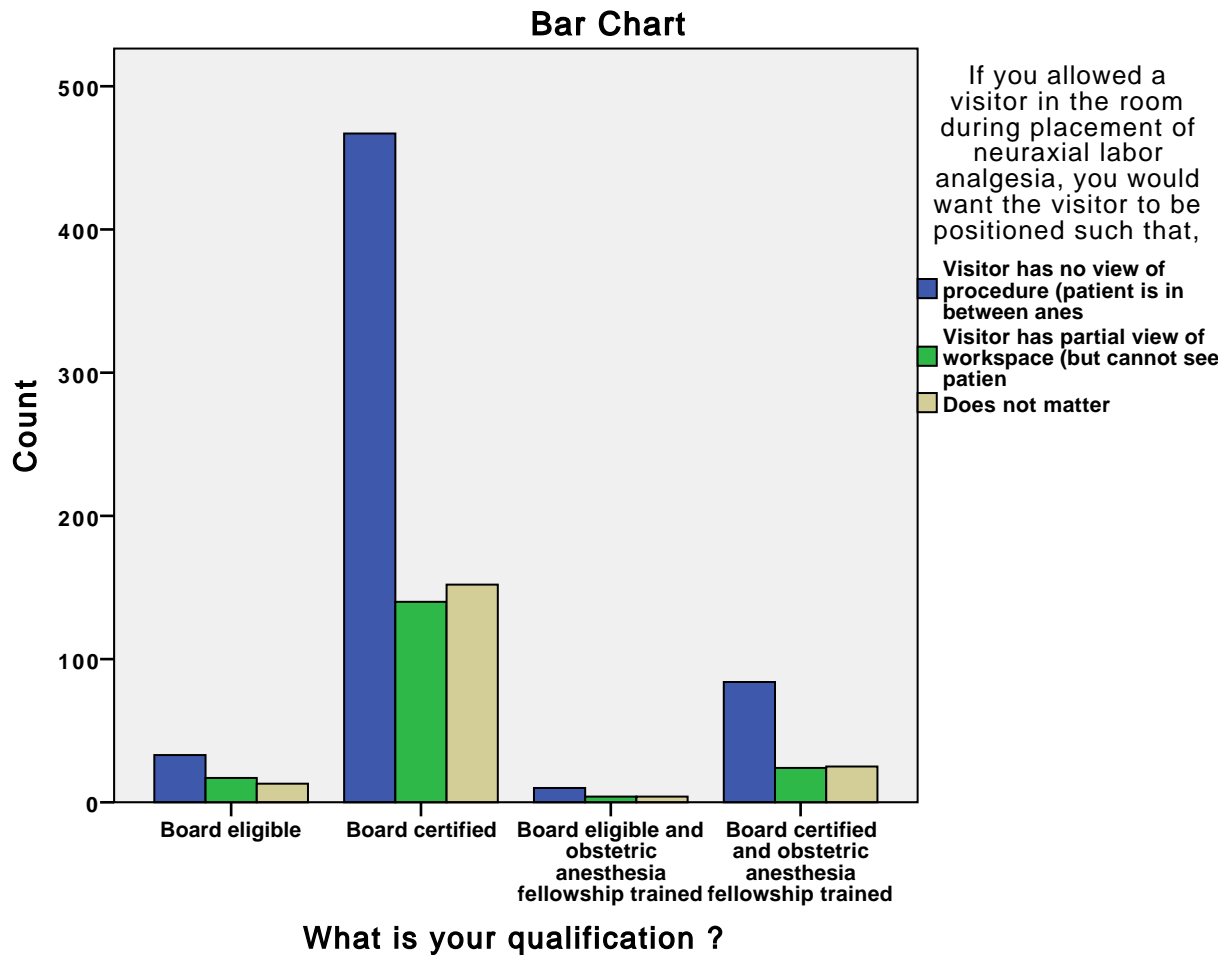

**What is your qualification ? \* What would be your single most important reason for allowing a patient's visitor in the room during placement of neuraxial labor analgesia?**

**Crosstab**

|                              |                                                             |                                       | What would be your single most important reason for allowing a patient's visitor in . |                                                              |
|------------------------------|-------------------------------------------------------------|---------------------------------------|---------------------------------------------------------------------------------------|--------------------------------------------------------------|
|                              |                                                             |                                       | It would likely reduce patient's anxiety                                              | It would likely reduce visitor's anxiety (for e.g. if visito |
| What is your qualification ? | Board eligible                                              | Count                                 | 40                                                                                    | 5                                                            |
|                              |                                                             | % within What is your qualification ? | 63.5%                                                                                 | 7.9%                                                         |
|                              |                                                             | Adjusted Residual                     | -.2                                                                                   | 1.1                                                          |
|                              | Board certified                                             | Count                                 | 503                                                                                   | 36                                                           |
|                              |                                                             | % within What is your qualification ? | 66.3%                                                                                 | 4.7%                                                         |
|                              |                                                             | Adjusted Residual                     | 2.0                                                                                   | -.8                                                          |
|                              | Board eligible and obstetric anesthesia fellowship trained  | Count                                 | 13                                                                                    | 0                                                            |
|                              |                                                             | % within What is your qualification ? | 72.2%                                                                                 | 0.0%                                                         |
|                              |                                                             | Adjusted Residual                     | .7                                                                                    | -1.0                                                         |
|                              | Board certified and obstetric anesthesia fellowship trained | Count                                 | 73                                                                                    | 8                                                            |
|                              |                                                             | % within What is your qualification ? | 54.9%                                                                                 | 6.0%                                                         |
|                              |                                                             | Adjusted Residual                     | -2.5                                                                                  | .6                                                           |
| Total                        |                                                             | Count                                 | 629                                                                                   | 49                                                           |
|                              |                                                             | % within What is your qualification ? | 64.6%                                                                                 | 5.0%                                                         |

**Crosstab**

|                              |                                                             |                                       | What would be your single most important reason for allowing a patient's visitor in the room ... |                              | Total  |
|------------------------------|-------------------------------------------------------------|---------------------------------------|--------------------------------------------------------------------------------------------------|------------------------------|--------|
|                              |                                                             |                                       | Visitor's assistance needed (for e. g. if visitor were a doula)                                  | To fulfill patient's request |        |
| What is your qualification ? | Board eligible                                              | Count                                 | 2                                                                                                | 16                           | 63     |
|                              |                                                             | % within What is your qualification ? | 3.2%                                                                                             | 25.4%                        | 100.0% |
|                              |                                                             | Adjusted Residual                     | -.3                                                                                              | -.2                          |        |
|                              | Board certified                                             | Count                                 | 26                                                                                               | 194                          | 759    |
|                              |                                                             | % within What is your qualification ? | 3.4%                                                                                             | 25.6%                        | 100.0% |
|                              |                                                             | Adjusted Residual                     | -1.2                                                                                             | -1.3                         |        |
|                              | Board eligible and obstetric anesthesia fellowship trained  | Count                                 | 0                                                                                                | 5                            | 18     |
|                              |                                                             | % within What is your qualification ? | 0.0%                                                                                             | 27.8%                        | 100.0% |
|                              |                                                             | Adjusted Residual                     | -.9                                                                                              | .1                           |        |
|                              | Board certified and obstetric anesthesia fellowship trained | Count                                 | 9                                                                                                | 43                           | 133    |
|                              |                                                             | % within What is your qualification ? | 6.8%                                                                                             | 32.3%                        | 100.0% |
|                              |                                                             | Adjusted Residual                     | 1.9                                                                                              | 1.6                          |        |
| Total                        |                                                             | Count                                 | 37                                                                                               | 258                          | 973    |
|                              |                                                             | % within What is your qualification ? | 3.8%                                                                                             | 26.5%                        | 100.0% |

**Chi-Square Tests**

|                              | Value               | df | Asymp. Sig. (2-sided) |
|------------------------------|---------------------|----|-----------------------|
| Pearson Chi-Square           | 10.889 <sup>a</sup> | 9  | .283                  |
| Likelihood Ratio             | 11.729              | 9  | .229                  |
| Linear-by-Linear Association | 4.215               | 1  | .040                  |
| N of Valid Cases             | 973                 |    |                       |

a. 5 cells (31.3%) have expected count less than 5. The minimum expected count is .68.

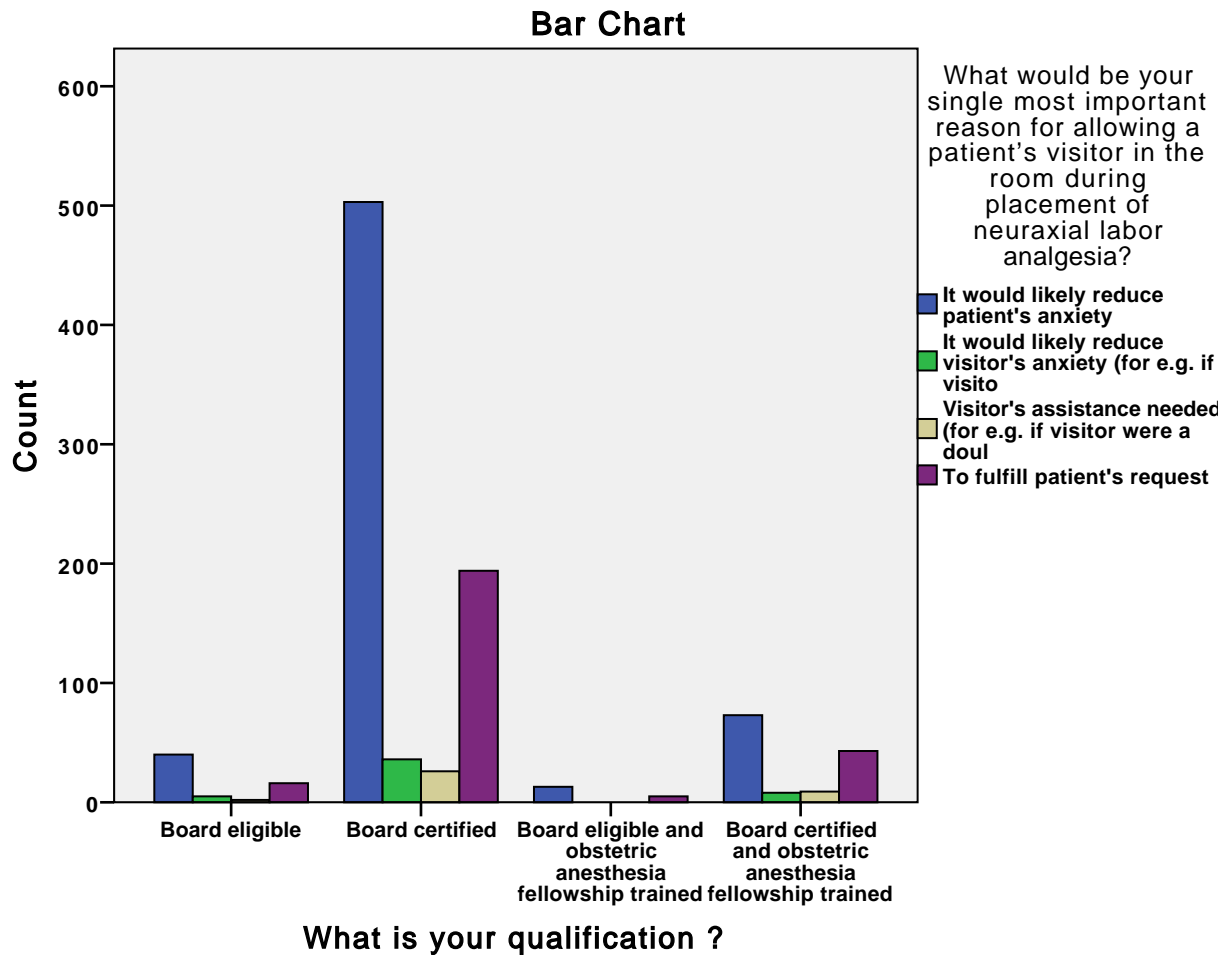

**What is your qualification ? \* How often has another non anesthesiologist member of the labor and delivery team (for example obstetrician or nurse) attempted to influence your decision to have a visit or present during placement of neuraxial labor analgesia?**

**Crosstab**

|                              |                                                             |                                       | How often has another non anesthesia member of the labor and delivery team (for example obstetrician or nurse) attempted to influence your decision to have a visitor |                           |
|------------------------------|-------------------------------------------------------------|---------------------------------------|-----------------------------------------------------------------------------------------------------------------------------------------------------------------------|---------------------------|
|                              |                                                             |                                       | Rarely (< 5 %)                                                                                                                                                        | Occasionally (5 % - 40 %) |
| What is your qualification ? | Board eligible                                              | Count                                 | 50                                                                                                                                                                    | 7                         |
|                              |                                                             | % within What is your qualification ? | 79.4%                                                                                                                                                                 | 11.1%                     |
|                              |                                                             | Adjusted Residual                     | 1.1                                                                                                                                                                   | -1.5                      |
|                              | Board certified                                             | Count                                 | 562                                                                                                                                                                   | 141                       |
|                              |                                                             | % within What is your qualification ? | 74.0%                                                                                                                                                                 | 18.6%                     |
|                              |                                                             | Adjusted Residual                     | .5                                                                                                                                                                    | .7                        |
|                              | Board eligible and obstetric anesthesia fellowship trained  | Count                                 | 9                                                                                                                                                                     | 5                         |
|                              |                                                             | % within What is your qualification ? | 50.0%                                                                                                                                                                 | 27.8%                     |
|                              |                                                             | Adjusted Residual                     | -2.3                                                                                                                                                                  | 1.1                       |
|                              | Board certified and obstetric anesthesia fellowship trained | Count                                 | 96                                                                                                                                                                    | 23                        |
|                              |                                                             | % within What is your qualification ? | 72.2%                                                                                                                                                                 | 17.3%                     |
|                              |                                                             | Adjusted Residual                     | -.4                                                                                                                                                                   | -.3                       |
| Total                        |                                                             | Count                                 | 717                                                                                                                                                                   | 176                       |
|                              |                                                             | % within What is your qualification ? | 73.7%                                                                                                                                                                 | 18.1%                     |

**Crosstab**

|                              |                                                             |                                       | How often has another non anesthesia member of the labor and delivery team ... |        |
|------------------------------|-------------------------------------------------------------|---------------------------------------|--------------------------------------------------------------------------------|--------|
|                              |                                                             |                                       | Often > 40 %                                                                   | Total  |
| What is your qualification ? | Board eligible                                              | Count                                 | 6                                                                              | 63     |
|                              |                                                             | % within What is your qualification ? | 9.5%                                                                           | 100.0% |
|                              |                                                             | Adjusted Residual                     | .4                                                                             |        |
|                              | Board certified                                             | Count                                 | 56                                                                             | 759    |
|                              |                                                             | % within What is your qualification ? | 7.4%                                                                           | 100.0% |
|                              |                                                             | Adjusted Residual                     | -1.8                                                                           |        |
|                              | Board eligible and obstetric anesthesia fellowship trained  | Count                                 | 4                                                                              | 18     |
|                              |                                                             | % within What is your qualification ? | 22.2%                                                                          | 100.0% |
|                              |                                                             | Adjusted Residual                     | 2.2                                                                            |        |
|                              | Board certified and obstetric anesthesia fellowship trained | Count                                 | 14                                                                             | 133    |
|                              |                                                             | % within What is your qualification ? | 10.5%                                                                          | 100.0% |
|                              |                                                             | Adjusted Residual                     | 1.0                                                                            |        |
| Total                        |                                                             | Count                                 | 80                                                                             | 973    |
|                              |                                                             | % within What is your qualification ? | 8.2%                                                                           | 100.0% |

**Chi-Square Tests**

|                              | Value               | df | Asymp. Sig. (2-sided) |
|------------------------------|---------------------|----|-----------------------|
| Pearson Chi-Square           | 10.414 <sup>a</sup> | 6  | .108                  |
| Likelihood Ratio             | 9.294               | 6  | .158                  |
| Linear-by-Linear Association | 1.761               | 1  | .184                  |
| N of Valid Cases             | 973                 |    |                       |

a. 2 cells (16.7%) have expected count less than 5. The minimum expected count is 1.48.



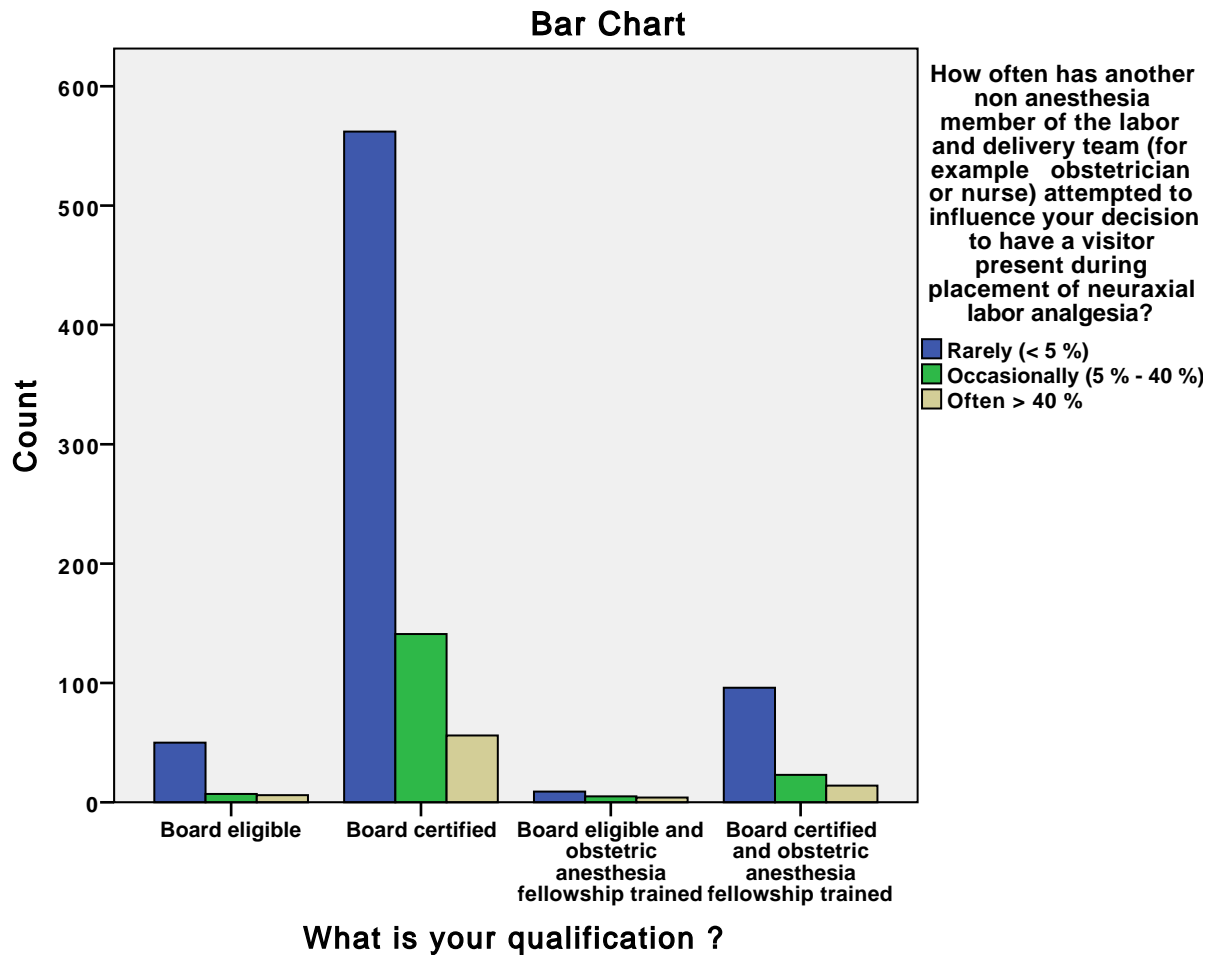

**What is your qualification ? \* How often has another non anesthesia member of the labor and delivery team (for example obstetrician or nurse) attempted to influence your decision to NOT have a visitor present during placement of neuraxial labor analgesia?**

**Crosstab**

|                              |                                                             |                                       | How often has another non anesthesia member of the labor and delivery team (for example obstetrician or nurse) attempted to influence your decision to NOT have a visitor . |                       |
|------------------------------|-------------------------------------------------------------|---------------------------------------|-----------------------------------------------------------------------------------------------------------------------------------------------------------------------------|-----------------------|
|                              |                                                             |                                       | Rarely < 5 %                                                                                                                                                                | Occasionally 5 - 40 % |
| What is your qualification ? | Board eligible                                              | Count                                 | 22                                                                                                                                                                          | 3                     |
|                              |                                                             | % within What is your qualification ? | 78.6%                                                                                                                                                                       | 10.7%                 |
|                              |                                                             | Adjusted Residual                     | .0                                                                                                                                                                          | -.8                   |
|                              | Board certified                                             | Count                                 | 203                                                                                                                                                                         | 42                    |
|                              |                                                             | % within What is your qualification ? | 79.0%                                                                                                                                                                       | 16.3%                 |
|                              |                                                             | Adjusted Residual                     | .4                                                                                                                                                                          | .5                    |
|                              | Board eligible and obstetric anesthesia fellowship trained  | Count                                 | 3                                                                                                                                                                           | 2                     |
|                              |                                                             | % within What is your qualification ? | 60.0%                                                                                                                                                                       | 40.0%                 |
|                              |                                                             | Adjusted Residual                     | -1.0                                                                                                                                                                        | 1.5                   |
|                              | Board certified and obstetric anesthesia fellowship trained | Count                                 | 25                                                                                                                                                                          | 4                     |
|                              |                                                             | % within What is your qualification ? | 78.1%                                                                                                                                                                       | 12.5%                 |
|                              |                                                             | Adjusted Residual                     | -.1                                                                                                                                                                         | -.5                   |
| Total                        |                                                             | Count                                 | 253                                                                                                                                                                         | 51                    |
|                              |                                                             | % within What is your qualification ? | 78.6%                                                                                                                                                                       | 15.8%                 |

**Crosstab**

|                              |                                                             |                                       | How often has another non anesthesia member of the labor and delivery team ... |        |
|------------------------------|-------------------------------------------------------------|---------------------------------------|--------------------------------------------------------------------------------|--------|
|                              |                                                             |                                       | Often > 40 %                                                                   | Total  |
| What is your qualification ? | Board eligible                                              | Count                                 | 3                                                                              | 28     |
|                              |                                                             | % within What is your qualification ? | 10.7%                                                                          | 100.0% |
|                              |                                                             | Adjusted Residual                     | 1.2                                                                            |        |
|                              | Board certified                                             | Count                                 | 12                                                                             | 257    |
|                              |                                                             | % within What is your qualification ? | 4.7%                                                                           | 100.0% |
|                              |                                                             | Adjusted Residual                     | -1.4                                                                           |        |
|                              | Board eligible and obstetric anesthesia fellowship trained  | Count                                 | 0                                                                              | 5      |
|                              |                                                             | % within What is your qualification ? | 0.0%                                                                           | 100.0% |
|                              |                                                             | Adjusted Residual                     | -.5                                                                            |        |
|                              | Board certified and obstetric anesthesia fellowship trained | Count                                 | 3                                                                              | 32     |
|                              |                                                             | % within What is your qualification ? | 9.4%                                                                           | 100.0% |
|                              |                                                             | Adjusted Residual                     | 1.0                                                                            |        |
| Total                        |                                                             | Count                                 | 18                                                                             | 322    |
|                              |                                                             | % within What is your qualification ? | 5.6%                                                                           | 100.0% |

**Chi-Square Tests**

|                              | Value              | df | Asymp. Sig. (2-sided) |
|------------------------------|--------------------|----|-----------------------|
| Pearson Chi-Square           | 5.604 <sup>a</sup> | 6  | .469                  |
| Likelihood Ratio             | 5.029              | 6  | .540                  |
| Linear-by-Linear Association | .077               | 1  | .782                  |
| N of Valid Cases             | 322                |    |                       |

a. 6 cells (50.0%) have expected count less than 5. The minimum expected count is .28.

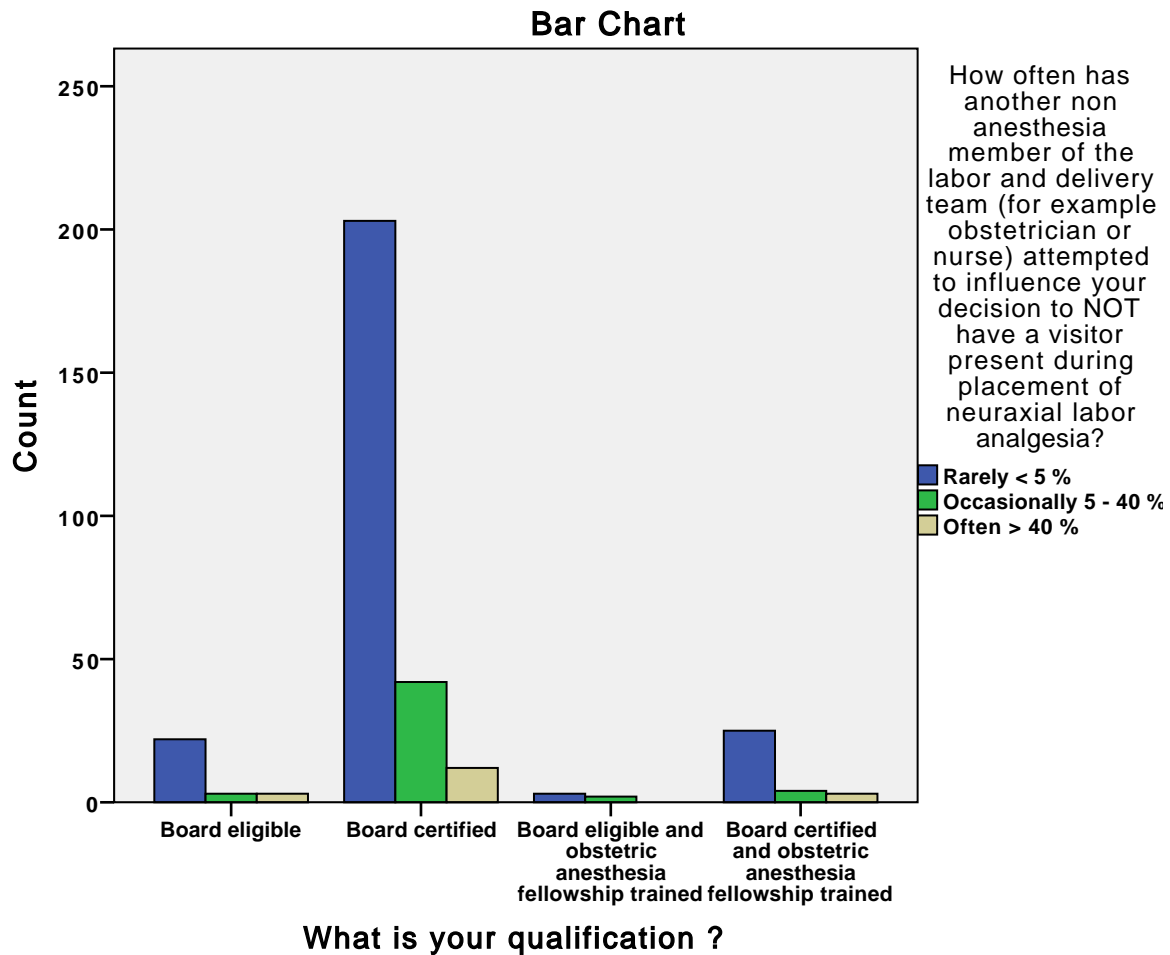

**What is your qualification ? \* What would be your single most important reason for NOT allowing a patient's visitor in the room during placement of neuraxial labor analgesia?**

**Crosstab**

|                              |                                                             |                                       | What would be your single most important reason for NOT allowing a patient's visitor in . |                                                              |
|------------------------------|-------------------------------------------------------------|---------------------------------------|-------------------------------------------------------------------------------------------|--------------------------------------------------------------|
|                              |                                                             |                                       | Increase in anesthesiologist's stress                                                     | Possible interference by visitor(for e.g. comments made if d |
| What is your qualification ? | Board eligible                                              | Count                                 | 4                                                                                         | 16                                                           |
|                              |                                                             | % within What is your qualification ? | 14.3%                                                                                     | 57.1%                                                        |
|                              |                                                             | Adjusted Residual                     | 1.5                                                                                       | 1.0                                                          |
|                              | Board certified                                             | Count                                 | 16                                                                                        | 125                                                          |
|                              |                                                             | % within What is your qualification ? | 6.2%                                                                                      | 48.6%                                                        |
|                              |                                                             | Adjusted Residual                     | -1.3                                                                                      | .1                                                           |
|                              | Board eligible and obstetric anesthesia fellowship trained  | Count                                 | 0                                                                                         | 3                                                            |
|                              |                                                             | % within What is your qualification ? | 0.0%                                                                                      | 60.0%                                                        |
|                              |                                                             | Adjusted Residual                     | -.6                                                                                       | .5                                                           |
|                              | Board certified and obstetric anesthesia fellowship trained | Count                                 | 3                                                                                         | 12                                                           |
|                              |                                                             | % within What is your qualification ? | 9.4%                                                                                      | 37.5%                                                        |
|                              |                                                             | Adjusted Residual                     | .5                                                                                        | -1.3                                                         |
| Total                        |                                                             | Count                                 | 23                                                                                        | 156                                                          |
|                              |                                                             | % within What is your qualification ? | 7.1%                                                                                      | 48.4%                                                        |

Crosstab

|                              |                                                             |                                       | What would be your single most important reason for NOT allowing a patient's visitor in ... |                       | Total  |
|------------------------------|-------------------------------------------------------------|---------------------------------------|---------------------------------------------------------------------------------------------|-----------------------|--------|
|                              |                                                             |                                       | Concern about visitor (for e.g. passing out or not being ab                                 | Medico-legal concerns |        |
| What is your qualification ? | Board eligible                                              | Count                                 | 6                                                                                           | 2                     | 28     |
|                              |                                                             | % within What is your qualification ? | 21.4%                                                                                       | 7.1%                  | 100.0% |
|                              |                                                             | Adjusted Residual                     | -1.4                                                                                        | -.8                   |        |
|                              | Board certified                                             | Count                                 | 87                                                                                          | 29                    | 257    |
|                              |                                                             | % within What is your qualification ? | 33.9%                                                                                       | 11.3%                 | 100.0% |
|                              |                                                             | Adjusted Residual                     | .7                                                                                          | -.2                   |        |
|                              | Board eligible and obstetric anesthesia fellowship trained  | Count                                 | 1                                                                                           | 1                     | 5      |
|                              |                                                             | % within What is your qualification ? | 20.0%                                                                                       | 20.0%                 | 100.0% |
|                              |                                                             | Adjusted Residual                     | -.6                                                                                         | .6                    |        |
|                              | Board certified and obstetric anesthesia fellowship trained | Count                                 | 12                                                                                          | 5                     | 32     |
|                              |                                                             | % within What is your qualification ? | 37.5%                                                                                       | 15.6%                 | 100.0% |
|                              |                                                             | Adjusted Residual                     | .6                                                                                          | .8                    |        |
| Total                        |                                                             | Count                                 | 106                                                                                         | 37                    | 322    |
|                              |                                                             | % within What is your qualification ? | 32.9%                                                                                       | 11.5%                 | 100.0% |

Chi-Square Tests

|                              | Value              | df | Asymp. Sig. (2-sided) |
|------------------------------|--------------------|----|-----------------------|
| Pearson Chi-Square           | 7.161 <sup>a</sup> | 9  | .620                  |
| Likelihood Ratio             | 7.249              | 9  | .611                  |
| Linear-by-Linear Association | 2.316              | 1  | .128                  |
| N of Valid Cases             | 322                |    |                       |

a. 8 cells (50.0%) have expected count less than 5. The minimum expected count is .36.

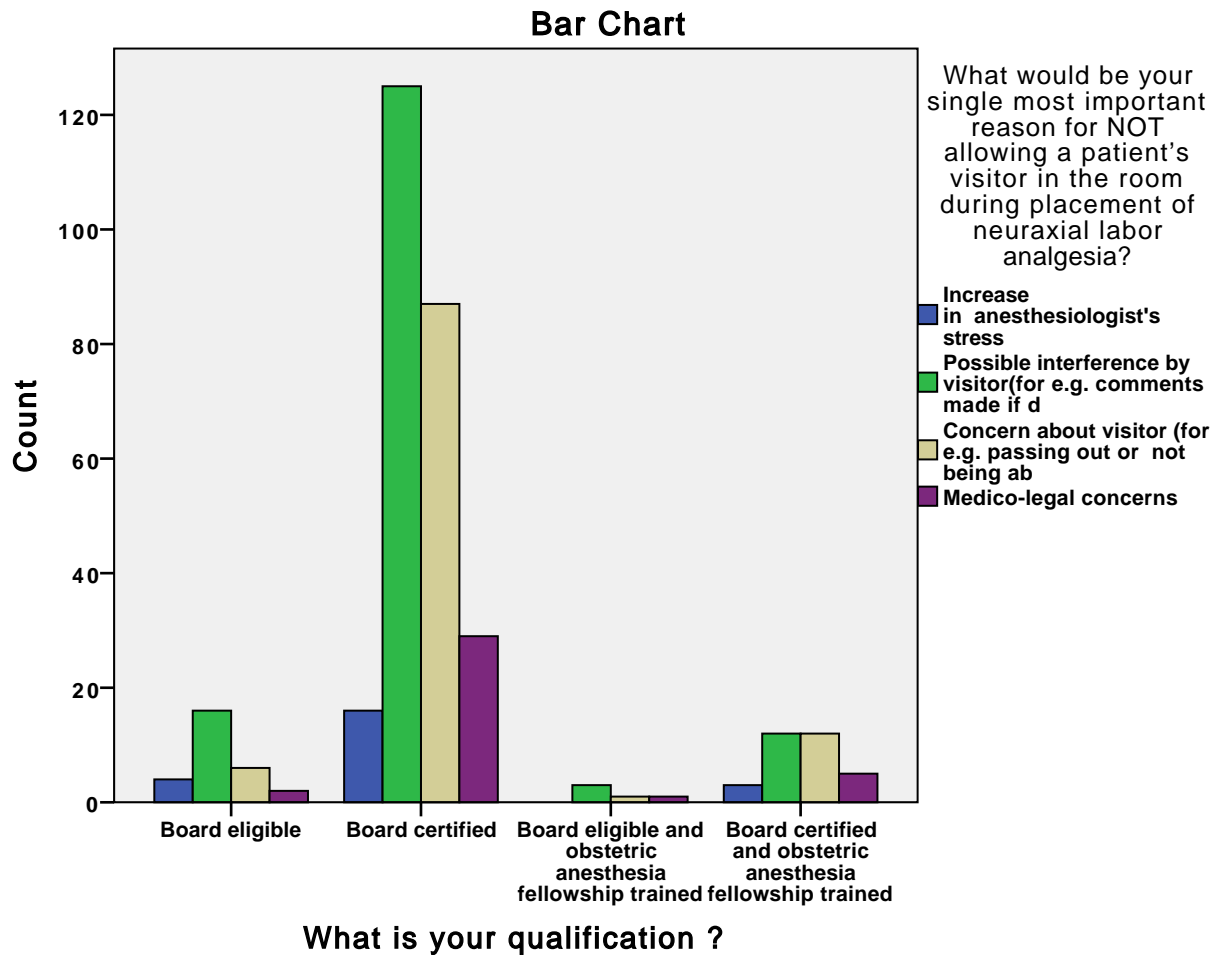

**Which region of USA do you practice in ? \* What is your preferred technique for neuraxial labor analgesia in an otherwise healthy parturient?**

**Crosstab**

|                                          |           |                                                   | What is your preferred technique for neuraxial labor analgesia in an otherwise healthy parturient? |                                    | Total  |
|------------------------------------------|-----------|---------------------------------------------------|----------------------------------------------------------------------------------------------------|------------------------------------|--------|
|                                          |           |                                                   | Epidural analgesia                                                                                 | Combined spinal epidural analgesia |        |
| Which region of USA do you practice in ? | Northeast | Count                                             | 417                                                                                                | 128                                | 545    |
|                                          |           | % within Which region of USA do you practice in ? | 76.5%                                                                                              | 23.5%                              | 100.0% |
|                                          |           | Adjusted Residual                                 | -1.1                                                                                               | 1.1                                |        |
|                                          | Midwest   | Count                                             | 218                                                                                                | 67                                 | 285    |
|                                          |           | % within Which region of USA do you practice in ? | 76.5%                                                                                              | 23.5%                              | 100.0% |
|                                          |           | Adjusted Residual                                 | -.7                                                                                                | .7                                 |        |
|                                          | South     | Count                                             | 197                                                                                                | 44                                 | 241    |
|                                          |           | % within Which region of USA do you practice in ? | 81.7%                                                                                              | 18.3%                              | 100.0% |
|                                          |           | Adjusted Residual                                 | 1.5                                                                                                | -1.5                               |        |
|                                          | West      | Count                                             | 183                                                                                                | 47                                 | 230    |
|                                          |           | % within Which region of USA do you practice in ? | 79.6%                                                                                              | 20.4%                              | 100.0% |
|                                          |           | Adjusted Residual                                 | .6                                                                                                 | -.6                                |        |
| Total                                    |           | Count                                             | 1015                                                                                               | 286                                | 1301   |
|                                          |           | % within Which region of USA do you practice in ? | 78.0%                                                                                              | 22.0%                              | 100.0% |

**Chi-Square Tests**

|                              | Value              | df | Asymp. Sig. (2-sided) |
|------------------------------|--------------------|----|-----------------------|
| Pearson Chi-Square           | 3.377 <sup>a</sup> | 3  | .337                  |
| Likelihood Ratio             | 3.453              | 3  | .327                  |
| Linear-by-Linear Association | 2.038              | 1  | .153                  |
| N of Valid Cases             | 1301               |    |                       |

a. 0 cells (0.0%) have expected count less than 5. The minimum expected count is 50.56.



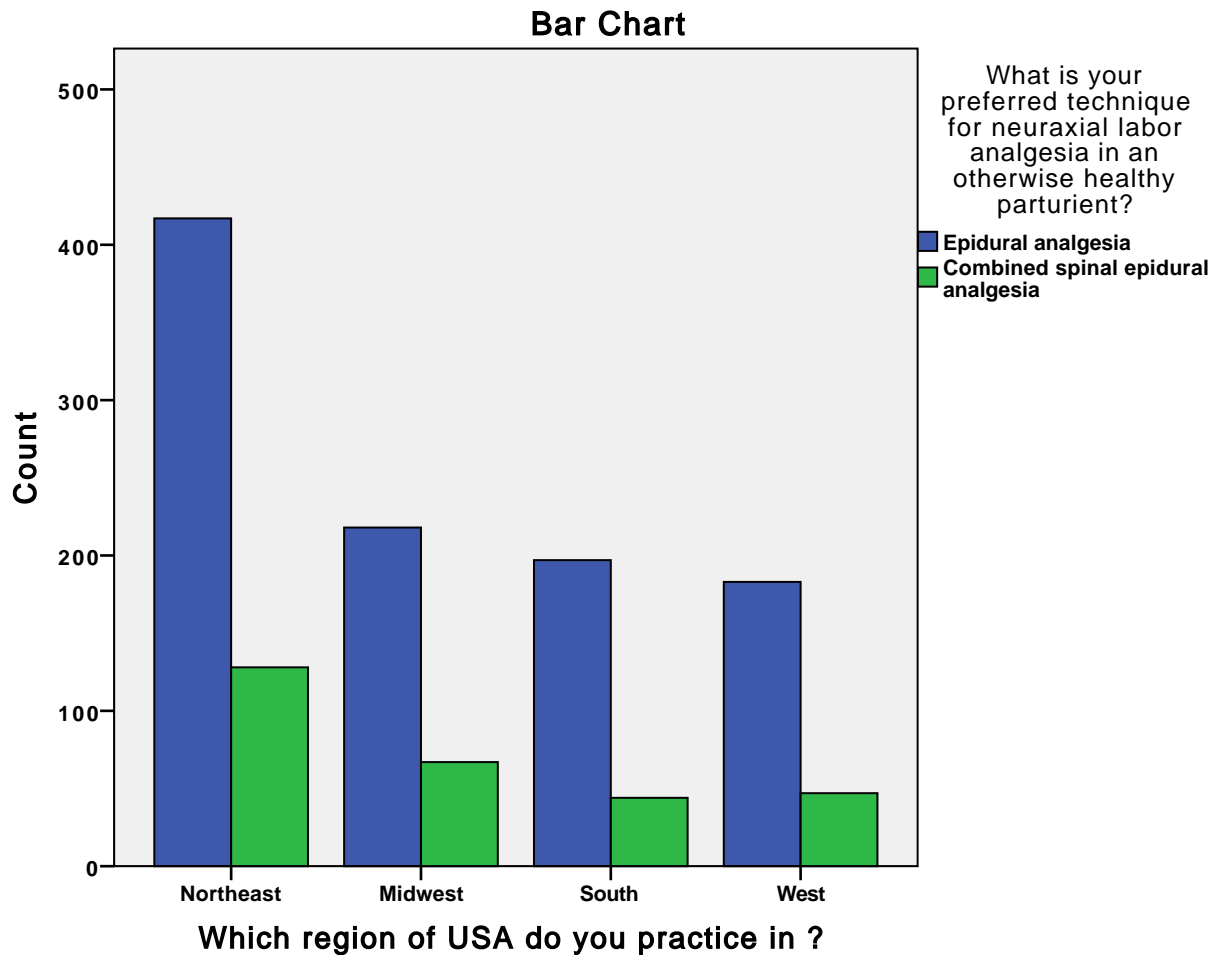

**Which region of USA do you practice in ? \* Does your practice or hospital have a written policy regarding allowing a patient's visitor in the room during placement of neuraxial labor analgesia?**

Crosstab

|                                          |           |                                                   | Does your practice or hospital have a written policy regarding allowing a patient's visitor in the room during placement of neuraxial labor . |                                                        |                          |
|------------------------------------------|-----------|---------------------------------------------------|-----------------------------------------------------------------------------------------------------------------------------------------------|--------------------------------------------------------|--------------------------|
|                                          |           |                                                   | Yes, a written policy exists - Allows visitors                                                                                                | Yes, a written policy exists - Does not allow visitors | No written policy exists |
| Which region of USA do you practice in ? | Northeast | Count                                             | 99                                                                                                                                            | 54                                                     | 227                      |
|                                          |           | % within Which region of USA do you practice in ? | 18.2%                                                                                                                                         | 9.9%                                                   | 41.7%                    |
|                                          |           | Adjusted Residual                                 | -3.2                                                                                                                                          | 2.1                                                    | 1.4                      |
|                                          | Midwest   | Count                                             | 67                                                                                                                                            | 26                                                     | 123                      |
|                                          |           | % within Which region of USA do you practice in ? | 23.5%                                                                                                                                         | 9.1%                                                   | 43.2%                    |
|                                          |           | Adjusted Residual                                 | .5                                                                                                                                            | .7                                                     | 1.5                      |
|                                          | South     | Count                                             | 60                                                                                                                                            | 18                                                     | 79                       |
|                                          |           | % within Which region of USA do you practice in ? | 24.9%                                                                                                                                         | 7.5%                                                   | 32.8%                    |
|                                          |           | Adjusted Residual                                 | 1.0                                                                                                                                           | -.4                                                    | -2.3                     |
|                                          | West      | Count                                             | 67                                                                                                                                            | 7                                                      | 84                       |
|                                          |           | % within Which region of USA do you practice in ? | 29.1%                                                                                                                                         | 3.0%                                                   | 36.5%                    |
|                                          |           | Adjusted Residual                                 | 2.6                                                                                                                                           | -3.1                                                   | -1.0                     |
| Total                                    |           | Count                                             | 293                                                                                                                                           | 105                                                    | 513                      |
|                                          |           | % within Which region of USA do you practice in ? | 22.5%                                                                                                                                         | 8.1%                                                   | 39.4%                    |

**Crosstab**

|                                          |           |                                                   | Does your practice or hospital have a ... |        |
|------------------------------------------|-----------|---------------------------------------------------|-------------------------------------------|--------|
|                                          |           |                                                   |                                           |        |
|                                          |           |                                                   | I do not know                             | Total  |
| Which region of USA do you practice in ? | Northeast | Count                                             | 165                                       | 545    |
|                                          |           | % within Which region of USA do you practice in ? | 30.3%                                     | 100.0% |
|                                          |           | Adjusted Residual                                 | .2                                        |        |
|                                          | Midwest   | Count                                             | 69                                        | 285    |
|                                          |           | % within Which region of USA do you practice in ? | 24.2%                                     | 100.0% |
|                                          |           | Adjusted Residual                                 | -2.4                                      |        |
|                                          | South     | Count                                             | 84                                        | 241    |
|                                          |           | % within Which region of USA do you practice in ? | 34.9%                                     | 100.0% |
|                                          |           | Adjusted Residual                                 | 1.8                                       |        |
|                                          | West      | Count                                             | 72                                        | 230    |
|                                          |           | % within Which region of USA do you practice in ? | 31.3%                                     | 100.0% |
|                                          |           | Adjusted Residual                                 | .5                                        |        |
| Total                                    |           | Count                                             | 390                                       | 1301   |
|                                          |           | % within Which region of USA do you practice in ? | 30.0%                                     | 100.0% |

**Chi-Square Tests**

|                              | Value               | df | Asymp. Sig. (2-sided) |
|------------------------------|---------------------|----|-----------------------|
| Pearson Chi-Square           | 29.870 <sup>a</sup> | 9  | .000                  |
| Likelihood Ratio             | 32.158              | 9  | .000                  |
| Linear-by-Linear Association | 2.290               | 1  | .130                  |
| N of Valid Cases             | 1301                |    |                       |

a. 0 cells (0.0%) have expected count less than 5. The minimum expected count is 18.56.

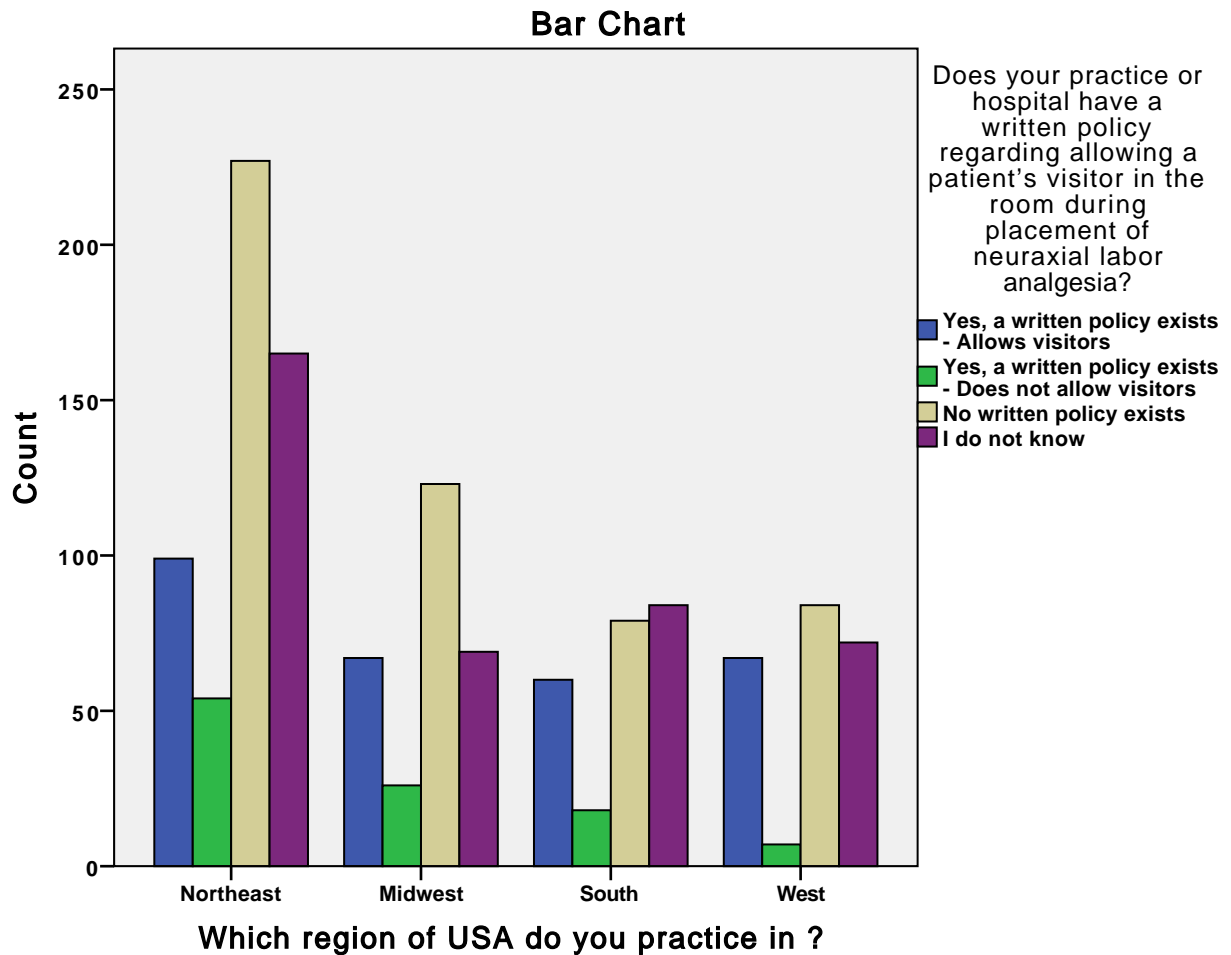

**Which region of USA do you practice in ? \* If no policy existed, would you be open to allowing a patient's visitor in the room during placement of neuraxial labor analgesia?**

**Crosstab**

|                                          |           |                                                   | If no policy existed, would you be open to allowing a patient's visitor in the room during placement of neuraxial labor analgesia? |       |        |
|------------------------------------------|-----------|---------------------------------------------------|------------------------------------------------------------------------------------------------------------------------------------|-------|--------|
|                                          |           |                                                   | Yes                                                                                                                                | No    | Total  |
| Which region of USA do you practice in ? | Northeast | Count                                             | 361                                                                                                                                | 184   | 545    |
|                                          |           | % within Which region of USA do you practice in ? | 66.2%                                                                                                                              | 33.8% | 100.0% |
|                                          |           | Adjusted Residual                                 | -6.3                                                                                                                               | 6.3   |        |
|                                          | Midwest   | Count                                             | 233                                                                                                                                | 52    | 285    |
|                                          |           | % within Which region of USA do you practice in ? | 81.8%                                                                                                                              | 18.2% | 100.0% |
|                                          |           | Adjusted Residual                                 | 2.9                                                                                                                                | -2.9  |        |
|                                          | South     | Count                                             | 181                                                                                                                                | 60    | 241    |
|                                          |           | % within Which region of USA do you practice in ? | 75.1%                                                                                                                              | 24.9% | 100.0% |
|                                          |           | Adjusted Residual                                 | .0                                                                                                                                 | .0    |        |
|                                          | West      | Count                                             | 202                                                                                                                                | 28    | 230    |
|                                          |           | % within Which region of USA do you practice in ? | 87.8%                                                                                                                              | 12.2% | 100.0% |
|                                          |           | Adjusted Residual                                 | 4.9                                                                                                                                | -4.9  |        |
| Total                                    |           | Count                                             | 977                                                                                                                                | 324   | 1301   |
|                                          |           | % within Which region of USA do you practice in ? | 75.1%                                                                                                                              | 24.9% | 100.0% |

**Chi-Square Tests**

|                              | Value               | df | Asymp. Sig. (2-sided) |
|------------------------------|---------------------|----|-----------------------|
| Pearson Chi-Square           | 49.549 <sup>a</sup> | 3  | .000                  |
| Likelihood Ratio             | 51.780              | 3  | .000                  |
| Linear-by-Linear Association | 36.153              | 1  | .000                  |
| N of Valid Cases             | 1301                |    |                       |

a. 0 cells (0.0%) have expected count less than 5. The minimum expected count is 57.28.

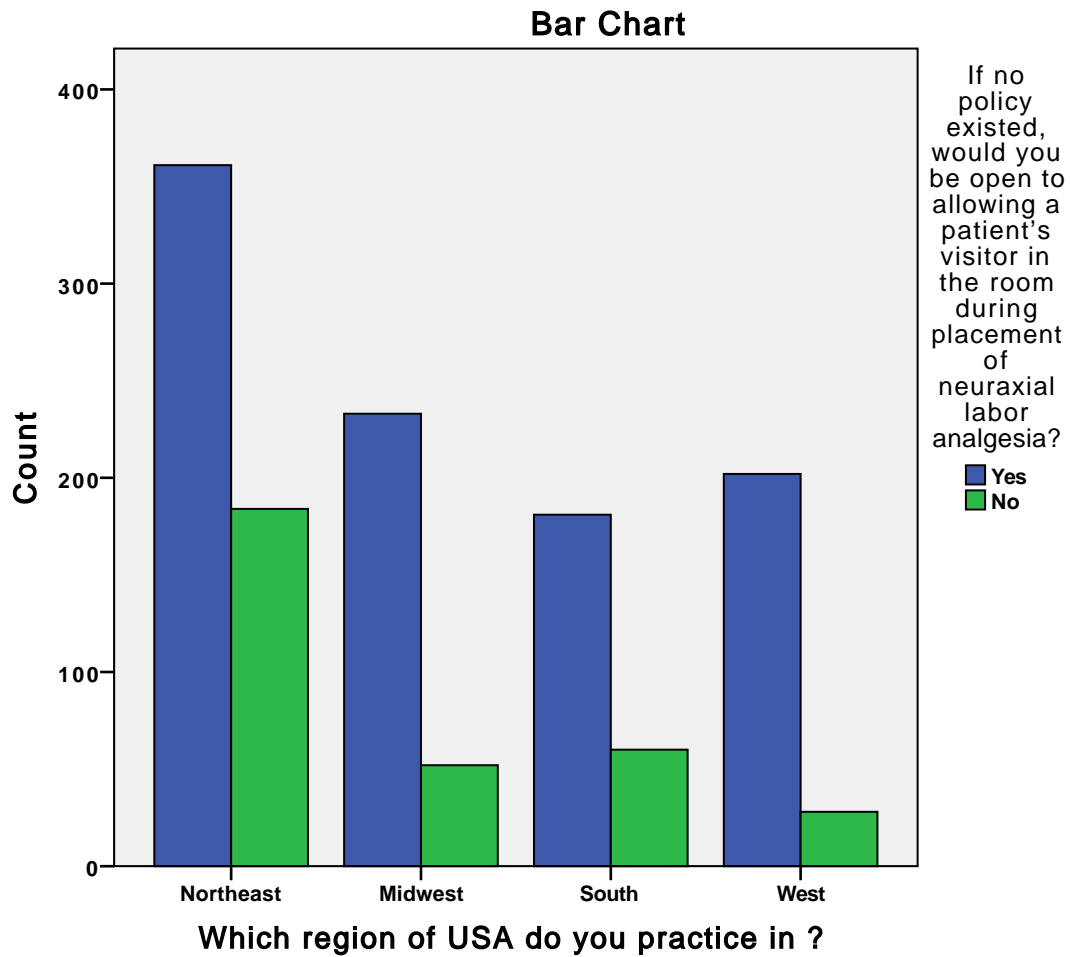

**Which region of USA do you practice in ? \* If you allowed a visitor in the room during placement of neuraxial labor analgesia, you would want the**

**Crosstab**

|                                          |           |                                                   | If you allowed a visitor in the room during placement of neuraxial labor analgesia, you would want the |                        |                 |
|------------------------------------------|-----------|---------------------------------------------------|--------------------------------------------------------------------------------------------------------|------------------------|-----------------|
|                                          |           |                                                   | Visitor always standing                                                                                | Visitor always sitting | Does not matter |
| Which region of USA do you practice in ? | Northeast | Count                                             | 4                                                                                                      | 245                    | 110             |
|                                          |           | % within Which region of USA do you practice in ? | 1.1%                                                                                                   | 68.2%                  | 30.6%           |
|                                          |           | Adjusted Residual                                 | -.7                                                                                                    | -2.0                   | 2.2             |
|                                          | Midwest   | Count                                             | 4                                                                                                      | 166                    | 62              |
|                                          |           | % within Which region of USA do you practice in ? | 1.7%                                                                                                   | 71.6%                  | 26.7%           |
|                                          |           | Adjusted Residual                                 | .4                                                                                                     | -.2                    | .1              |
|                                          | South     | Count                                             | 6                                                                                                      | 129                    | 46              |
|                                          |           | % within Which region of USA do you practice in ? | 3.3%                                                                                                   | 71.3%                  | 25.4%           |
|                                          |           | Adjusted Residual                                 | 2.3                                                                                                    | -.3                    | -.4             |
|                                          | West      | Count                                             | 0                                                                                                      | 161                    | 40              |
|                                          |           | % within Which region of USA do you practice in ? | 0.0%                                                                                                   | 80.1%                  | 19.9%           |
|                                          |           | Adjusted Residual                                 | -1.9                                                                                                   | 2.9                    | -2.4            |
| Total                                    |           | Count                                             | 14                                                                                                     | 701                    | 258             |
|                                          |           | % within Which region of USA do you practice in ? | 1.4%                                                                                                   | 72.0%                  | 26.5%           |

**Crosstab**

|                                                 |                  |                                                                                 |               |
|-------------------------------------------------|------------------|---------------------------------------------------------------------------------|---------------|
|                                                 |                  |                                                                                 | <b>Total</b>  |
| <b>Which region of USA do you practice in ?</b> | <b>Northeast</b> | Count<br>% within Which region of USA do you practice in ?<br>Adjusted Residual | 359<br>100.0% |
|                                                 | <b>Midwest</b>   | Count<br>% within Which region of USA do you practice in ?<br>Adjusted Residual | 232<br>100.0% |
|                                                 | <b>South</b>     | Count<br>% within Which region of USA do you practice in ?<br>Adjusted Residual | 181<br>100.0% |
|                                                 | <b>West</b>      | Count<br>% within Which region of USA do you practice in ?<br>Adjusted Residual | 201<br>100.0% |
|                                                 | <b>Total</b>     | Count<br>% within Which region of USA do you practice in ?                      | 973<br>100.0% |

**Chi-Square Tests**

|                                     | Value               | df | Asymp. Sig. (2-sided) |
|-------------------------------------|---------------------|----|-----------------------|
| <b>Pearson Chi-Square</b>           | 15.974 <sup>a</sup> | 6  | .014                  |
| <b>Likelihood Ratio</b>             | 17.832              | 6  | .007                  |
| <b>Linear-by-Linear Association</b> | 6.345               | 1  | .012                  |
| <b>N of Valid Cases</b>             | 973                 |    |                       |

a. 3 cells (25.0%) have expected count less than 5. The minimum expected count is 2.60.



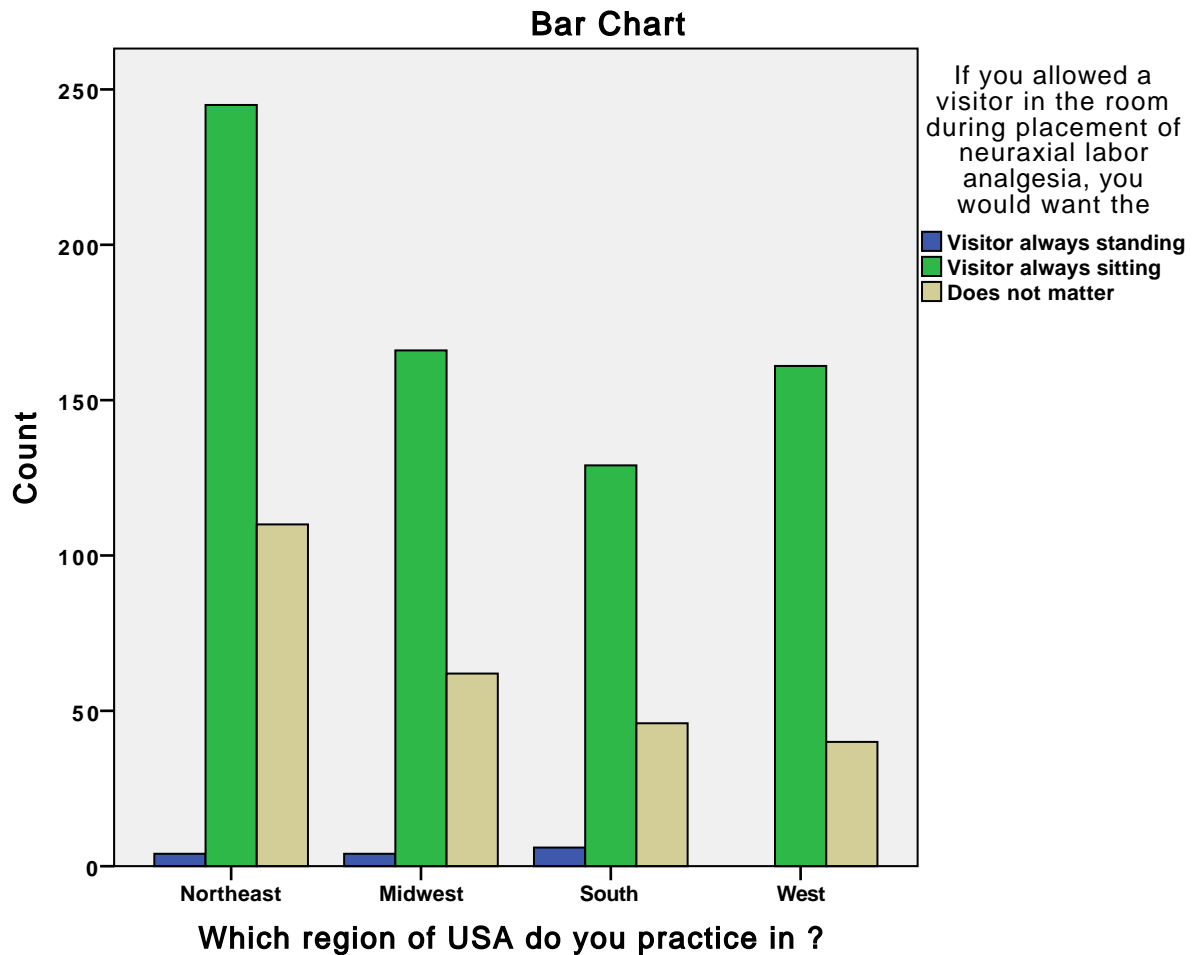

**Which region of USA do you practice in ? \* If you allowed a visitor in the room during placement of neuraxial labor analgesia, you would want the visitor to be positioned such that,**

Crosstab

|                                          |           |                                                   | If you allowed a visitor in the room during placement of neuraxial labor analgesia, you would want the visitor to be positioned such that, |                                                              |                 |
|------------------------------------------|-----------|---------------------------------------------------|--------------------------------------------------------------------------------------------------------------------------------------------|--------------------------------------------------------------|-----------------|
|                                          |           |                                                   | Visitor has no view of procedure (patient is in between anes                                                                               | Visitor has partial view of workspace (but cannot see patien | Does not matter |
| Which region of USA do you practice in ? | Northeast | Count                                             | 234                                                                                                                                        | 71                                                           | 54              |
|                                          |           | % within Which region of USA do you practice in ? | 65.2%                                                                                                                                      | 19.8%                                                        | 15.0%           |
|                                          |           | Adjusted Residual                                 | 2.0                                                                                                                                        | .5                                                           | -2.9            |
|                                          | Midwest   | Count                                             | 128                                                                                                                                        | 45                                                           | 59              |
|                                          |           | % within Which region of USA do you practice in ? | 55.2%                                                                                                                                      | 19.4%                                                        | 25.4%           |
|                                          |           | Adjusted Residual                                 | -2.1                                                                                                                                       | .2                                                           | 2.4             |
|                                          | South     | Count                                             | 116                                                                                                                                        | 36                                                           | 29              |
|                                          |           | % within Which region of USA do you practice in ? | 64.1%                                                                                                                                      | 19.9%                                                        | 16.0%           |
|                                          |           | Adjusted Residual                                 | .9                                                                                                                                         | .3                                                           | -1.5            |
|                                          | West      | Count                                             | 116                                                                                                                                        | 33                                                           | 52              |
|                                          |           | % within Which region of USA do you practice in ? | 57.7%                                                                                                                                      | 16.4%                                                        | 25.9%           |
|                                          |           | Adjusted Residual                                 | -1.1                                                                                                                                       | -1.1                                                         | 2.4             |
| Total                                    |           | Count                                             | 594                                                                                                                                        | 185                                                          | 194             |
|                                          |           | % within Which region of USA do you practice in ? | 61.0%                                                                                                                                      | 19.0%                                                        | 19.9%           |

**Crosstab**

|                                                 |                  |                                                                                                      |                             |
|-------------------------------------------------|------------------|------------------------------------------------------------------------------------------------------|-----------------------------|
|                                                 |                  |                                                                                                      | <b>Total</b>                |
| <b>Which region of USA do you practice in ?</b> | <b>Northeast</b> | <b>Count</b><br><b>% within Which region of USA do you practice in ?</b><br><b>Adjusted Residual</b> | <b>359</b><br><b>100.0%</b> |
|                                                 | <b>Midwest</b>   | <b>Count</b><br><b>% within Which region of USA do you practice in ?</b><br><b>Adjusted Residual</b> | <b>232</b><br><b>100.0%</b> |
|                                                 | <b>South</b>     | <b>Count</b><br><b>% within Which region of USA do you practice in ?</b><br><b>Adjusted Residual</b> | <b>181</b><br><b>100.0%</b> |
|                                                 | <b>West</b>      | <b>Count</b><br><b>% within Which region of USA do you practice in ?</b><br><b>Adjusted Residual</b> | <b>201</b><br><b>100.0%</b> |
|                                                 | <b>Total</b>     | <b>Count</b><br><b>% within Which region of USA do you practice in ?</b>                             | <b>973</b><br><b>100.0%</b> |

**Chi-Square Tests**

|                                     | <b>Value</b>              | <b>df</b> | <b>Asymp. Sig. (2-sided)</b> |
|-------------------------------------|---------------------------|-----------|------------------------------|
| <b>Pearson Chi-Square</b>           | <b>16.638<sup>a</sup></b> | <b>6</b>  | <b>.011</b>                  |
| <b>Likelihood Ratio</b>             | <b>16.609</b>             | <b>6</b>  | <b>.011</b>                  |
| <b>Linear-by-Linear Association</b> | <b>3.930</b>              | <b>1</b>  | <b>.047</b>                  |
| <b>N of Valid Cases</b>             | <b>973</b>                |           |                              |

a. 0 cells (0.0%) have expected count less than 5. The minimum expected count is 34.41.

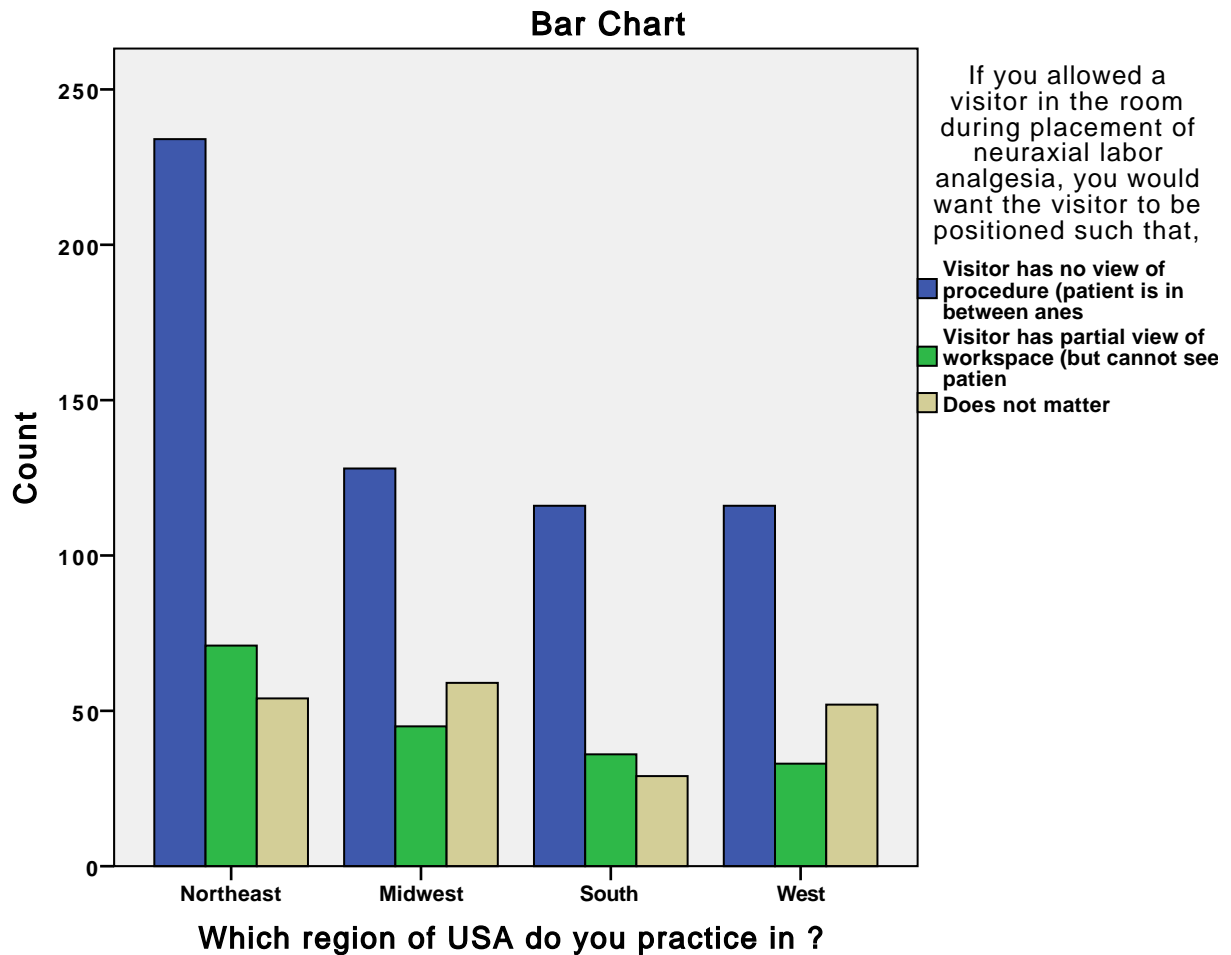

**Which region of USA do you practice in ? \* What would be your single most important reason for allowing a patient's visitor in the room during placement of neuraxial labor analgesia?**

Crosstab

|                                          |           |                                                   | What would be your single most important reason for allowing a patient's visitor in the room during placement of neuraxial labor ... |                                                               |                                                               |
|------------------------------------------|-----------|---------------------------------------------------|--------------------------------------------------------------------------------------------------------------------------------------|---------------------------------------------------------------|---------------------------------------------------------------|
|                                          |           |                                                   | It would likely reduce patient's anxiety                                                                                             | It would likely reduce visitor's anxiety (for e. g. if visito | Visitor's assistance needed (for e. g. if visitor were a doul |
| Which region of USA do you practice in ? | Northeast | Count                                             | 230                                                                                                                                  | 21                                                            | 19                                                            |
|                                          |           | % within Which region of USA do you practice in ? | 64.1%                                                                                                                                | 5.8%                                                          | 5.3%                                                          |
|                                          |           | Adjusted Residual                                 | -.3                                                                                                                                  | .9                                                            | 1.9                                                           |
|                                          | Midwest   | Count                                             | 140                                                                                                                                  | 12                                                            | 7                                                             |
|                                          |           | % within Which region of USA do you practice in ? | 60.3%                                                                                                                                | 5.2%                                                          | 3.0%                                                          |
|                                          |           | Adjusted Residual                                 | -1.6                                                                                                                                 | .1                                                            | -.7                                                           |
|                                          | South     | Count                                             | 120                                                                                                                                  | 8                                                             | 7                                                             |
|                                          |           | % within Which region of USA do you practice in ? | 66.3%                                                                                                                                | 4.4%                                                          | 3.9%                                                          |
|                                          |           | Adjusted Residual                                 | .5                                                                                                                                   | -.4                                                           | .1                                                            |
|                                          | West      | Count                                             | 139                                                                                                                                  | 8                                                             | 4                                                             |
|                                          |           | % within Which region of USA do you practice in ? | 69.2%                                                                                                                                | 4.0%                                                          | 2.0%                                                          |
|                                          |           | Adjusted Residual                                 | 1.5                                                                                                                                  | -.8                                                           | -1.5                                                          |
| Total                                    |           | Count                                             | 629                                                                                                                                  | 49                                                            | 37                                                            |
|                                          |           | % within Which region of USA do you practice in ? | 64.6%                                                                                                                                | 5.0%                                                          | 3.8%                                                          |

**Crosstab**

|                                                |           |                                                         | What would be<br>your single<br>most important ... |        |
|------------------------------------------------|-----------|---------------------------------------------------------|----------------------------------------------------|--------|
|                                                |           |                                                         | To fulfill<br>patient's<br>request                 |        |
|                                                |           |                                                         | Total                                              |        |
| Which region<br>of USA do you<br>practice in ? | Northeast | Count                                                   | 89                                                 | 359    |
|                                                |           | % within Which<br>region of USA do<br>you practice in ? | 24.8%                                              | 100.0% |
|                                                |           | Adjusted Residual                                       | - .9                                               |        |
|                                                | Midwest   | Count                                                   | 73                                                 | 232    |
|                                                |           | % within Which<br>region of USA do<br>you practice in ? | 31.5%                                              | 100.0% |
|                                                |           | Adjusted Residual                                       | 2.0                                                |        |
|                                                | South     | Count                                                   | 46                                                 | 181    |
|                                                |           | % within Which<br>region of USA do<br>you practice in ? | 25.4%                                              | 100.0% |
|                                                |           | Adjusted Residual                                       | - .4                                               |        |
|                                                | West      | Count                                                   | 50                                                 | 201    |
|                                                |           | % within Which<br>region of USA do<br>you practice in ? | 24.9%                                              | 100.0% |
|                                                |           | Adjusted Residual                                       | - .6                                               |        |
| Total                                          |           | Count                                                   | 258                                                | 973    |
|                                                |           | % within Which<br>region of USA do<br>you practice in ? | 26.5%                                              | 100.0% |

**Chi-Square Tests**

|                              | Value              | df | Asymp. Sig. (2-sided) |
|------------------------------|--------------------|----|-----------------------|
| Pearson Chi-Square           | 9.496 <sup>a</sup> | 9  | .393                  |
| Likelihood Ratio             | 9.575              | 9  | .386                  |
| Linear-by-Linear Association | .729               | 1  | .393                  |
| N of Valid Cases             | 973                |    |                       |

a. 0 cells (0.0%) have expected count less than 5. The minimum expected count is 6.88.

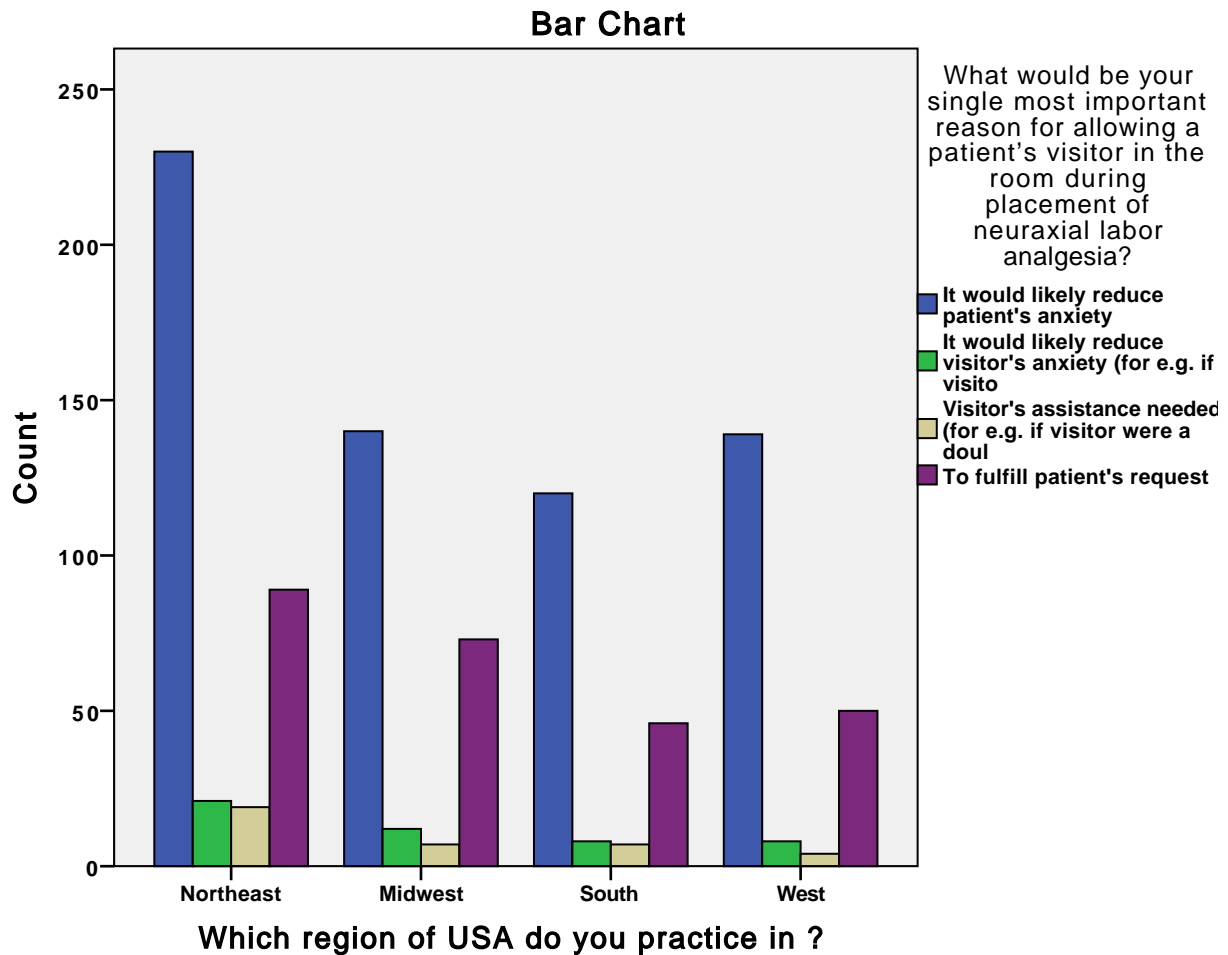

**Which region of USA do you practice in ? \* How often has another non anesthesia member of the labor and delivery team (for example obstetrician or nurse) attempted to influence your decision to have a visitor present during placement of neuraxial labor analgesia?**

**Crosstab**

|                                          |           |                                                   | How often has another non anesthesia member of the labor and delivery team (for example obstetrician or nurse) attempted to influence your decision to have a visitor present during placement of neuraxial labor analgesia? |                           |              |
|------------------------------------------|-----------|---------------------------------------------------|------------------------------------------------------------------------------------------------------------------------------------------------------------------------------------------------------------------------------|---------------------------|--------------|
|                                          |           |                                                   | Rarely (< 5 %)                                                                                                                                                                                                               | Occasionally (5 % - 40 %) | Often > 40 % |
| Which region of USA do you practice in ? | Northeast | Count                                             | 259                                                                                                                                                                                                                          | 70                        | 30           |
|                                          |           | % within Which region of USA do you practice in ? | 72.1%                                                                                                                                                                                                                        | 19.5%                     | 8.4%         |
|                                          |           | Adjusted Residual                                 | -.8                                                                                                                                                                                                                          | .9                        | .1           |
|                                          | Midwest   | Count                                             | 173                                                                                                                                                                                                                          | 43                        | 16           |
|                                          |           | % within Which region of USA do you practice in ? | 74.6%                                                                                                                                                                                                                        | 18.5%                     | 6.9%         |
|                                          |           | Adjusted Residual                                 | .3                                                                                                                                                                                                                           | .2                        | -.8          |
|                                          | South     | Count                                             | 135                                                                                                                                                                                                                          | 29                        | 17           |
|                                          |           | % within Which region of USA do you practice in ? | 74.6%                                                                                                                                                                                                                        | 16.0%                     | 9.4%         |
|                                          |           | Adjusted Residual                                 | .3                                                                                                                                                                                                                           | -.8                       | .6           |
|                                          | West      | Count                                             | 150                                                                                                                                                                                                                          | 34                        | 17           |
|                                          |           | % within Which region of USA do you practice in ? | 74.6%                                                                                                                                                                                                                        | 16.9%                     | 8.5%         |
|                                          |           | Adjusted Residual                                 | .3                                                                                                                                                                                                                           | -.5                       | .1           |
| Total                                    |           | Count                                             | 717                                                                                                                                                                                                                          | 176                       | 80           |
|                                          |           | % within Which region of USA do you practice in ? | 73.7%                                                                                                                                                                                                                        | 18.1%                     | 8.2%         |



**Crosstab**

|                                                 |                  |                                                                                                      |                             |
|-------------------------------------------------|------------------|------------------------------------------------------------------------------------------------------|-----------------------------|
|                                                 |                  |                                                                                                      | <b>Total</b>                |
| <b>Which region of USA do you practice in ?</b> | <b>Northeast</b> | <b>Count</b><br><b>% within Which region of USA do you practice in ?</b><br><b>Adjusted Residual</b> | <b>359</b><br><b>100.0%</b> |
|                                                 | <b>Midwest</b>   | <b>Count</b><br><b>% within Which region of USA do you practice in ?</b><br><b>Adjusted Residual</b> | <b>232</b><br><b>100.0%</b> |
|                                                 | <b>South</b>     | <b>Count</b><br><b>% within Which region of USA do you practice in ?</b><br><b>Adjusted Residual</b> | <b>181</b><br><b>100.0%</b> |
|                                                 | <b>West</b>      | <b>Count</b><br><b>% within Which region of USA do you practice in ?</b><br><b>Adjusted Residual</b> | <b>201</b><br><b>100.0%</b> |
|                                                 | <b>Total</b>     | <b>Count</b><br><b>% within Which region of USA do you practice in ?</b>                             | <b>973</b><br><b>100.0%</b> |

**Chi-Square Tests**

|                                     | <b>Value</b>             | <b>df</b> | <b>Asymp. Sig. (2-sided)</b> |
|-------------------------------------|--------------------------|-----------|------------------------------|
| <b>Pearson Chi-Square</b>           | <b>2.003<sup>a</sup></b> | <b>6</b>  | <b>.919</b>                  |
| <b>Likelihood Ratio</b>             | <b>2.030</b>             | <b>6</b>  | <b>.917</b>                  |
| <b>Linear-by-Linear Association</b> | <b>.138</b>              | <b>1</b>  | <b>.710</b>                  |
| <b>N of Valid Cases</b>             | <b>973</b>               |           |                              |

a. 0 cells (0.0%) have expected count less than 5. The minimum expected count is 14.88.

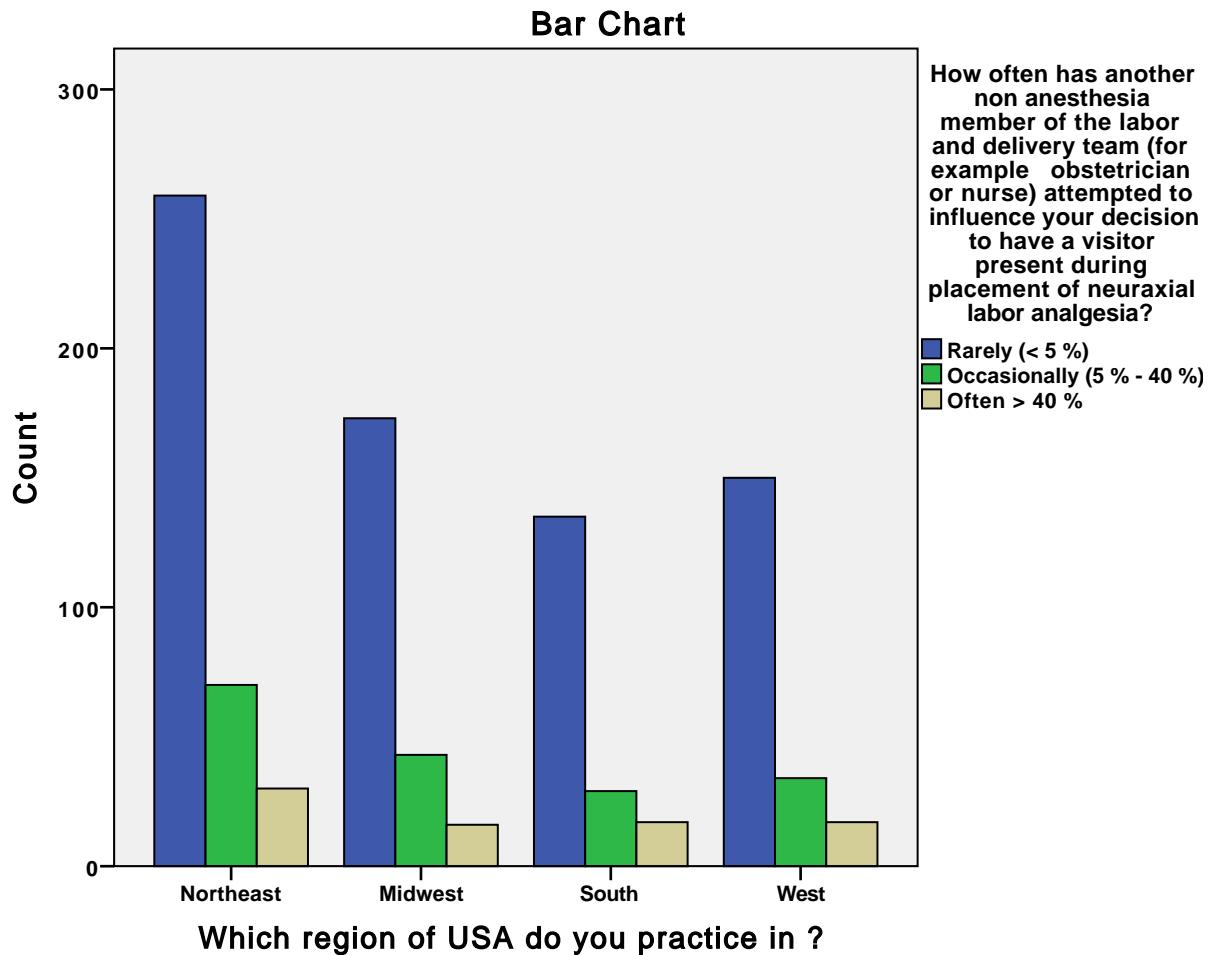

**Which region of USA do you practice in ? \* How often has another non anesthesia member of the labor and delivery team (for example obstetrician or nurse) attempted to influence your decision to NOT have a visitor present during placement of neuraxial labor analgesia?**

**Crosstab**

|                                          |           |                                                   | How often has another non anesthesia member of the labor and delivery team (for example obstetrician or nurse) attempted to influence your decision to NOT have a visitor present during placement of neuraxial labor analgesia? |                       |              |
|------------------------------------------|-----------|---------------------------------------------------|----------------------------------------------------------------------------------------------------------------------------------------------------------------------------------------------------------------------------------|-----------------------|--------------|
|                                          |           |                                                   | Rarely < 5 %                                                                                                                                                                                                                     | Occasionally 5 - 40 % | Often > 40 % |
| Which region of USA do you practice in ? | Northeast | Count                                             | 146                                                                                                                                                                                                                              | 27                    | 9            |
|                                          |           | % within Which region of USA do you practice in ? | 80.2%                                                                                                                                                                                                                            | 14.8%                 | 4.9%         |
|                                          |           | Adjusted Residual                                 | .8                                                                                                                                                                                                                               | -.6                   | -.6          |
|                                          | Midwest   | Count                                             | 38                                                                                                                                                                                                                               | 10                    | 3            |
|                                          |           | % within Which region of USA do you practice in ? | 74.5%                                                                                                                                                                                                                            | 19.6%                 | 5.9%         |
|                                          |           | Adjusted Residual                                 | -.8                                                                                                                                                                                                                              | .8                    | .1           |
|                                          | South     | Count                                             | 48                                                                                                                                                                                                                               | 9                     | 4            |
|                                          |           | % within Which region of USA do you practice in ? | 78.7%                                                                                                                                                                                                                            | 14.8%                 | 6.6%         |
|                                          |           | Adjusted Residual                                 | .0                                                                                                                                                                                                                               | -.3                   | .4           |
|                                          | West      | Count                                             | 21                                                                                                                                                                                                                               | 5                     | 2            |
|                                          |           | % within Which region of USA do you practice in ? | 75.0%                                                                                                                                                                                                                            | 17.9%                 | 7.1%         |
|                                          |           | Adjusted Residual                                 | -.5                                                                                                                                                                                                                              | .3                    | .4           |
| Total                                    |           | Count                                             | 253                                                                                                                                                                                                                              | 51                    | 18           |
|                                          |           | % within Which region of USA do you practice in ? | 78.6%                                                                                                                                                                                                                            | 15.8%                 | 5.6%         |

**Crosstab**

|                                          |           |                                                                                 | Total         |
|------------------------------------------|-----------|---------------------------------------------------------------------------------|---------------|
| Which region of USA do you practice in ? | Northeast | Count<br>% within Which region of USA do you practice in ?<br>Adjusted Residual | 182<br>100.0% |
|                                          | Midwest   | Count<br>% within Which region of USA do you practice in ?<br>Adjusted Residual | 51<br>100.0%  |
|                                          | South     | Count<br>% within Which region of USA do you practice in ?<br>Adjusted Residual | 61<br>100.0%  |
|                                          | West      | Count<br>% within Which region of USA do you practice in ?<br>Adjusted Residual | 28<br>100.0%  |
|                                          | Total     | Count<br>% within Which region of USA do you practice in ?                      | 322<br>100.0% |

**Chi-Square Tests**

|                              | Value              | df | Asymp. Sig. (2-sided) |
|------------------------------|--------------------|----|-----------------------|
| Pearson Chi-Square           | 1.272 <sup>a</sup> | 6  | .973                  |
| Likelihood Ratio             | 1.233              | 6  | .975                  |
| Linear-by-Linear Association | .540               | 1  | .463                  |
| N of Valid Cases             | 322                |    |                       |

a. 4 cells (33.3%) have expected count less than 5. The minimum expected count is 1.57.

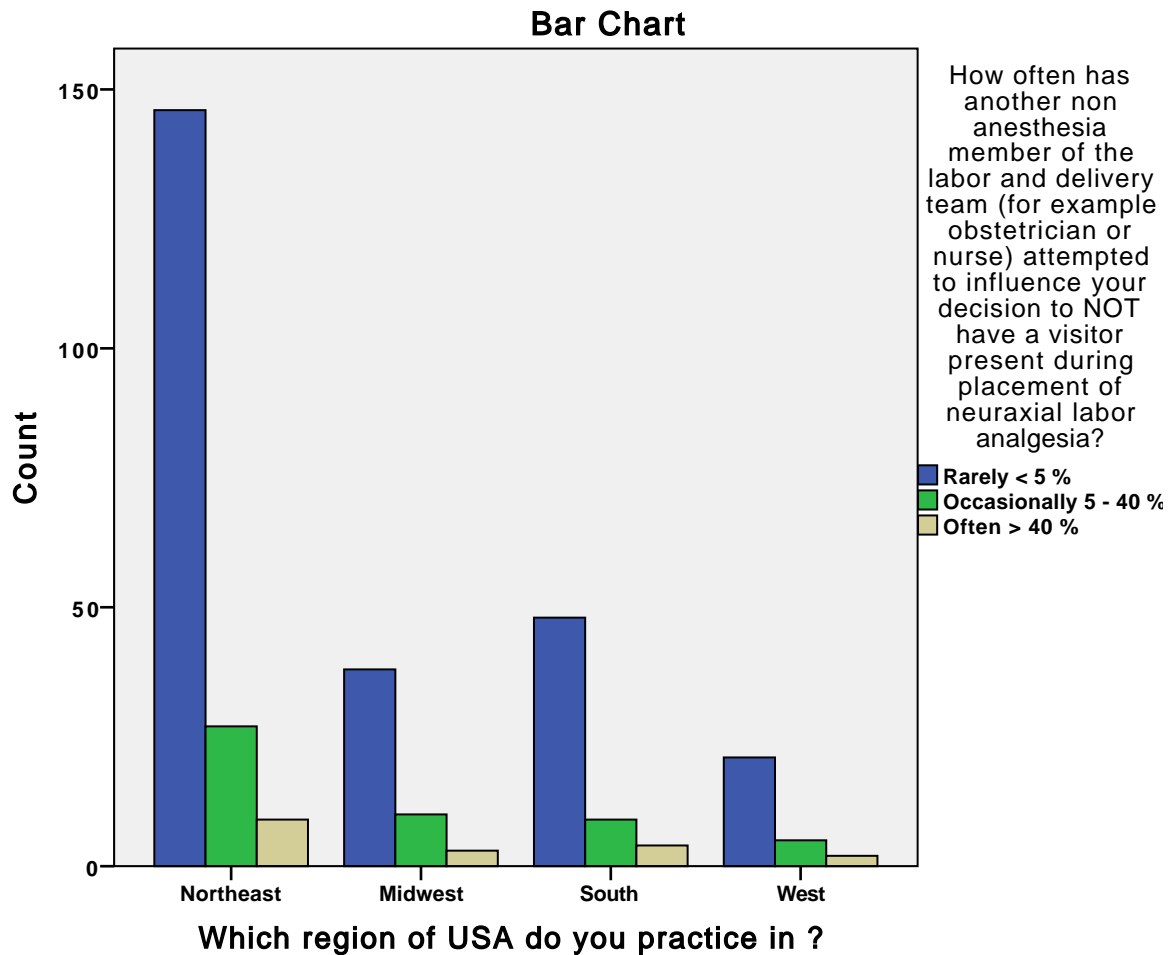

**Which region of USA do you practice in ? \* What would be your single most important reason for NOT allowing a patient's visitor in the room during placement of neuraxial labor analgesia?**

Crosstab

|                                          |           |                                                   | What would be your single most important reason for NOT allowing a patient's visitor in the room during placement of neuraxial labor . |                                                               |                                                             |
|------------------------------------------|-----------|---------------------------------------------------|----------------------------------------------------------------------------------------------------------------------------------------|---------------------------------------------------------------|-------------------------------------------------------------|
|                                          |           |                                                   | Increase in anesthesiologist's stress                                                                                                  | Possible interference by visitor (for e.g. comments made if d | Concern about visitor (for e.g. passing out or not being ab |
| Which region of USA do you practice in ? | Northeast | Count                                             | 12                                                                                                                                     | 85                                                            | 65                                                          |
|                                          |           | % within Which region of USA do you practice in ? | 6.6%                                                                                                                                   | 46.7%                                                         | 35.7%                                                       |
|                                          |           | Adjusted Residual                                 | -.4                                                                                                                                    | -.7                                                           | 1.2                                                         |
|                                          | Midwest   | Count                                             | 4                                                                                                                                      | 26                                                            | 16                                                          |
|                                          |           | % within Which region of USA do you practice in ? | 7.8%                                                                                                                                   | 51.0%                                                         | 31.4%                                                       |
|                                          |           | Adjusted Residual                                 | .2                                                                                                                                     | .4                                                            | -.3                                                         |
|                                          | South     | Count                                             | 2                                                                                                                                      | 32                                                            | 17                                                          |
|                                          |           | % within Which region of USA do you practice in ? | 3.3%                                                                                                                                   | 52.5%                                                         | 27.9%                                                       |
|                                          |           | Adjusted Residual                                 | -1.3                                                                                                                                   | .7                                                            | -.9                                                         |
|                                          | West      | Count                                             | 5                                                                                                                                      | 13                                                            | 8                                                           |
|                                          |           | % within Which region of USA do you practice in ? | 17.9%                                                                                                                                  | 46.4%                                                         | 28.6%                                                       |
|                                          |           | Adjusted Residual                                 | 2.3                                                                                                                                    | -.2                                                           | -.5                                                         |
| Total                                    |           | Count                                             | 23                                                                                                                                     | 156                                                           | 106                                                         |
|                                          |           | % within Which region of USA do you practice in ? | 7.1%                                                                                                                                   | 48.4%                                                         | 32.9%                                                       |

**Crosstab**

|                                                |           |                                                         | What would be<br>your single<br>most important ... |        |
|------------------------------------------------|-----------|---------------------------------------------------------|----------------------------------------------------|--------|
|                                                |           |                                                         | Medico-legal<br>concerns                           | Total  |
| Which region<br>of USA do you<br>practice in ? | Northeast | Count                                                   | 20                                                 | 182    |
|                                                |           | % within Which<br>region of USA do<br>you practice in ? | 11.0%                                              | 100.0% |
|                                                |           | Adjusted Residual                                       | - .3                                               |        |
|                                                | Midwest   | Count                                                   | 5                                                  | 51     |
|                                                |           | % within Which<br>region of USA do<br>you practice in ? | 9.8%                                               | 100.0% |
|                                                |           | Adjusted Residual                                       | - .4                                               |        |
|                                                | South     | Count                                                   | 10                                                 | 61     |
|                                                |           | % within Which<br>region of USA do<br>you practice in ? | 16.4%                                              | 100.0% |
|                                                |           | Adjusted Residual                                       | 1.3                                                |        |
|                                                | West      | Count                                                   | 2                                                  | 28     |
|                                                |           | % within Which<br>region of USA do<br>you practice in ? | 7.1%                                               | 100.0% |
|                                                |           | Adjusted Residual                                       | - .8                                               |        |
| Total                                          |           | Count                                                   | 37                                                 | 322    |
|                                                |           | % within Which<br>region of USA do<br>you practice in ? | 11.5%                                              | 100.0% |

**Chi-Square Tests**

|                              | Value              | df | Asymp. Sig. (2-sided) |
|------------------------------|--------------------|----|-----------------------|
| Pearson Chi-Square           | 9.300 <sup>a</sup> | 9  | .410                  |
| Likelihood Ratio             | 8.236              | 9  | .511                  |
| Linear-by-Linear Association | .710               | 1  | .400                  |
| N of Valid Cases             | 322                |    |                       |

a. 4 cells (25.0%) have expected count less than 5. The minimum expected count is 2.00.

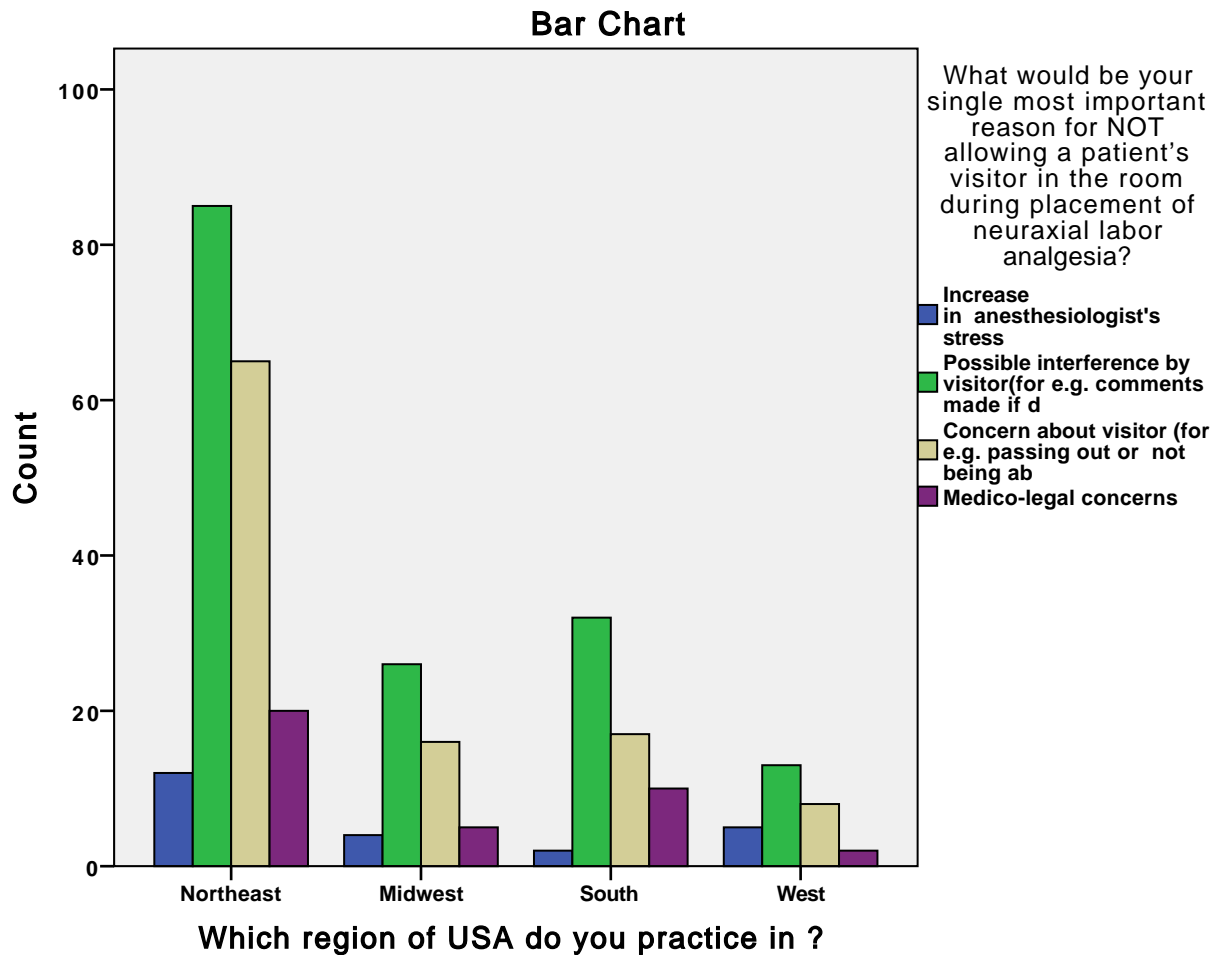

**What is the setting of your practice ? \* What is your preferred technique for neuraxial labor analgesia in an otherwise healthy parturient?**



**Crosstab**

|                                        |          |                                                 | What is your preferred technique for neuraxial labor analgesia in an otherwise healthy parturient? |                                    | Total  |
|----------------------------------------|----------|-------------------------------------------------|----------------------------------------------------------------------------------------------------|------------------------------------|--------|
|                                        |          |                                                 | Epidural analgesia                                                                                 | Combined spinal epidural analgesia |        |
| What is the setting of your practice ? | Rural    | Count                                           | 59                                                                                                 | 24                                 | 83     |
|                                        |          | % within What is the setting of your practice ? | 71.1%                                                                                              | 28.9%                              | 100.0% |
|                                        |          | Adjusted Residual                               | -1.6                                                                                               | 1.6                                |        |
|                                        | Suburban | Count                                           | 359                                                                                                | 91                                 | 450    |
|                                        |          | % within What is the setting of your practice ? | 79.8%                                                                                              | 20.2%                              | 100.0% |
|                                        |          | Adjusted Residual                               | 1.1                                                                                                | -1.1                               |        |
|                                        | Urban    | Count                                           | 597                                                                                                | 171                                | 768    |
|                                        |          | % within What is the setting of your practice ? | 77.7%                                                                                              | 22.3%                              | 100.0% |
|                                        |          | Adjusted Residual                               | -.3                                                                                                | .3                                 |        |
| Total                                  |          | Count                                           | 1015                                                                                               | 286                                | 1301   |
|                                        |          | % within What is the setting of your practice ? | 78.0%                                                                                              | 22.0%                              | 100.0% |

**Chi-Square Tests**

|                              | Value              | df | Asymp. Sig. (2-sided) |
|------------------------------|--------------------|----|-----------------------|
| Pearson Chi-Square           | 3.175 <sup>a</sup> | 2  | .204                  |
| Likelihood Ratio             | 3.042              | 2  | .219                  |
| Linear-by-Linear Association | .153               | 1  | .696                  |
| N of Valid Cases             | 1301               |    |                       |

a. 0 cells (0.0%) have expected count less than 5. The minimum expected count is 18.25.

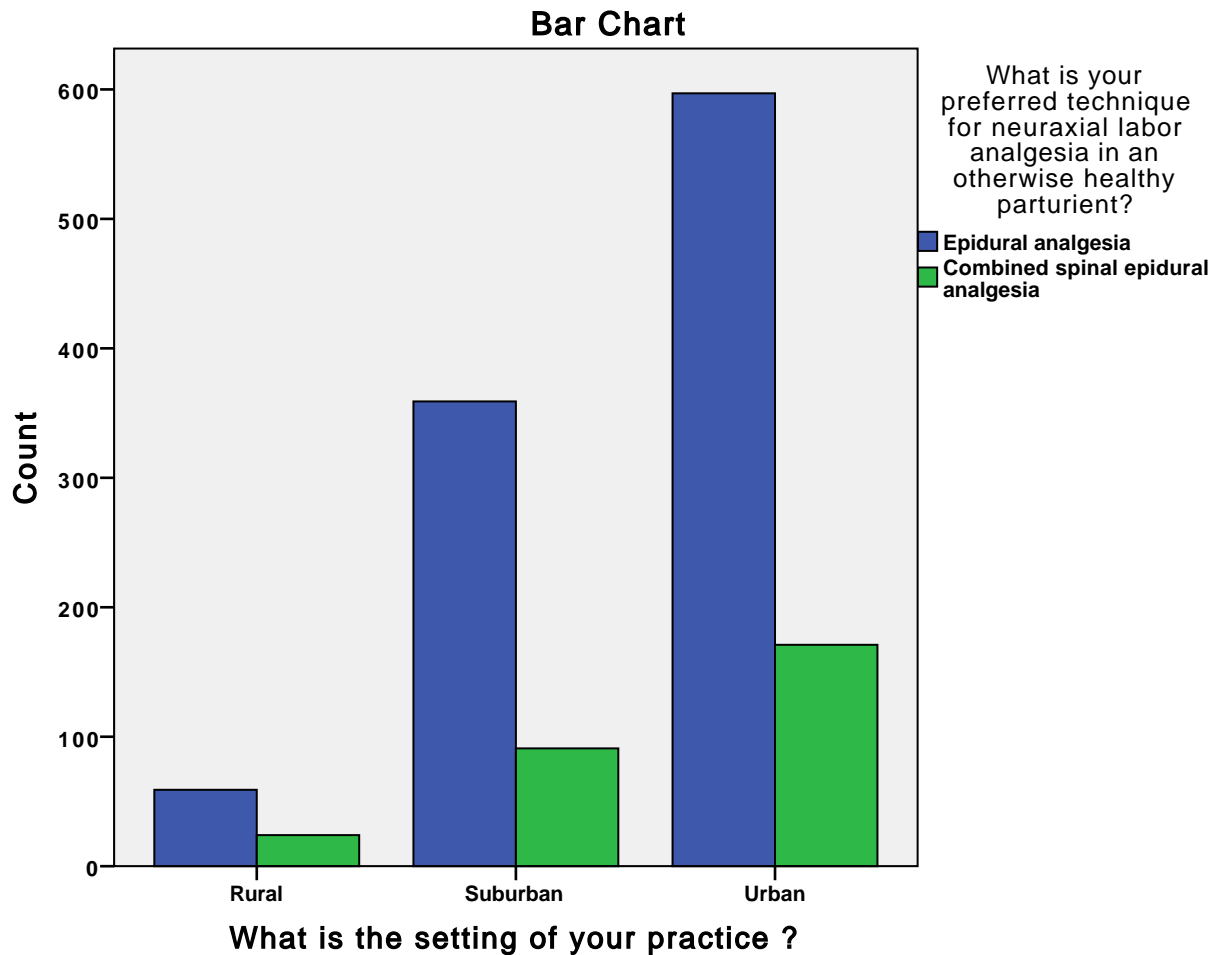

**What is the setting of your practice ? \* Does your practice or hospital have a written policy regarding allowing a patient's visitor in the room during placement of neuraxial labor analgesia?**

Crosstab

|                                        |          |                                                 | Does your practice or hospital have a written policy regarding allowing a patient's visitor in the room during placement of neuraxial labor . |                                                        |                          |
|----------------------------------------|----------|-------------------------------------------------|-----------------------------------------------------------------------------------------------------------------------------------------------|--------------------------------------------------------|--------------------------|
|                                        |          |                                                 | Yes, a written policy exists - Allows visitors                                                                                                | Yes, a written policy exists - Does not allow visitors | No written policy exists |
| What is the setting of your practice ? | Rural    | Count                                           | 14                                                                                                                                            | 3                                                      | 49                       |
|                                        |          | % within What is the setting of your practice ? | 16.9%                                                                                                                                         | 3.6%                                                   | 59.0%                    |
|                                        |          | Adjusted Residual                               | -1.3                                                                                                                                          | -1.5                                                   | 3.8                      |
|                                        | Suburban | Count                                           | 91                                                                                                                                            | 32                                                     | 193                      |
|                                        |          | % within What is the setting of your practice ? | 20.2%                                                                                                                                         | 7.1%                                                   | 42.9%                    |
|                                        |          | Adjusted Residual                               | -1.4                                                                                                                                          | -.9                                                    | 1.9                      |
|                                        | Urban    | Count                                           | 188                                                                                                                                           | 70                                                     | 271                      |
|                                        |          | % within What is the setting of your practice ? | 24.5%                                                                                                                                         | 9.1%                                                   | 35.3%                    |
|                                        |          | Adjusted Residual                               | 2.0                                                                                                                                           | 1.7                                                    | -3.7                     |
| Total                                  |          | Count                                           | 293                                                                                                                                           | 105                                                    | 513                      |
|                                        |          | % within What is the setting of your practice ? | 22.5%                                                                                                                                         | 8.1%                                                   | 39.4%                    |

**Crosstab**

|                                        |          |                                                 | Does your practice or hospital have a ... |        |
|----------------------------------------|----------|-------------------------------------------------|-------------------------------------------|--------|
|                                        |          |                                                 |                                           |        |
|                                        |          |                                                 | I do not know                             | Total  |
| What is the setting of your practice ? | Rural    | Count                                           | 17                                        | 83     |
|                                        |          | % within What is the setting of your practice ? | 20.5%                                     | 100.0% |
|                                        |          | Adjusted Residual                               | -2.0                                      |        |
|                                        | Suburban | Count                                           | 134                                       | 450    |
|                                        |          | % within What is the setting of your practice ? | 29.8%                                     | 100.0% |
|                                        |          | Adjusted Residual                               | -.1                                       |        |
|                                        | Urban    | Count                                           | 239                                       | 768    |
|                                        |          | % within What is the setting of your practice ? | 31.1%                                     | 100.0% |
|                                        |          | Adjusted Residual                               | 1.1                                       |        |
| Total                                  |          | Count                                           | 390                                       | 1301   |
|                                        |          | % within What is the setting of your practice ? | 30.0%                                     | 100.0% |

**Chi-Square Tests**

|                              | Value               | df | Asymp. Sig. (2-sided) |
|------------------------------|---------------------|----|-----------------------|
| Pearson Chi-Square           | 22.772 <sup>a</sup> | 6  | .001                  |
| Likelihood Ratio             | 22.716              | 6  | .001                  |
| Linear-by-Linear Association | 1.978               | 1  | .160                  |
| N of Valid Cases             | 1301                |    |                       |

a. 0 cells (0.0%) have expected count less than 5. The minimum expected count is 6.70.

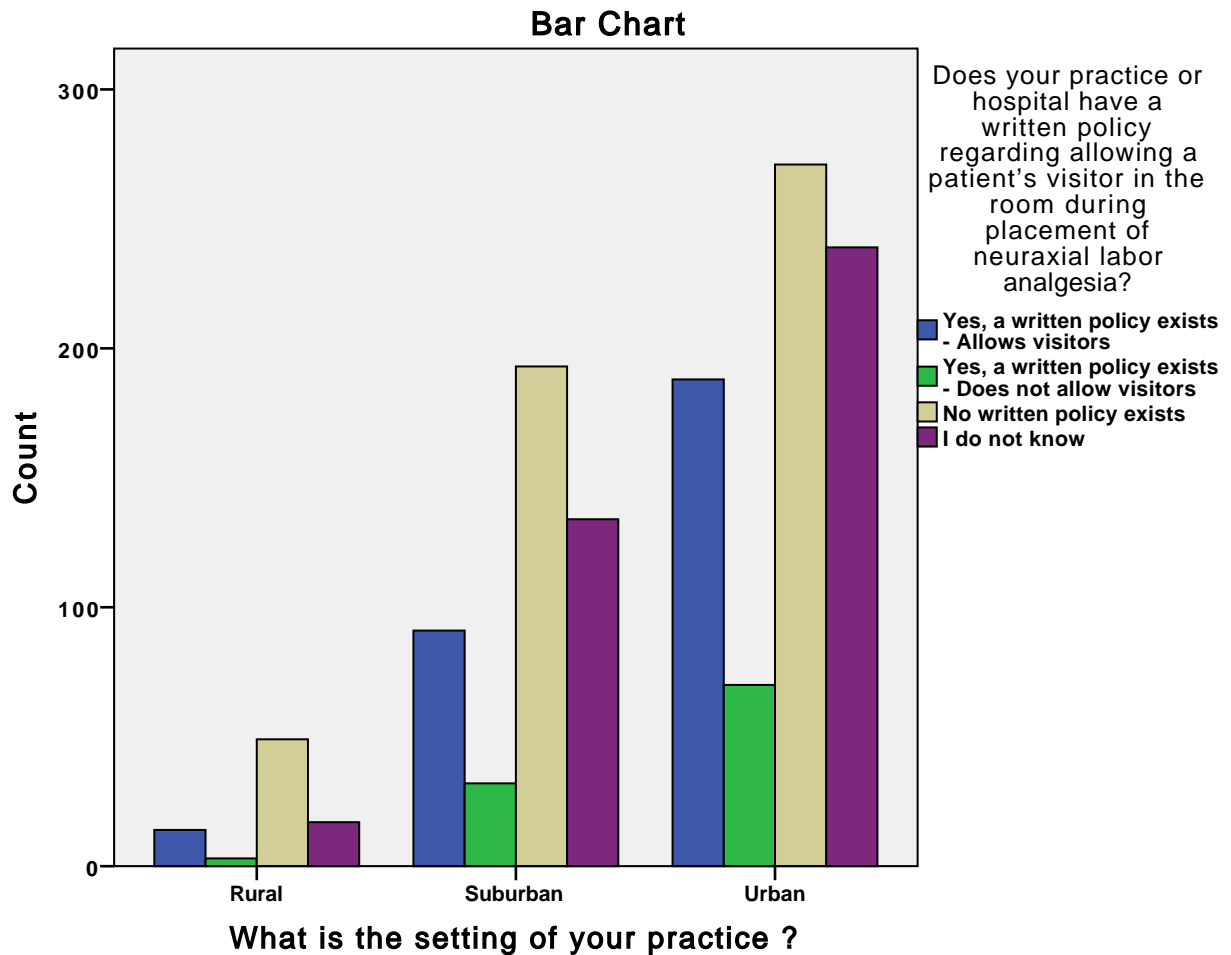

**What is the setting of your practice ? \* If no policy existed, would you be open to allowing a patient's visitor in the room during placement of neuraxial labor analgesia?**

**Crosstab**

|                                        |          |                                                 | If no policy existed, would you be open to allowing a patient's visitor in the room during placement of neuraxial labor analgesia? |       |        |
|----------------------------------------|----------|-------------------------------------------------|------------------------------------------------------------------------------------------------------------------------------------|-------|--------|
|                                        |          |                                                 | Yes                                                                                                                                | No    | Total  |
| What is the setting of your practice ? | Rural    | Count                                           | 72                                                                                                                                 | 11    | 83     |
|                                        |          | % within What is the setting of your practice ? | 86.7%                                                                                                                              | 13.3% | 100.0% |
|                                        |          | Adjusted Residual                               | 2.5                                                                                                                                | -2.5  |        |
|                                        | Suburban | Count                                           | 340                                                                                                                                | 110   | 450    |
|                                        |          | % within What is the setting of your practice ? | 75.6%                                                                                                                              | 24.4% | 100.0% |
|                                        |          | Adjusted Residual                               | .3                                                                                                                                 | -.3   |        |
|                                        | Urban    | Count                                           | 565                                                                                                                                | 203   | 768    |
|                                        |          | % within What is the setting of your practice ? | 73.6%                                                                                                                              | 26.4% | 100.0% |
|                                        |          | Adjusted Residual                               | -1.5                                                                                                                               | 1.5   |        |
| Total                                  |          | Count                                           | 977                                                                                                                                | 324   | 1301   |
|                                        |          | % within What is the setting of your practice ? | 75.1%                                                                                                                              | 24.9% | 100.0% |

**Chi-Square Tests**

|                              | Value              | df | Asymp. Sig. (2-sided) |
|------------------------------|--------------------|----|-----------------------|
| Pearson Chi-Square           | 7.034 <sup>a</sup> | 2  | .030                  |
| Likelihood Ratio             | 7.889              | 2  | .019                  |
| Linear-by-Linear Association | 4.994              | 1  | .025                  |
| N of Valid Cases             | 1301               |    |                       |

a. 0 cells (0.0%) have expected count less than 5. The minimum expected count is 20.67.

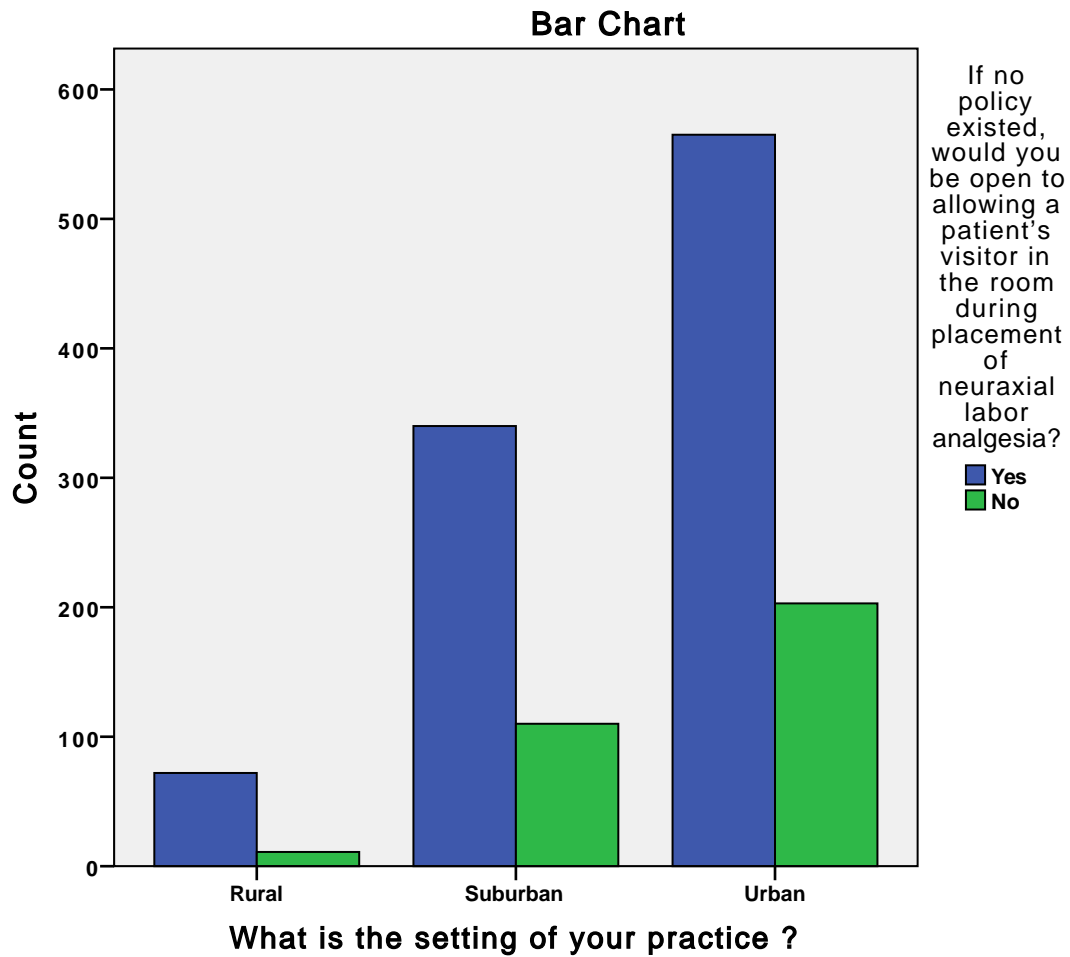

**What is the setting of your practice ? \* If you allowed a visitor in the room during placement of neuraxial labor analgesia, you would want the**

Crosstab

|                                        |          |                                                 | If you allowed a visitor in the room during placement of neuraxial labor analgesia, you would want the |                        |                 |
|----------------------------------------|----------|-------------------------------------------------|--------------------------------------------------------------------------------------------------------|------------------------|-----------------|
|                                        |          |                                                 | Visitor always standing                                                                                | Visitor always sitting | Does not matter |
| What is the setting of your practice ? | Rural    | Count                                           | 2                                                                                                      | 30                     | 40              |
|                                        |          | % within What is the setting of your practice ? | 2.8%                                                                                                   | 41.7%                  | 55.6%           |
|                                        |          | Adjusted Residual                               | 1.0                                                                                                    | -6.0                   | 5.8             |
|                                        | Suburban | Count                                           | 4                                                                                                      | 250                    | 86              |
|                                        |          | % within What is the setting of your practice ? | 1.2%                                                                                                   | 73.5%                  | 25.3%           |
|                                        |          | Adjusted Residual                               | -.5                                                                                                    | .8                     | -.6             |
|                                        | Urban    | Count                                           | 8                                                                                                      | 421                    | 132             |
|                                        |          | % within What is the setting of your practice ? | 1.4%                                                                                                   | 75.0%                  | 23.5%           |
|                                        |          | Adjusted Residual                               | .0                                                                                                     | 2.4                    | -2.5            |
| Total                                  |          | Count                                           | 14                                                                                                     | 701                    | 258             |
|                                        |          | % within What is the setting of your practice ? | 1.4%                                                                                                   | 72.0%                  | 26.5%           |



**Crosstab**

|                                        |          |                                                                               | Total         |
|----------------------------------------|----------|-------------------------------------------------------------------------------|---------------|
| What is the setting of your practice ? | Rural    | Count<br>% within What is the setting of your practice ?<br>Adjusted Residual | 72<br>100.0%  |
|                                        | Suburban | Count<br>% within What is the setting of your practice ?<br>Adjusted Residual | 340<br>100.0% |
|                                        | Urban    | Count<br>% within What is the setting of your practice ?<br>Adjusted Residual | 561<br>100.0% |
|                                        | Total    | Count<br>% within What is the setting of your practice ?                      | 973<br>100.0% |

**Chi-Square Tests**

|                              | Value               | df | Asymp. Sig. (2-sided) |
|------------------------------|---------------------|----|-----------------------|
| Pearson Chi-Square           | 36.065 <sup>a</sup> | 4  | .000                  |
| Likelihood Ratio             | 32.072              | 4  | .000                  |
| Linear-by-Linear Association | 15.973              | 1  | .000                  |
| N of Valid Cases             | 973                 |    |                       |

a. 2 cells (22.2%) have expected count less than 5. The minimum expected count is 1.04.

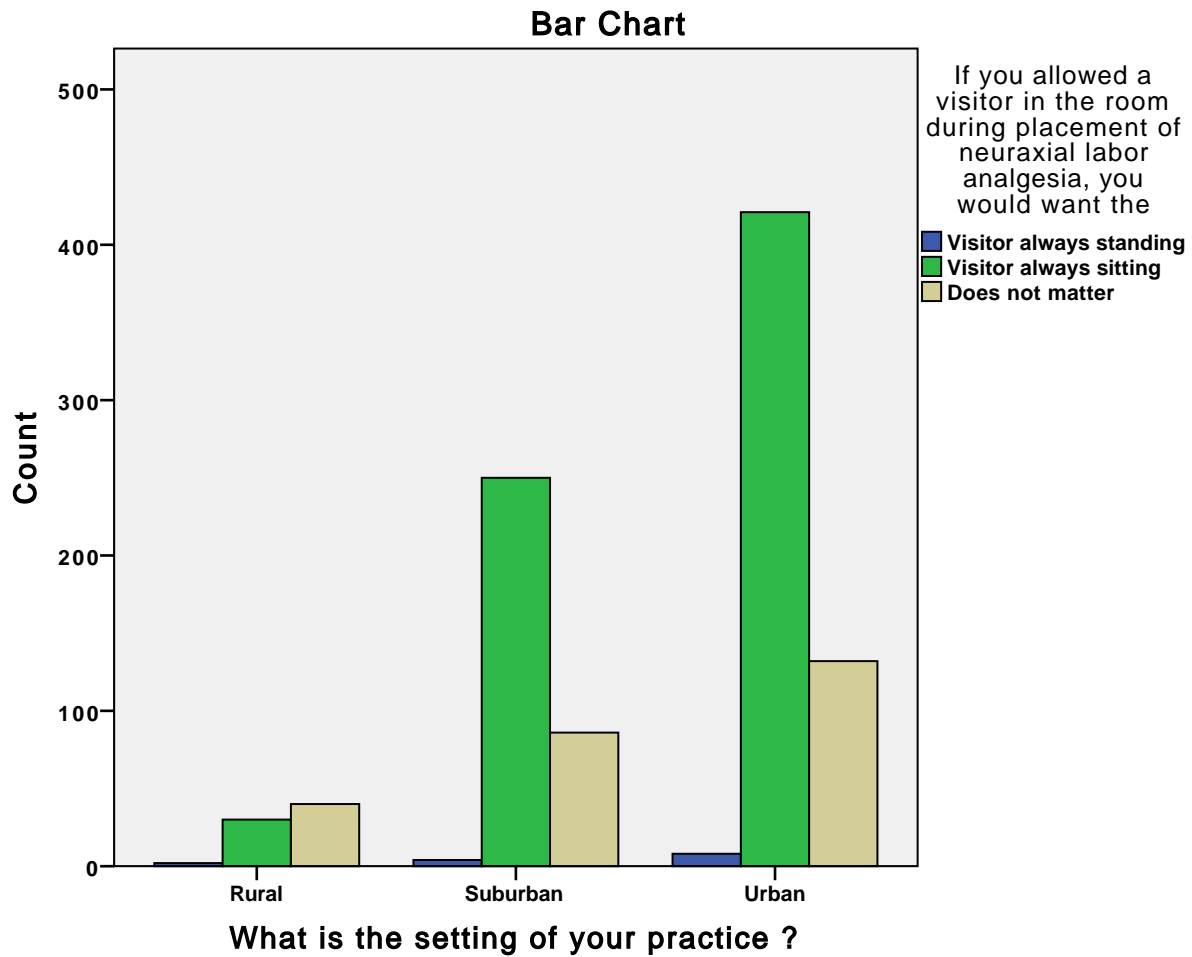

**What is the setting of your practice ? \* If you allowed a visitor in the room during placement of neuraxial labor analgesia, you would want the visitor to be positioned such that,**

Crosstab

|                                        |          |                                                 | If you allowed a visitor in the room during placement of neuraxial labor analgesia, you would want the visitor to be positioned such that, |                                                              |                 |
|----------------------------------------|----------|-------------------------------------------------|--------------------------------------------------------------------------------------------------------------------------------------------|--------------------------------------------------------------|-----------------|
|                                        |          |                                                 | Visitor has no view of procedure (patient is in between anes                                                                               | Visitor has partial view of workspace (but cannot see patien | Does not matter |
| What is the setting of your practice ? | Rural    | Count                                           | 36                                                                                                                                         | 10                                                           | 26              |
|                                        |          | % within What is the setting of your practice ? | 50.0%                                                                                                                                      | 13.9%                                                        | 36.1%           |
|                                        |          | Adjusted Residual                               | -2.0                                                                                                                                       | -1.2                                                         | 3.6             |
|                                        | Suburban | Count                                           | 213                                                                                                                                        | 69                                                           | 58              |
|                                        |          | % within What is the setting of your practice ? | 62.6%                                                                                                                                      | 20.3%                                                        | 17.1%           |
|                                        |          | Adjusted Residual                               | .7                                                                                                                                         | .7                                                           | -1.6            |
|                                        | Urban    | Count                                           | 345                                                                                                                                        | 106                                                          | 110             |
|                                        |          | % within What is the setting of your practice ? | 61.5%                                                                                                                                      | 18.9%                                                        | 19.6%           |
|                                        |          | Adjusted Residual                               | .3                                                                                                                                         | -.1                                                          | -.3             |
| Total                                  |          | Count                                           | 594                                                                                                                                        | 185                                                          | 194             |
|                                        |          | % within What is the setting of your practice ? | 61.0%                                                                                                                                      | 19.0%                                                        | 19.9%           |

**Crosstab**

|                                               |                 |                                                                                                    |                             |
|-----------------------------------------------|-----------------|----------------------------------------------------------------------------------------------------|-----------------------------|
|                                               |                 |                                                                                                    | <b>Total</b>                |
| <b>What is the setting of your practice ?</b> | <b>Rural</b>    | <b>Count</b><br><b>% within What is the setting of your practice ?</b><br><b>Adjusted Residual</b> | <b>72</b><br><b>100.0%</b>  |
|                                               | <b>Suburban</b> | <b>Count</b><br><b>% within What is the setting of your practice ?</b><br><b>Adjusted Residual</b> | <b>340</b><br><b>100.0%</b> |
|                                               | <b>Urban</b>    | <b>Count</b><br><b>% within What is the setting of your practice ?</b><br><b>Adjusted Residual</b> | <b>561</b><br><b>100.0%</b> |
|                                               | <b>Total</b>    | <b>Count</b><br><b>% within What is the setting of your practice ?</b>                             | <b>973</b><br><b>100.0%</b> |

**Chi-Square Tests**

|                                     | <b>Value</b>              | <b>df</b> | <b>Asymp. Sig. (2-sided)</b> |
|-------------------------------------|---------------------------|-----------|------------------------------|
| <b>Pearson Chi-Square</b>           | <b>13.782<sup>a</sup></b> | <b>4</b>  | <b>.008</b>                  |
| <b>Likelihood Ratio</b>             | <b>12.199</b>             | <b>4</b>  | <b>.016</b>                  |
| <b>Linear-by-Linear Association</b> | <b>2.313</b>              | <b>1</b>  | <b>.128</b>                  |
| <b>N of Valid Cases</b>             | <b>973</b>                |           |                              |

a. 0 cells (0.0%) have expected count less than 5. The minimum expected count is 13.69.

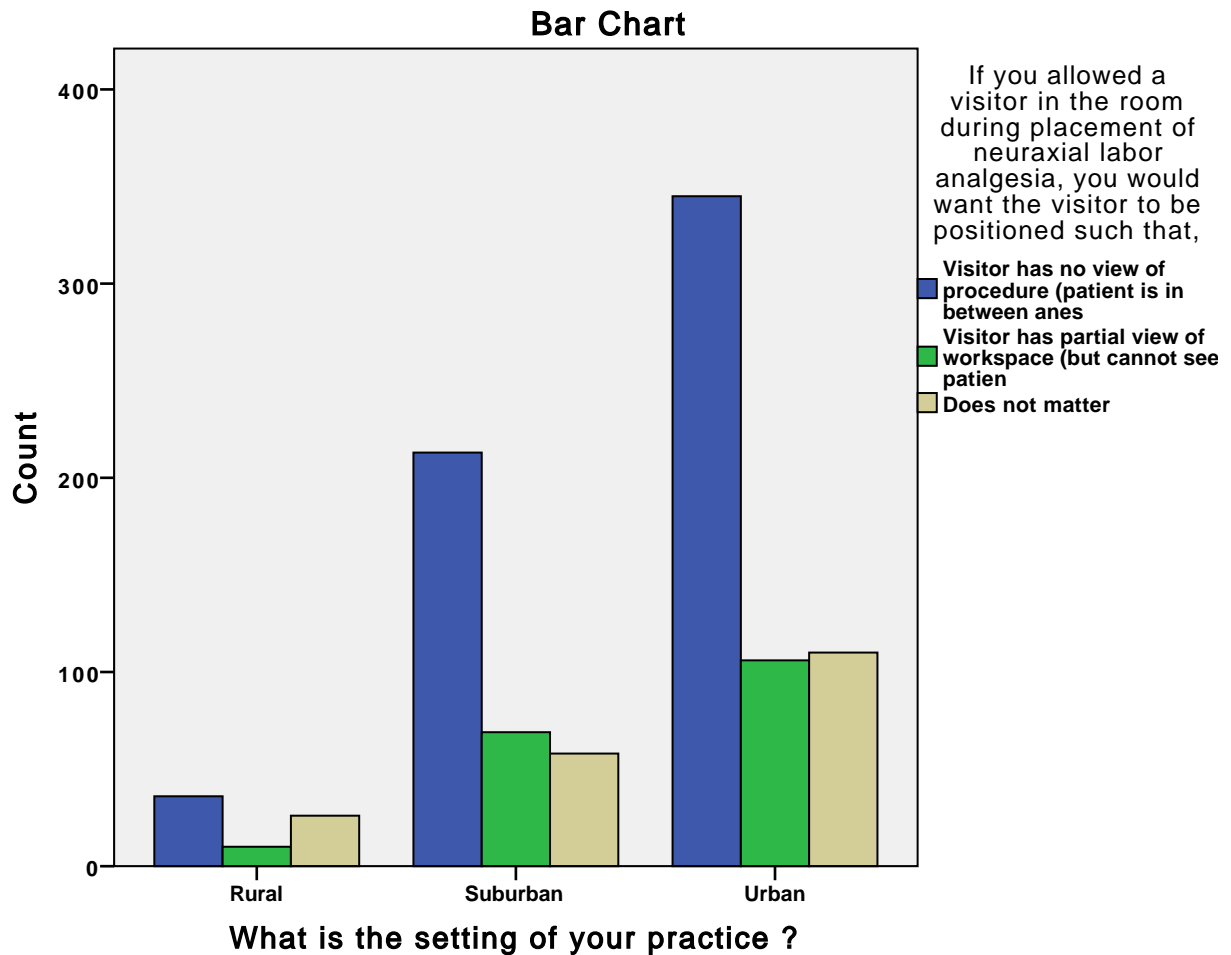

**What is the setting of your practice ? \* What would be your single most important reason for allowing a patient's visitor in the room during placement of neuraxial labor analgesia?**

Crosstab

|                                        |          |                                                 | What would be your single most important reason for allowing a patient's visitor in the room during placement of neuraxial labor ... |                                                               |                                                               |
|----------------------------------------|----------|-------------------------------------------------|--------------------------------------------------------------------------------------------------------------------------------------|---------------------------------------------------------------|---------------------------------------------------------------|
|                                        |          |                                                 | It would likely reduce patient's anxiety                                                                                             | It would likely reduce visitor's anxiety (for e. g. if visito | Visitor's assistance needed (for e. g. if visitor were a doul |
| What is the setting of your practice ? | Rural    | Count                                           | 48                                                                                                                                   | 3                                                             | 3                                                             |
|                                        |          | % within What is the setting of your practice ? | 66.7%                                                                                                                                | 4.2%                                                          | 4.2%                                                          |
|                                        |          | Adjusted Residual                               | .4                                                                                                                                   | -.4                                                           | .2                                                            |
|                                        | Suburban | Count                                           | 222                                                                                                                                  | 16                                                            | 13                                                            |
|                                        |          | % within What is the setting of your practice ? | 65.3%                                                                                                                                | 4.7%                                                          | 3.8%                                                          |
|                                        |          | Adjusted Residual                               | .3                                                                                                                                   | -.3                                                           | .0                                                            |
|                                        | Urban    | Count                                           | 359                                                                                                                                  | 30                                                            | 21                                                            |
|                                        |          | % within What is the setting of your practice ? | 64.0%                                                                                                                                | 5.3%                                                          | 3.7%                                                          |
|                                        |          | Adjusted Residual                               | -.5                                                                                                                                  | .5                                                            | -.1                                                           |
| Total                                  |          | Count                                           | 629                                                                                                                                  | 49                                                            | 37                                                            |
|                                        |          | % within What is the setting of your practice ? | 64.6%                                                                                                                                | 5.0%                                                          | 3.8%                                                          |

**Crosstab**

|                                           |          |                                                       | What would be<br>your single<br>most important ... | Total  |
|-------------------------------------------|----------|-------------------------------------------------------|----------------------------------------------------|--------|
|                                           |          |                                                       | To fulfill<br>patient's<br>request                 |        |
| What is the setting<br>of your practice ? | Rural    | Count                                                 | 18                                                 | 72     |
|                                           |          | % within What is<br>the setting of your<br>practice ? | 25.0%                                              | 100.0% |
|                                           |          | Adjusted Residual                                     | - .3                                               |        |
|                                           | Suburban | Count                                                 | 89                                                 | 340    |
|                                           |          | % within What is<br>the setting of your<br>practice ? | 26.2%                                              | 100.0% |
|                                           |          | Adjusted Residual                                     | - .2                                               |        |
|                                           | Urban    | Count                                                 | 151                                                | 561    |
|                                           |          | % within What is<br>the setting of your<br>practice ? | 26.9%                                              | 100.0% |
|                                           |          | Adjusted Residual                                     | .3                                                 |        |
| Total                                     |          | Count                                                 | 258                                                | 973    |
|                                           |          | % within What is<br>the setting of your<br>practice ? | 26.5%                                              | 100.0% |

**Chi-Square Tests**

|                              | Value             | df | Asymp. Sig. (2-sided) |
|------------------------------|-------------------|----|-----------------------|
| Pearson Chi-Square           | .536 <sup>a</sup> | 6  | .997                  |
| Likelihood Ratio             | .542              | 6  | .997                  |
| Linear-by-Linear Association | .186              | 1  | .666                  |
| N of Valid Cases             | 973               |    |                       |

a. 2 cells (16.7%) have expected count less than 5. The minimum expected count is 2.74.

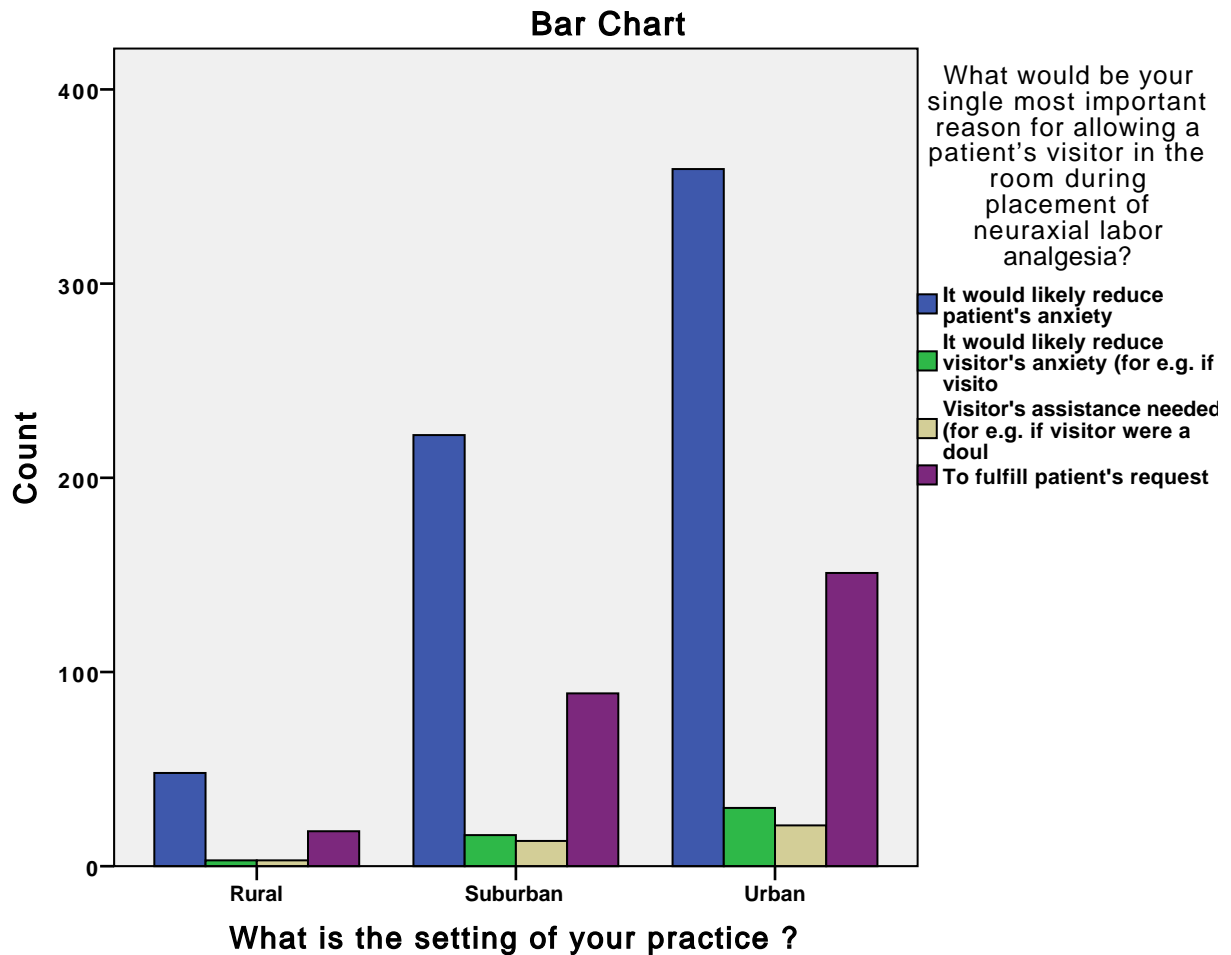

**What is the setting of your practice ? \* How often has another non anesthesia member of the labor and delivery team (for example obstetrician or nurse) attempted to influence your decision to have a visitor present during placement of neuraxial labor analgesia?**



**Crosstab**

|                                        |          |                                                 | How often has another non anesthesia member of the labor and delivery team (for example obstetrician or nurse) attempted to influence your decision to have a visitor present during placement of neuraxial labor analgesia? |                           |              |
|----------------------------------------|----------|-------------------------------------------------|------------------------------------------------------------------------------------------------------------------------------------------------------------------------------------------------------------------------------|---------------------------|--------------|
|                                        |          |                                                 | Rarely (< 5 %)                                                                                                                                                                                                               | Occasionally (5 % - 40 %) | Often > 40 % |
| What is the setting of your practice ? | Rural    | Count                                           | 50                                                                                                                                                                                                                           | 15                        | 7            |
|                                        |          | % within What is the setting of your practice ? | 69.4%                                                                                                                                                                                                                        | 20.8%                     | 9.7%         |
|                                        |          | Adjusted Residual                               | -.9                                                                                                                                                                                                                          | .6                        | .5           |
|                                        | Suburban | Count                                           | 235                                                                                                                                                                                                                          | 69                        | 36           |
|                                        |          | % within What is the setting of your practice ? | 69.1%                                                                                                                                                                                                                        | 20.3%                     | 10.6%        |
|                                        |          | Adjusted Residual                               | -2.4                                                                                                                                                                                                                         | 1.3                       | 2.0          |
|                                        | Urban    | Count                                           | 432                                                                                                                                                                                                                          | 92                        | 37           |
|                                        |          | % within What is the setting of your practice ? | 77.0%                                                                                                                                                                                                                        | 16.4%                     | 6.6%         |
|                                        |          | Adjusted Residual                               | 2.7                                                                                                                                                                                                                          | -1.6                      | -2.2         |
| Total                                  |          | Count                                           | 717                                                                                                                                                                                                                          | 176                       | 80           |
|                                        |          | % within What is the setting of your practice ? | 73.7%                                                                                                                                                                                                                        | 18.1%                     | 8.2%         |

**Crosstab**

|                                        |          |                                                 |        |
|----------------------------------------|----------|-------------------------------------------------|--------|
|                                        |          |                                                 | Total  |
| What is the setting of your practice ? | Rural    | Count                                           | 72     |
|                                        |          | % within What is the setting of your practice ? | 100.0% |
|                                        |          | Adjusted Residual                               |        |
|                                        | Suburban | Count                                           | 340    |
|                                        |          | % within What is the setting of your practice ? | 100.0% |
|                                        |          | Adjusted Residual                               |        |
|                                        | Urban    | Count                                           | 561    |
|                                        |          | % within What is the setting of your practice ? | 100.0% |
|                                        |          | Adjusted Residual                               |        |
| Total                                  |          | Count                                           | 973    |
|                                        |          | % within What is the setting of your practice ? | 100.0% |

**Chi-Square Tests**

|                                     | <b>Value</b>             | <b>df</b> | <b>Asymp. Sig. (2-sided)</b> |
|-------------------------------------|--------------------------|-----------|------------------------------|
| <b>Pearson Chi-Square</b>           | <b>8.395<sup>a</sup></b> | <b>4</b>  | <b>.078</b>                  |
| <b>Likelihood Ratio</b>             | <b>8.313</b>             | <b>4</b>  | <b>.081</b>                  |
| <b>Linear-by-Linear Association</b> | <b>6.707</b>             | <b>1</b>  | <b>.010</b>                  |
| <b>N of Valid Cases</b>             | <b>973</b>               |           |                              |

a. 0 cells (0.0%) have expected count less than 5. The minimum expected count is 5.92.

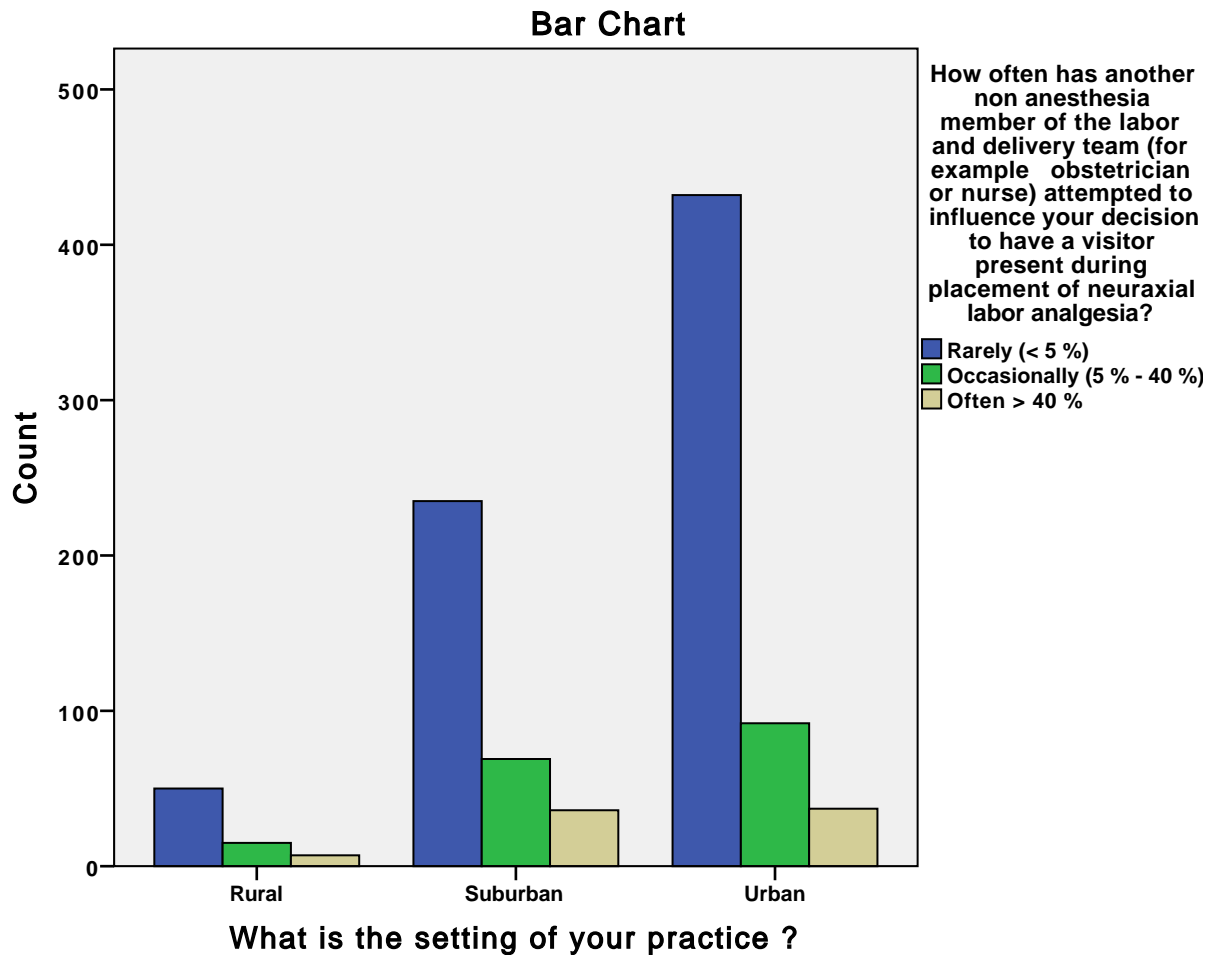

**What is the setting of your practice ? \* How often has another non anesthesia member of the labor and delivery team (for example obstetrician or nurse) attempted to influence your decision to NO T have a visitor present during placement of neuraxial labor anal gesia?**

Crosstab

|                                        |          |                                                 | How often has another non anesthesia member of the labor and delivery team (for example obstetrician or nurse) attempted to influence your decision to NOT have a visitor present during placement of neuraxial labor analgesia? |                       |              |
|----------------------------------------|----------|-------------------------------------------------|----------------------------------------------------------------------------------------------------------------------------------------------------------------------------------------------------------------------------------|-----------------------|--------------|
|                                        |          |                                                 | Rarely < 5 %                                                                                                                                                                                                                     | Occasionally 5 - 40 % | Often > 40 % |
| What is the setting of your practice ? | Rural    | Count                                           | 7                                                                                                                                                                                                                                | 3                     | 1            |
|                                        |          | % within What is the setting of your practice ? | 63.6%                                                                                                                                                                                                                            | 27.3%                 | 9.1%         |
|                                        |          | Adjusted Residual                               | -1.2                                                                                                                                                                                                                             | 1.1                   | .5           |
|                                        | Suburban | Count                                           | 85                                                                                                                                                                                                                               | 15                    | 8            |
|                                        |          | % within What is the setting of your practice ? | 78.7%                                                                                                                                                                                                                            | 13.9%                 | 7.4%         |
|                                        |          | Adjusted Residual                               | .0                                                                                                                                                                                                                               | -.7                   | 1.0          |
|                                        | Urban    | Count                                           | 161                                                                                                                                                                                                                              | 33                    | 9            |
|                                        |          | % within What is the setting of your practice ? | 79.3%                                                                                                                                                                                                                            | 16.3%                 | 4.4%         |
|                                        |          | Adjusted Residual                               | .4                                                                                                                                                                                                                               | .3                    | -1.2         |
| Total                                  |          | Count                                           | 253                                                                                                                                                                                                                              | 51                    | 18           |
|                                        |          | % within What is the setting of your practice ? | 78.6%                                                                                                                                                                                                                            | 15.8%                 | 5.6%         |

**Crosstab**

|                                        |          |                                                 |        |
|----------------------------------------|----------|-------------------------------------------------|--------|
|                                        |          |                                                 | Total  |
| What is the setting of your practice ? | Rural    | Count                                           | 11     |
|                                        |          | % within What is the setting of your practice ? | 100.0% |
|                                        |          | Adjusted Residual                               |        |
|                                        | Suburban | Count                                           | 108    |
|                                        |          | % within What is the setting of your practice ? | 100.0% |
|                                        |          | Adjusted Residual                               |        |
|                                        | Urban    | Count                                           | 203    |
|                                        |          | % within What is the setting of your practice ? | 100.0% |
|                                        |          | Adjusted Residual                               |        |
| Total                                  |          | Count                                           | 322    |
|                                        |          | % within What is the setting of your practice ? | 100.0% |

**Chi-Square Tests**

|                              | Value              | df | Asymp. Sig. (2-sided) |
|------------------------------|--------------------|----|-----------------------|
| Pearson Chi-Square           | 2.881 <sup>a</sup> | 4  | .578                  |
| Likelihood Ratio             | 2.690              | 4  | .611                  |
| Linear-by-Linear Association | 1.119              | 1  | .290                  |
| N of Valid Cases             | 322                |    |                       |

a. 2 cells (22.2%) have expected count less than 5. The minimum expected count is .61.

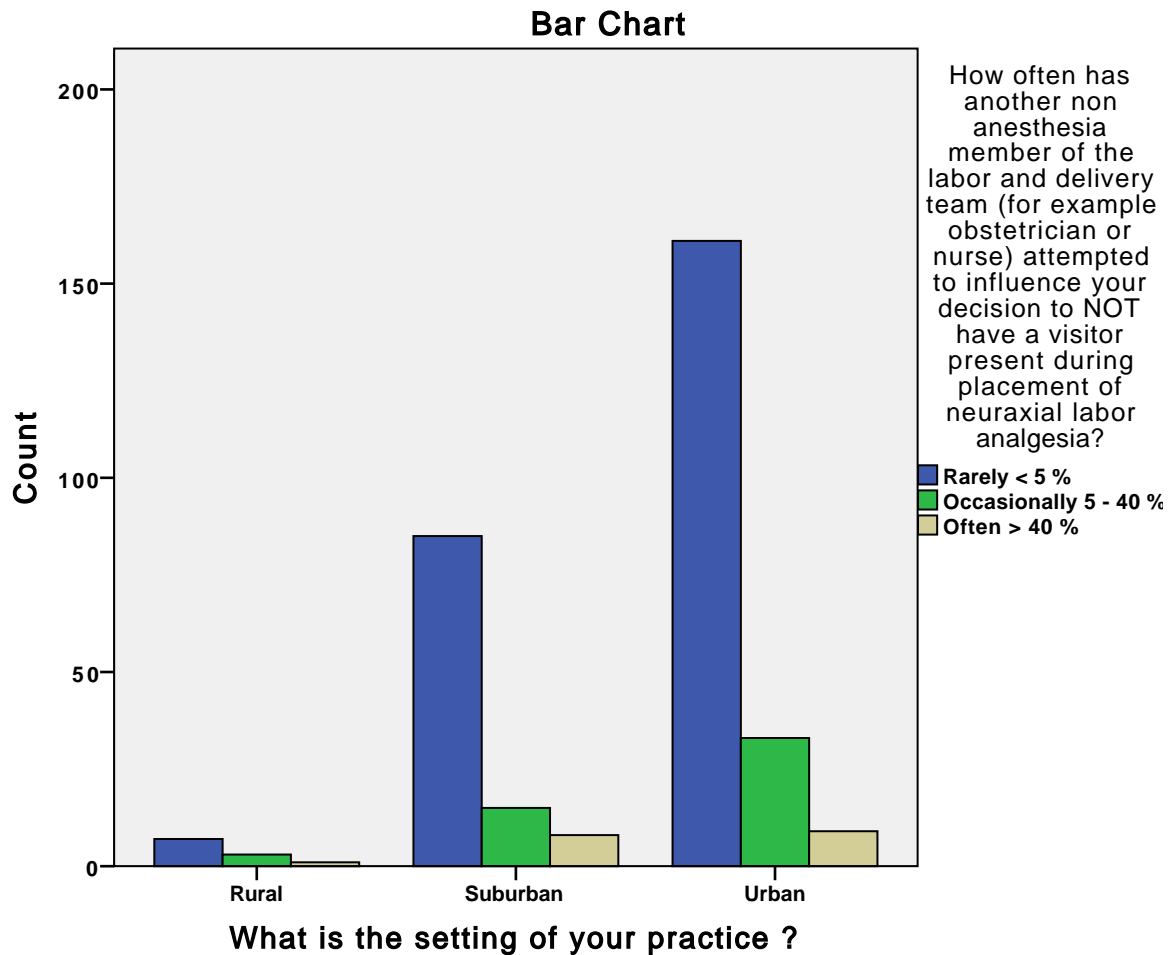

**What is the setting of your practice ? \* What would be your single most important reason for NOT allowing a patient's visitor in the room during placement of neuraxial labor analgesia?**

Crosstab

|                                        |          |                                                 | What would be your single most important reason for NOT allowing a patient's visitor in the room during placement of neuraxial labor . |                                                              |                                                             |
|----------------------------------------|----------|-------------------------------------------------|----------------------------------------------------------------------------------------------------------------------------------------|--------------------------------------------------------------|-------------------------------------------------------------|
|                                        |          |                                                 | Increase in anesthesiologist's stress                                                                                                  | Possible interference by visitor(for e.g. comments made if d | Concern about visitor (for e.g. passing out or not being ab |
| What is the setting of your practice ? | Rural    | Count                                           | 3                                                                                                                                      | 3                                                            | 2                                                           |
|                                        |          | % within What is the setting of your practice ? | 27.3%                                                                                                                                  | 27.3%                                                        | 18.2%                                                       |
|                                        |          | Adjusted Residual                               | 2.6                                                                                                                                    | -1.4                                                         | -1.1                                                        |
|                                        | Suburban | Count                                           | 8                                                                                                                                      | 56                                                           | 32                                                          |
|                                        |          | % within What is the setting of your practice ? | 7.4%                                                                                                                                   | 51.9%                                                        | 29.6%                                                       |
|                                        |          | Adjusted Residual                               | .1                                                                                                                                     | .9                                                           | -.9                                                         |
|                                        | Urban    | Count                                           | 12                                                                                                                                     | 97                                                           | 72                                                          |
|                                        |          | % within What is the setting of your practice ? | 5.9%                                                                                                                                   | 47.8%                                                        | 35.5%                                                       |
|                                        |          | Adjusted Residual                               | -1.1                                                                                                                                   | -.3                                                          | 1.3                                                         |
| Total                                  |          | Count                                           | 23                                                                                                                                     | 156                                                          | 106                                                         |
|                                        |          | % within What is the setting of your practice ? | 7.1%                                                                                                                                   | 48.4%                                                        | 32.9%                                                       |

**Crosstab**

|                                           |          |                                                       | What would be<br>your single<br>most important ... |        |
|-------------------------------------------|----------|-------------------------------------------------------|----------------------------------------------------|--------|
|                                           |          |                                                       | Medico-legal<br>concerns                           | Total  |
| What is the setting<br>of your practice ? | Rural    | Count                                                 | 3                                                  | 11     |
|                                           |          | % within What is<br>the setting of your<br>practice ? | 27.3%                                              | 100.0% |
|                                           |          | Adjusted Residual                                     | 1.7                                                |        |
|                                           | Suburban | Count                                                 | 12                                                 | 108    |
|                                           |          | % within What is<br>the setting of your<br>practice ? | 11.1%                                              | 100.0% |
|                                           |          | Adjusted Residual                                     | -.2                                                |        |
|                                           | Urban    | Count                                                 | 22                                                 | 203    |
|                                           |          | % within What is<br>the setting of your<br>practice ? | 10.8%                                              | 100.0% |
|                                           |          | Adjusted Residual                                     | -.5                                                |        |
| Total                                     |          | Count                                                 | 37                                                 | 322    |
|                                           |          | % within What is<br>the setting of your<br>practice ? | 11.5%                                              | 100.0% |

**Chi-Square Tests**

|                                 | Value               | df | Asymp. Sig.<br>(2-sided) |
|---------------------------------|---------------------|----|--------------------------|
| Pearson Chi-Square              | 11.931 <sup>a</sup> | 6  | .064                     |
| Likelihood Ratio                | 8.991               | 6  | .174                     |
| Linear-by-Linear<br>Association | .467                | 1  | .495                     |
| N of Valid Cases                | 322                 |    |                          |

a. 3 cells (25.0%) have expected count less than 5. The minimum expected count is .79.



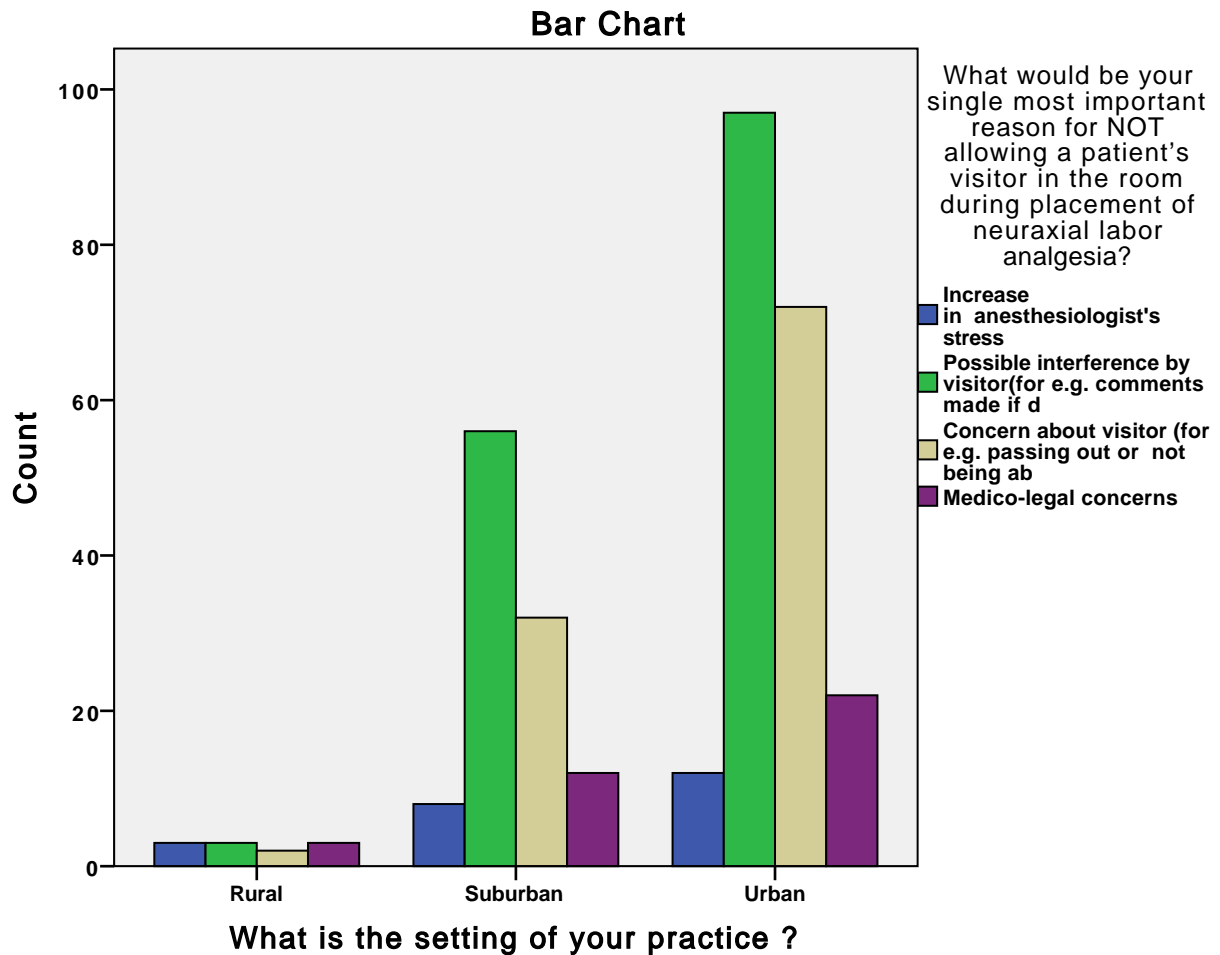

**Describe the nature of your practice ? \* What is your preferred technique for neuraxial labor analgesia in an otherwise healthy parturient?**

**Crosstab**

|                                        |            |                                                 | What is your preferred technique for neuraxial labor analgesia in an otherwise healthy parturient? |                                    |        |
|----------------------------------------|------------|-------------------------------------------------|----------------------------------------------------------------------------------------------------|------------------------------------|--------|
|                                        |            |                                                 | Epidural analgesia                                                                                 | Combined spinal epidural analgesia |        |
| Describe the nature of your practice ? | Academic   | Count                                           | 420                                                                                                | 161                                | 581    |
|                                        |            | % within Describe the nature of your practice ? | 72.3%                                                                                              | 27.7%                              | 100.0% |
|                                        |            | Adjusted Residual                               | -4.5                                                                                               | 4.5                                |        |
|                                        | Private    | Count                                           | 561                                                                                                | 121                                | 682    |
|                                        |            | % within Describe the nature of your practice ? | 82.3%                                                                                              | 17.7%                              | 100.0% |
|                                        |            | Adjusted Residual                               | 3.9                                                                                                | -3.9                               |        |
|                                        | Government | Count                                           | 34                                                                                                 | 4                                  | 38     |
|                                        |            | % within Describe the nature of your practice ? | 89.5%                                                                                              | 10.5%                              | 100.0% |
|                                        |            | Adjusted Residual                               | 1.7                                                                                                | -1.7                               |        |
| Total                                  |            | Count                                           | 1015                                                                                               | 286                                | 1301   |
|                                        |            | % within Describe the nature of your practice ? | 78.0%                                                                                              | 22.0%                              | 100.0% |

**Chi-Square Tests**

|                              | Value               | df | Asymp. Sig. (2-sided) |
|------------------------------|---------------------|----|-----------------------|
| Pearson Chi-Square           | 21.175 <sup>a</sup> | 2  | .000                  |
| Likelihood Ratio             | 21.457              | 2  | .000                  |
| Linear-by-Linear Association | 21.028              | 1  | .000                  |
| N of Valid Cases             | 1301                |    |                       |

a. 0 cells (0.0%) have expected count less than 5. The minimum expected count is 8.35.

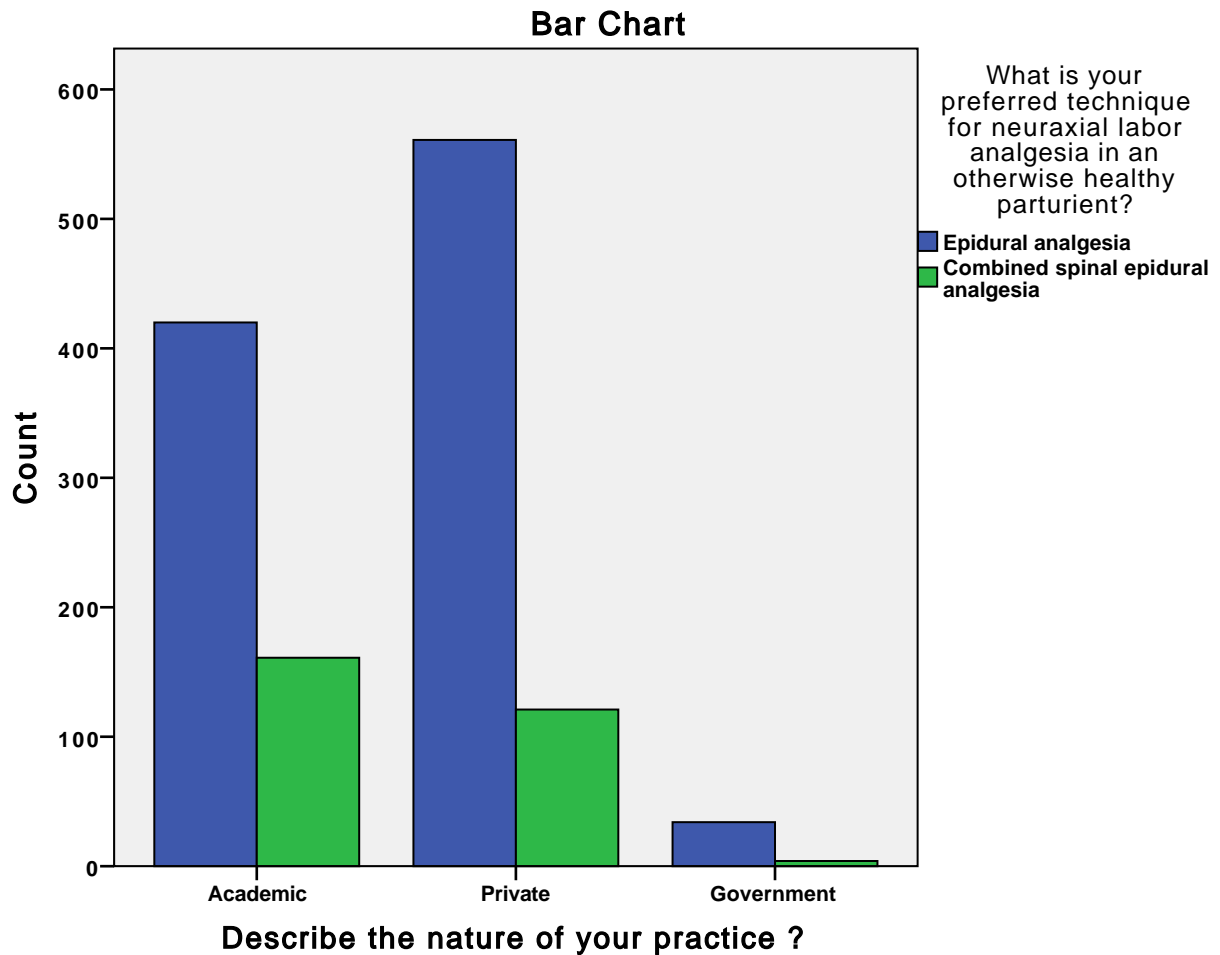

**Describe the nature of your practice ? \* Does your practice or hospital have a written policy regarding allowing a patient's visitor in the room during placement of neuraxial labor analgesia?**

**Crosstab**

|                                        |            |                                                 | Does your practice or hospital have a written policy regarding allowing a patient's visitor in the room during placement of neuraxial labor |                                                        |                          |
|----------------------------------------|------------|-------------------------------------------------|---------------------------------------------------------------------------------------------------------------------------------------------|--------------------------------------------------------|--------------------------|
|                                        |            |                                                 | Yes, a written policy exists - Allows visitors                                                                                              | Yes, a written policy exists - Does not allow visitors | No written policy exists |
| Describe the nature of your practice ? | Academic   | Count                                           | 144                                                                                                                                         | 49                                                     | 184                      |
|                                        |            | % within Describe the nature of your practice ? | 24.8%                                                                                                                                       | 8.4%                                                   | 31.7%                    |
|                                        |            | Adjusted Residual                               | 1.8                                                                                                                                         | .4                                                     | -5.1                     |
|                                        | Private    | Count                                           | 144                                                                                                                                         | 55                                                     | 308                      |
|                                        |            | % within Describe the nature of your practice ? | 21.1%                                                                                                                                       | 8.1%                                                   | 45.2%                    |
|                                        |            | Adjusted Residual                               | -1.3                                                                                                                                        | .0                                                     | 4.4                      |
|                                        | Government | Count                                           | 5                                                                                                                                           | 1                                                      | 21                       |
|                                        |            | % within Describe the nature of your practice ? | 13.2%                                                                                                                                       | 2.6%                                                   | 55.3%                    |
|                                        |            | Adjusted Residual                               | -1.4                                                                                                                                        | -1.2                                                   | 2.0                      |
| Total                                  |            | Count                                           | 293                                                                                                                                         | 105                                                    | 513                      |
|                                        |            | % within Describe the nature of your practice ? | 22.5%                                                                                                                                       | 8.1%                                                   | 39.4%                    |

**Crosstab**

|                                        |            |                                                 | Does your practice or hospital have a ... |        |
|----------------------------------------|------------|-------------------------------------------------|-------------------------------------------|--------|
|                                        |            |                                                 |                                           |        |
|                                        |            |                                                 | I do not know                             | Total  |
| Describe the nature of your practice ? | Academic   | Count                                           | 204                                       | 581    |
|                                        |            | % within Describe the nature of your practice ? | 35.1%                                     | 100.0% |
|                                        |            | Adjusted Residual                               | 3.6                                       |        |
|                                        | Private    | Count                                           | 175                                       | 682    |
|                                        |            | % within Describe the nature of your practice ? | 25.7%                                     | 100.0% |
|                                        |            | Adjusted Residual                               | -3.6                                      |        |
|                                        | Government | Count                                           | 11                                        | 38     |
|                                        |            | % within Describe the nature of your practice ? | 28.9%                                     | 100.0% |
|                                        |            | Adjusted Residual                               | -.1                                       |        |
| Total                                  |            | Count                                           | 390                                       | 1301   |
|                                        |            | % within Describe the nature of your practice ? | 30.0%                                     | 100.0% |

**Chi-Square Tests**

|                              | Value               | df | Asymp. Sig. (2-sided) |
|------------------------------|---------------------|----|-----------------------|
| Pearson Chi-Square           | 31.224 <sup>a</sup> | 6  | .000                  |
| Likelihood Ratio             | 32.026              | 6  | .000                  |
| Linear-by-Linear Association | .113                | 1  | .737                  |
| N of Valid Cases             | 1301                |    |                       |

a. 1 cells (8.3%) have expected count less than 5. The minimum expected count is 3.07.

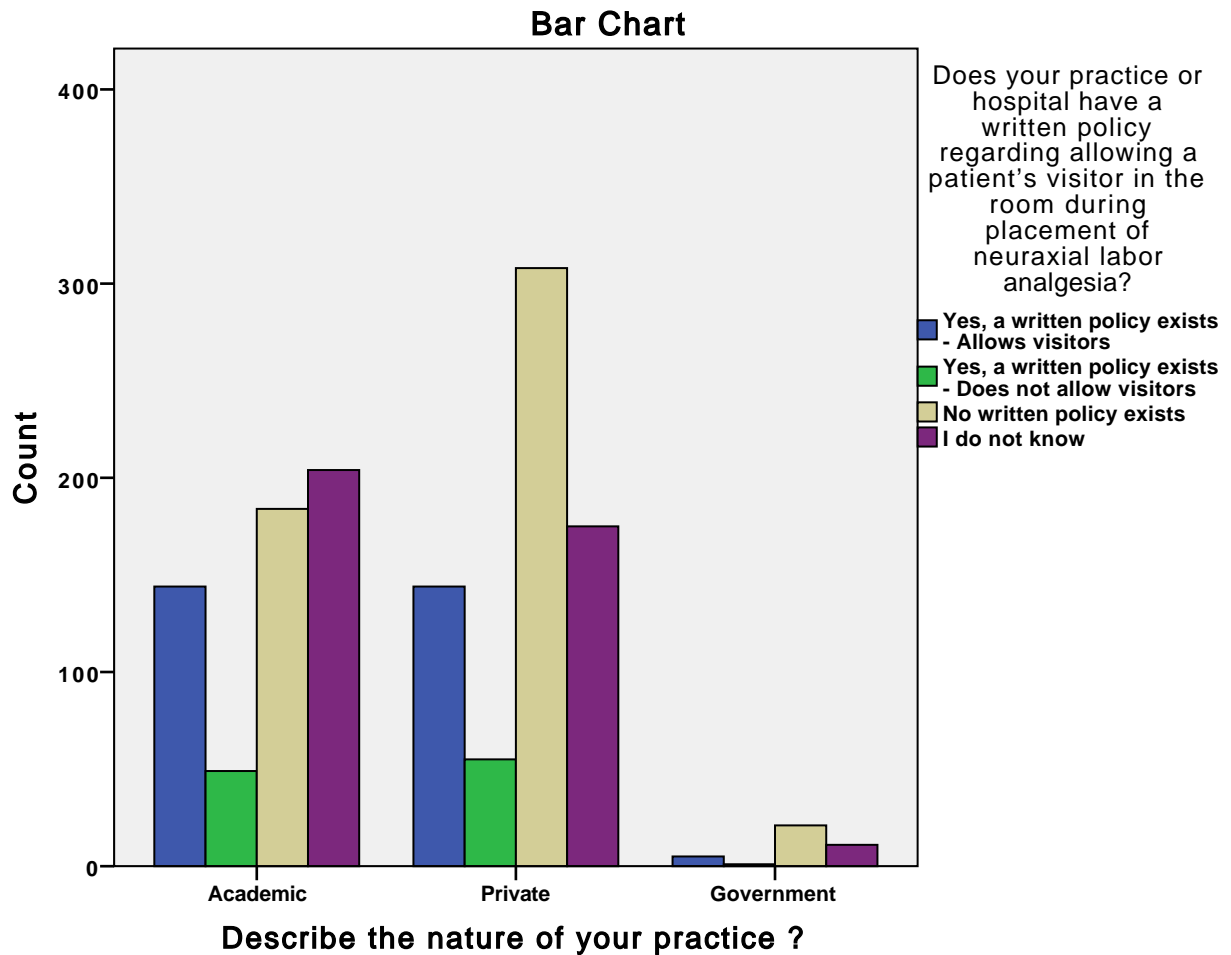

**Describe the nature of your practice ? \* If no policy existed, would you be open to allowing a patient's visitor in the room during placement of neuraxial labor analgesia?**

**Crosstab**

|                                        |            |                                                 | If no policy existed, would you be open to allowing a patient's visitor in the room during placement of neuraxial labor analgesia? |       | Total  |
|----------------------------------------|------------|-------------------------------------------------|------------------------------------------------------------------------------------------------------------------------------------|-------|--------|
|                                        |            |                                                 | Yes                                                                                                                                | No    |        |
| Describe the nature of your practice ? | Academic   | Count                                           | 422                                                                                                                                | 159   | 581    |
|                                        |            | % within Describe the nature of your practice ? | 72.6%                                                                                                                              | 27.4% | 100.0% |
|                                        |            | Adjusted Residual                               | -1.8                                                                                                                               | 1.8   |        |
|                                        | Private    | Count                                           | 528                                                                                                                                | 154   | 682    |
|                                        |            | % within Describe the nature of your practice ? | 77.4%                                                                                                                              | 22.6% | 100.0% |
|                                        |            | Adjusted Residual                               | 2.0                                                                                                                                | -2.0  |        |
|                                        | Government | Count                                           | 27                                                                                                                                 | 11    | 38     |
|                                        |            | % within Describe the nature of your practice ? | 71.1%                                                                                                                              | 28.9% | 100.0% |
|                                        |            | Adjusted Residual                               | -.6                                                                                                                                | .6    |        |
| Total                                  |            | Count                                           | 977                                                                                                                                | 324   | 1301   |
|                                        |            | % within Describe the nature of your practice ? | 75.1%                                                                                                                              | 24.9% | 100.0% |

**Chi-Square Tests**

|                              | Value              | df | Asymp. Sig. (2-sided) |
|------------------------------|--------------------|----|-----------------------|
| Pearson Chi-Square           | 4.185 <sup>a</sup> | 2  | .123                  |
| Likelihood Ratio             | 4.178              | 2  | .124                  |
| Linear-by-Linear Association | 2.221              | 1  | .136                  |
| N of Valid Cases             | 1301               |    |                       |

a. 0 cells (0.0%) have expected count less than 5. The minimum expected count is 9.46.

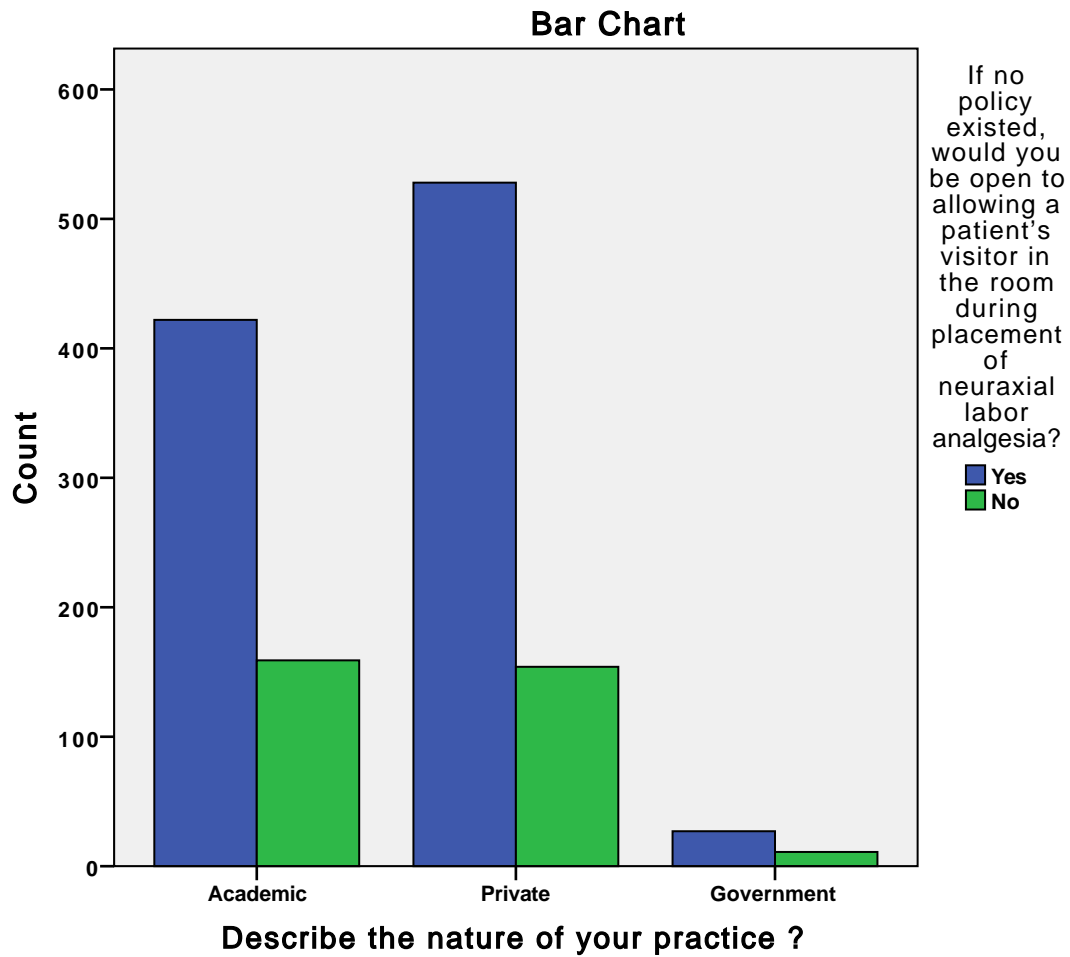

**Describe the nature of your practice ? \* If you allowed a visitor in the room during placement of neuraxial labor analgesia, you would want the**



**Crosstab**

|                                        |            |                                                 | If you allowed a visitor in the room during placement of neuraxial labor analgesia, you would want the |                        |                 |
|----------------------------------------|------------|-------------------------------------------------|--------------------------------------------------------------------------------------------------------|------------------------|-----------------|
|                                        |            |                                                 | Visitor always standing                                                                                | Visitor always sitting | Does not matter |
| Describe the nature of your practice ? | Academic   | Count                                           | 5                                                                                                      | 317                    | 97              |
|                                        |            | % within Describe the nature of your practice ? | 1.2%                                                                                                   | 75.7%                  | 23.2%           |
|                                        |            | Adjusted Residual                               | - .6                                                                                                   | 2.2                    | -2.1            |
|                                        | Private    | Count                                           | 5                                                                                                      | 371                    | 150             |
|                                        |            | % within Describe the nature of your practice ? | 1.0%                                                                                                   | 70.5%                  | 28.5%           |
|                                        |            | Adjusted Residual                               | -1.4                                                                                                   | -1.1                   | 1.5             |
|                                        | Government | Count                                           | 4                                                                                                      | 13                     | 11              |
|                                        |            | % within Describe the nature of your practice ? | 14.3%                                                                                                  | 46.4%                  | 39.3%           |
|                                        |            | Adjusted Residual                               | 5.8                                                                                                    | -3.1                   | 1.6             |
| Total                                  |            | Count                                           | 14                                                                                                     | 701                    | 258             |
|                                        |            | % within Describe the nature of your practice ? | 1.4%                                                                                                   | 72.0%                  | 26.5%           |

**Crosstab**

|                                        |            |                                                                               | Total         |
|----------------------------------------|------------|-------------------------------------------------------------------------------|---------------|
| Describe the nature of your practice ? | Academic   | Count<br>% within Describe the nature of your practice ?<br>Adjusted Residual | 419<br>100.0% |
|                                        | Private    | Count<br>% within Describe the nature of your practice ?<br>Adjusted Residual | 526<br>100.0% |
|                                        | Government | Count<br>% within Describe the nature of your practice ?<br>Adjusted Residual | 28<br>100.0%  |
| Total                                  |            | Count<br>% within Describe the nature of your practice ?                      | 973<br>100.0% |

**Chi-Square Tests**

|                              | Value               | df | Asymp. Sig. (2-sided) |
|------------------------------|---------------------|----|-----------------------|
| Pearson Chi-Square           | 40.946 <sup>a</sup> | 4  | .000                  |
| Likelihood Ratio             | 20.326              | 4  | .000                  |
| Linear-by-Linear Association | 2.709               | 1  | .100                  |
| N of Valid Cases             | 973                 |    |                       |

a. 1 cells (11.1%) have expected count less than 5. The minimum expected count is .40.

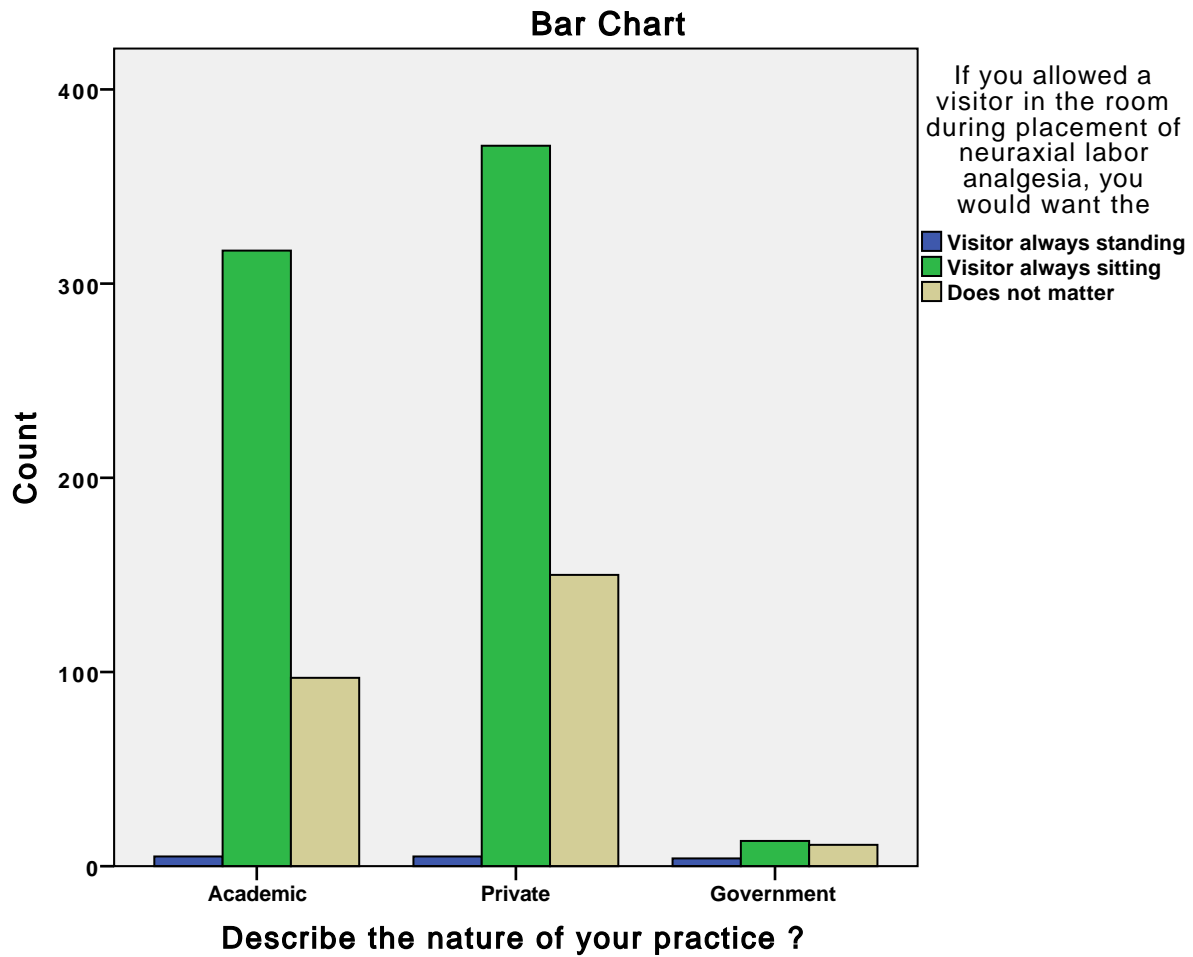

**Describe the nature of your practice ? \* If you allowed a visitor in the room during placement of neuraxial labor analgesia, you would want the visitor to be positioned such that,**

Crosstab

|                                        |            |                                                 | If you allowed a visitor in the room during placement of neuraxial labor analgesia, you would want the visitor to be positioned such that, |                                                              |                 |
|----------------------------------------|------------|-------------------------------------------------|--------------------------------------------------------------------------------------------------------------------------------------------|--------------------------------------------------------------|-----------------|
|                                        |            |                                                 | Visitor has no view of procedure (patient is in between anes                                                                               | Visitor has partial view of workspace (but cannot see patien | Does not matter |
| Describe the nature of your practice ? | Academic   | Count                                           | 275                                                                                                                                        | 79                                                           | 65              |
|                                        |            | % within Describe the nature of your practice ? | 65.6%                                                                                                                                      | 18.9%                                                        | 15.5%           |
|                                        |            | Adjusted Residual                               | 2.6                                                                                                                                        | - .1                                                         | -3.0            |
|                                        | Private    | Count                                           | 305                                                                                                                                        | 101                                                          | 120             |
|                                        |            | % within Describe the nature of your practice ? | 58.0%                                                                                                                                      | 19.2%                                                        | 22.8%           |
|                                        |            | Adjusted Residual                               | -2.1                                                                                                                                       | .2                                                           | 2.4             |
|                                        | Government | Count                                           | 14                                                                                                                                         | 5                                                            | 9               |
|                                        |            | % within Describe the nature of your practice ? | 50.0%                                                                                                                                      | 17.9%                                                        | 32.1%           |
|                                        |            | Adjusted Residual                               | -1.2                                                                                                                                       | - .2                                                         | 1.6             |
| Total                                  |            | Count                                           | 594                                                                                                                                        | 185                                                          | 194             |
|                                        |            | % within Describe the nature of your practice ? | 61.0%                                                                                                                                      | 19.0%                                                        | 19.9%           |

**Crosstab**

|                                               |                   |                                                        |               |
|-----------------------------------------------|-------------------|--------------------------------------------------------|---------------|
|                                               |                   |                                                        | <b>Total</b>  |
| <b>Describe the nature of your practice ?</b> | <b>Academic</b>   | <b>Count</b>                                           | <b>419</b>    |
|                                               |                   | <b>% within Describe the nature of your practice ?</b> | <b>100.0%</b> |
|                                               |                   | <b>Adjusted Residual</b>                               |               |
|                                               | <b>Private</b>    | <b>Count</b>                                           | <b>526</b>    |
|                                               |                   | <b>% within Describe the nature of your practice ?</b> | <b>100.0%</b> |
|                                               |                   | <b>Adjusted Residual</b>                               |               |
|                                               | <b>Government</b> | <b>Count</b>                                           | <b>28</b>     |
|                                               |                   | <b>% within Describe the nature of your practice ?</b> | <b>100.0%</b> |
|                                               |                   | <b>Adjusted Residual</b>                               |               |
| <b>Total</b>                                  |                   | <b>Count</b>                                           | <b>973</b>    |
|                                               |                   | <b>% within Describe the nature of your practice ?</b> | <b>100.0%</b> |

**Chi-Square Tests**

|                                     | <b>Value</b>        | <b>df</b> | <b>Asymp. Sig. (2-sided)</b> |
|-------------------------------------|---------------------|-----------|------------------------------|
| <b>Pearson Chi-Square</b>           | 11.234 <sup>a</sup> | 4         | .024                         |
| <b>Likelihood Ratio</b>             | 11.166              | 4         | .025                         |
| <b>Linear-by-Linear Association</b> | 10.534              | 1         | .001                         |
| <b>N of Valid Cases</b>             | 973                 |           |                              |

a. 0 cells (0.0%) have expected count less than 5. The minimum expected count is 5.32.

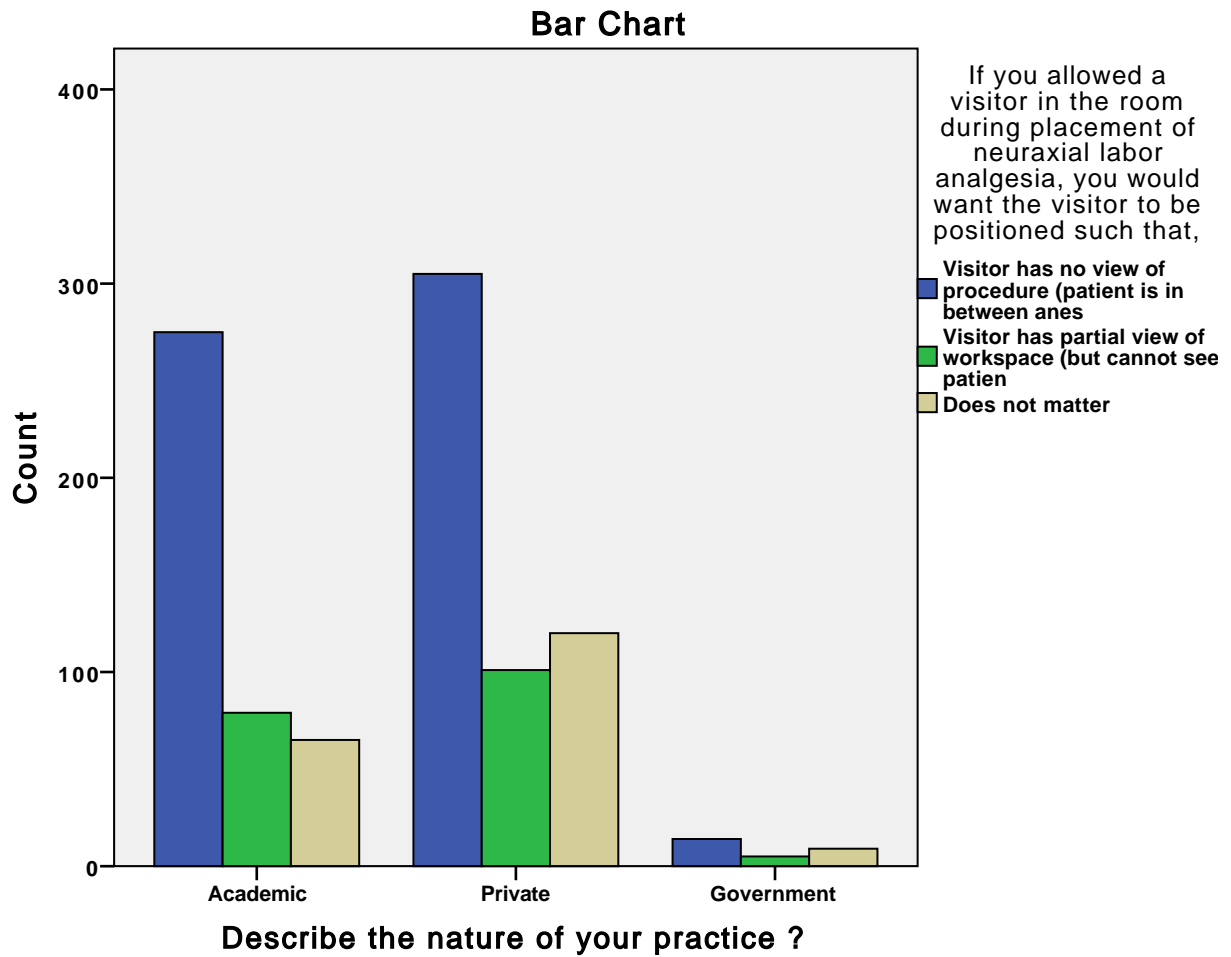

**Describe the nature of your practice ? \* What would be your single most important reason for allowing a patient's visitor in the room during placement of neuraxial labor analgesia?**

Crosstab

|                                        |            |                                                 | What would be your single most important reason for allowing a patient's visitor in the room during placement of neuraxial labor ... |                                                               |                                                               |
|----------------------------------------|------------|-------------------------------------------------|--------------------------------------------------------------------------------------------------------------------------------------|---------------------------------------------------------------|---------------------------------------------------------------|
|                                        |            |                                                 | It would likely reduce patient's anxiety                                                                                             | It would likely reduce visitor's anxiety (for e. g. if visito | Visitor's assistance needed (for e. g. if visitor were a doul |
| Describe the nature of your practice ? | Academic   | Count                                           | 263                                                                                                                                  | 18                                                            | 17                                                            |
|                                        |            | % within Describe the nature of your practice ? | 62.8%                                                                                                                                | 4.3%                                                          | 4.1%                                                          |
|                                        |            | Adjusted Residual                               | -1.1                                                                                                                                 | -.9                                                           | .4                                                            |
|                                        | Private    | Count                                           | 343                                                                                                                                  | 31                                                            | 19                                                            |
|                                        |            | % within Describe the nature of your practice ? | 65.2%                                                                                                                                | 5.9%                                                          | 3.6%                                                          |
|                                        |            | Adjusted Residual                               | .4                                                                                                                                   | 1.3                                                           | -.3                                                           |
|                                        | Government | Count                                           | 23                                                                                                                                   | 0                                                             | 1                                                             |
|                                        |            | % within Describe the nature of your practice ? | 82.1%                                                                                                                                | 0.0%                                                          | 3.6%                                                          |
|                                        |            | Adjusted Residual                               | 2.0                                                                                                                                  | -1.2                                                          | -.1                                                           |
| Total                                  |            | Count                                           | 629                                                                                                                                  | 49                                                            | 37                                                            |
|                                        |            | % within Describe the nature of your practice ? | 64.6%                                                                                                                                | 5.0%                                                          | 3.8%                                                          |

**Crosstab**

|                                        |            |                                                 | What would be your single most important ... | Total  |
|----------------------------------------|------------|-------------------------------------------------|----------------------------------------------|--------|
|                                        |            |                                                 | To fulfill patient's request                 |        |
| Describe the nature of your practice ? | Academic   | Count                                           | 121                                          | 419    |
|                                        |            | % within Describe the nature of your practice ? | 28.9%                                        | 100.0% |
|                                        |            | Adjusted Residual                               | 1.5                                          |        |
|                                        | Private    | Count                                           | 133                                          | 526    |
|                                        |            | % within Describe the nature of your practice ? | 25.3%                                        | 100.0% |
|                                        |            | Adjusted Residual                               | -.9                                          |        |
|                                        | Government | Count                                           | 4                                            | 28     |
|                                        |            | % within Describe the nature of your practice ? | 14.3%                                        | 100.0% |
|                                        |            | Adjusted Residual                               | -1.5                                         |        |
| Total                                  |            | Count                                           | 258                                          | 973    |
|                                        |            | % within Describe the nature of your practice ? | 26.5%                                        | 100.0% |

**Chi-Square Tests**

|                              | Value              | df | Asymp. Sig. (2-sided) |
|------------------------------|--------------------|----|-----------------------|
| Pearson Chi-Square           | 7.102 <sup>a</sup> | 6  | .312                  |
| Likelihood Ratio             | 8.693              | 6  | .192                  |
| Linear-by-Linear Association | 3.257              | 1  | .071                  |
| N of Valid Cases             | 973                |    |                       |

a. 2 cells (16.7%) have expected count less than 5. The minimum expected count is 1.06.



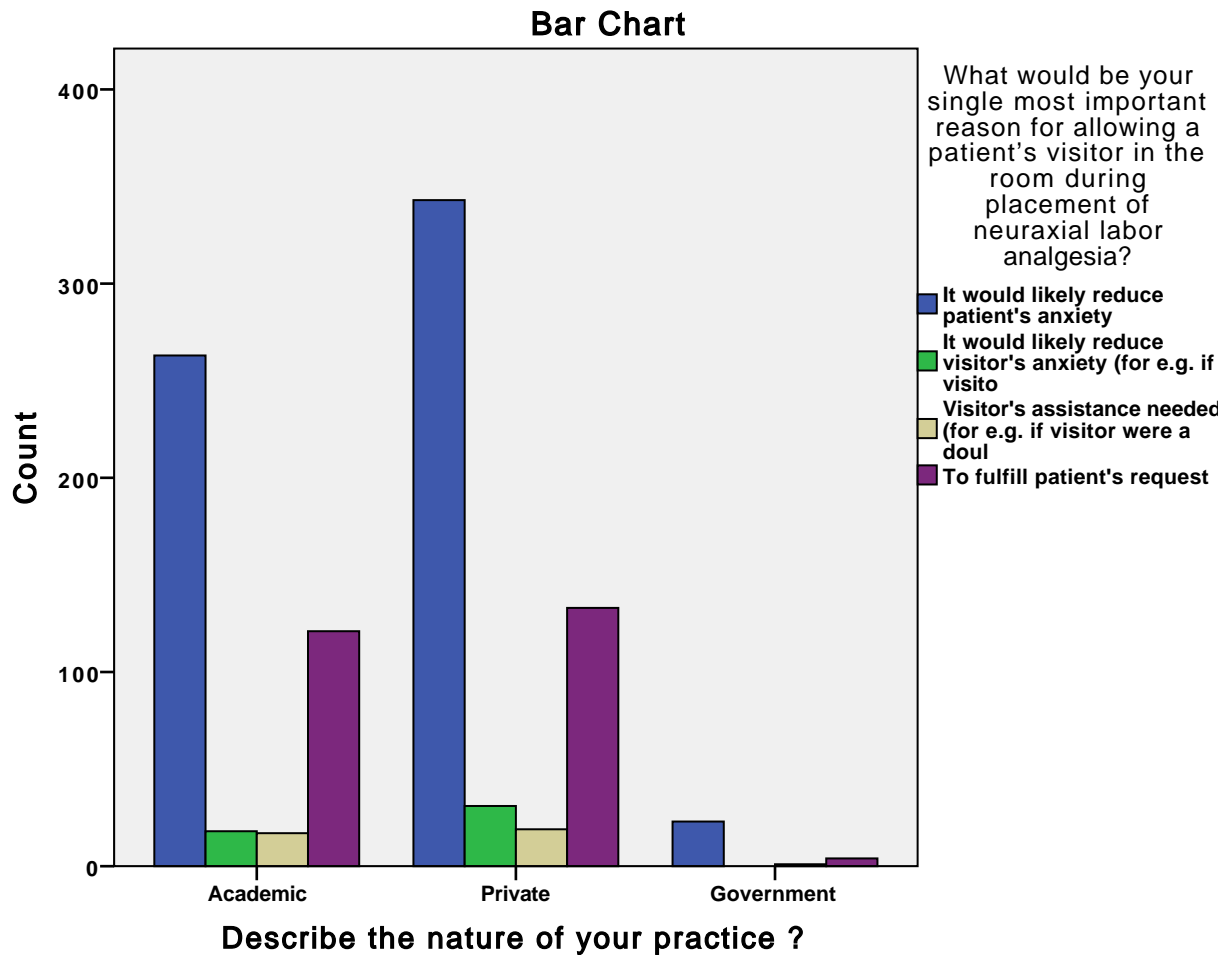

**Describe the nature of your practice ? \* How often has another non-anesthesia member of the labor and delivery team (for example obstetrician or nurse) attempted to influence your decision to have a visitor present during placement of neuraxial labor analgesia?**

**Crosstab**

|                                        |            |                                                 | How often has another non anesthesia member of the labor and delivery team (for example obstetrician or nurse) attempted to influence your decision to have a visitor present during placement of neuraxial labor analgesia? |                           |              |
|----------------------------------------|------------|-------------------------------------------------|------------------------------------------------------------------------------------------------------------------------------------------------------------------------------------------------------------------------------|---------------------------|--------------|
|                                        |            |                                                 | Rarely (< 5 %)                                                                                                                                                                                                               | Occasionally (5 % - 40 %) | Often > 40 % |
| Describe the nature of your practice ? | Academic   | Count                                           | 303                                                                                                                                                                                                                          | 77                        | 39           |
|                                        |            | % within Describe the nature of your practice ? | 72.3%                                                                                                                                                                                                                        | 18.4%                     | 9.3%         |
|                                        |            | Adjusted Residual                               | -.8                                                                                                                                                                                                                          | .2                        | 1.1          |
|                                        | Private    | Count                                           | 393                                                                                                                                                                                                                          | 95                        | 38           |
|                                        |            | % within Describe the nature of your practice ? | 74.7%                                                                                                                                                                                                                        | 18.1%                     | 7.2%         |
|                                        |            | Adjusted Residual                               | .8                                                                                                                                                                                                                           | .0                        | -1.2         |
|                                        | Government | Count                                           | 21                                                                                                                                                                                                                           | 4                         | 3            |
|                                        |            | % within Describe the nature of your practice ? | 75.0%                                                                                                                                                                                                                        | 14.3%                     | 10.7%        |
|                                        |            | Adjusted Residual                               | .2                                                                                                                                                                                                                           | -.5                       | .5           |
| Total                                  |            | Count                                           | 717                                                                                                                                                                                                                          | 176                       | 80           |
|                                        |            | % within Describe the nature of your practice ? | 73.7%                                                                                                                                                                                                                        | 18.1%                     | 8.2%         |

**Crosstab**

|                                        |            |                                                 |        |
|----------------------------------------|------------|-------------------------------------------------|--------|
|                                        |            |                                                 |        |
|                                        |            |                                                 | Total  |
| Describe the nature of your practice ? | Academic   | Count                                           | 419    |
|                                        |            | % within Describe the nature of your practice ? | 100.0% |
|                                        |            | Adjusted Residual                               |        |
|                                        | Private    | Count                                           | 526    |
|                                        |            | % within Describe the nature of your practice ? | 100.0% |
|                                        |            | Adjusted Residual                               |        |
|                                        | Government | Count                                           | 28     |
|                                        |            | % within Describe the nature of your practice ? | 100.0% |
|                                        |            | Adjusted Residual                               |        |
| Total                                  |            | Count                                           | 973    |
|                                        |            | % within Describe the nature of your practice ? | 100.0% |

**Chi-Square Tests**

|                                     | <b>Value</b>             | <b>df</b> | <b>Asymp. Sig. (2-sided)</b> |
|-------------------------------------|--------------------------|-----------|------------------------------|
| <b>Pearson Chi-Square</b>           | <b>1.882<sup>a</sup></b> | <b>4</b>  | <b>.758</b>                  |
| <b>Likelihood Ratio</b>             | <b>1.883</b>             | <b>4</b>  | <b>.757</b>                  |
| <b>Linear-by-Linear Association</b> | <b>.879</b>              | <b>1</b>  | <b>.349</b>                  |
| <b>N of Valid Cases</b>             | <b>973</b>               |           |                              |

a. 1 cells (11.1%) have expected count less than 5. The minimum expected count is 2.30.

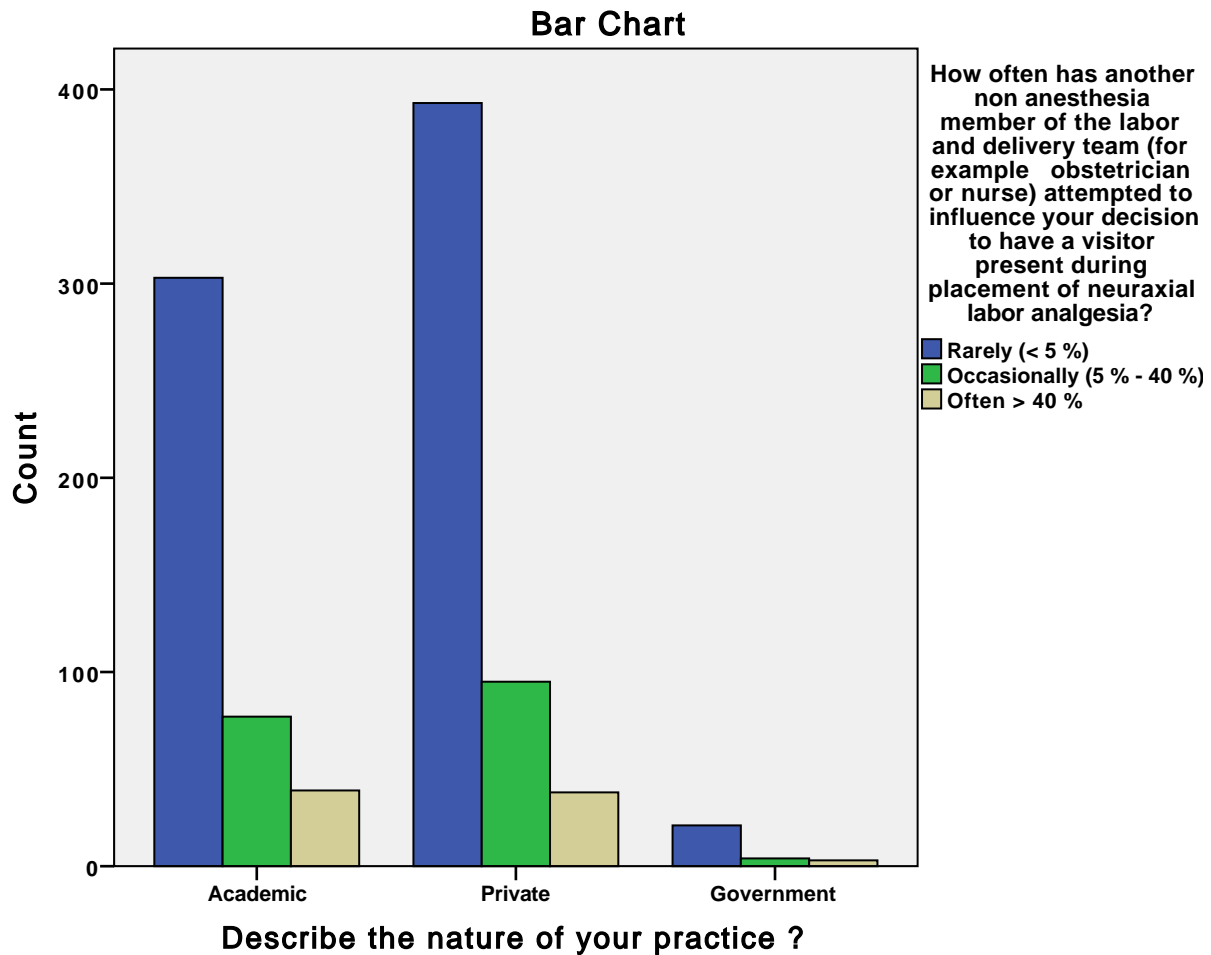

**Describe the nature of your practice ? \* How often has another non anesthesia member of the labor and delivery team (for example obstetrician or nurse) attempted to influence your decision to NOT have a visitor present during placement of neuraxial labor analgesia?**

Crosstab

|                                        |            |                                                 | How often has another non anesthesia member of the labor and delivery team (for example obstetrician or nurse) attempted to influence your decision to NOT have a visitor present during placement of neuraxial labor analgesia? |                       |              |
|----------------------------------------|------------|-------------------------------------------------|----------------------------------------------------------------------------------------------------------------------------------------------------------------------------------------------------------------------------------|-----------------------|--------------|
|                                        |            |                                                 | Rarely < 5 %                                                                                                                                                                                                                     | Occasionally 5 - 40 % | Often > 40 % |
| Describe the nature of your practice ? | Academic   | Count                                           | 128                                                                                                                                                                                                                              | 18                    | 11           |
|                                        |            | % within Describe the nature of your practice ? | 81.5%                                                                                                                                                                                                                            | 11.5%                 | 7.0%         |
|                                        |            | Adjusted Residual                               | 1.3                                                                                                                                                                                                                              | -2.1                  | 1.1          |
|                                        | Private    | Count                                           | 116                                                                                                                                                                                                                              | 32                    | 7            |
|                                        |            | % within Describe the nature of your practice ? | 74.8%                                                                                                                                                                                                                            | 20.6%                 | 4.5%         |
|                                        |            | Adjusted Residual                               | -1.6                                                                                                                                                                                                                             | 2.3                   | -.8          |
|                                        | Government | Count                                           | 9                                                                                                                                                                                                                                | 1                     | 0            |
|                                        |            | % within Describe the nature of your practice ? | 90.0%                                                                                                                                                                                                                            | 10.0%                 | 0.0%         |
|                                        |            | Adjusted Residual                               | .9                                                                                                                                                                                                                               | -.5                   | -.8          |
| Total                                  |            | Count                                           | 253                                                                                                                                                                                                                              | 51                    | 18           |
|                                        |            | % within Describe the nature of your practice ? | 78.6%                                                                                                                                                                                                                            | 15.8%                 | 5.6%         |

**Crosstab**

|                                        |            |                                                 |        |
|----------------------------------------|------------|-------------------------------------------------|--------|
|                                        |            |                                                 | Total  |
| Describe the nature of your practice ? | Academic   | Count                                           | 157    |
|                                        |            | % within Describe the nature of your practice ? | 100.0% |
|                                        |            | Adjusted Residual                               |        |
|                                        | Private    | Count                                           | 155    |
|                                        |            | % within Describe the nature of your practice ? | 100.0% |
|                                        |            | Adjusted Residual                               |        |
|                                        | Government | Count                                           | 10     |
|                                        |            | % within Describe the nature of your practice ? | 100.0% |
|                                        |            | Adjusted Residual                               |        |
| Total                                  |            | Count                                           | 322    |
|                                        |            | % within Describe the nature of your practice ? | 100.0% |

**Chi-Square Tests**

|                                     | <b>Value</b>             | <b>df</b> | <b>Asymp. Sig. (2-sided)</b> |
|-------------------------------------|--------------------------|-----------|------------------------------|
| <b>Pearson Chi-Square</b>           | <b>6.430<sup>a</sup></b> | <b>4</b>  | <b>.169</b>                  |
| <b>Likelihood Ratio</b>             | <b>7.001</b>             | <b>4</b>  | <b>.136</b>                  |
| <b>Linear-by-Linear Association</b> | <b>.017</b>              | <b>1</b>  | <b>.897</b>                  |
| <b>N of Valid Cases</b>             | <b>322</b>               |           |                              |

a. 2 cells (22.2%) have expected count less than 5. The minimum expected count is .56.

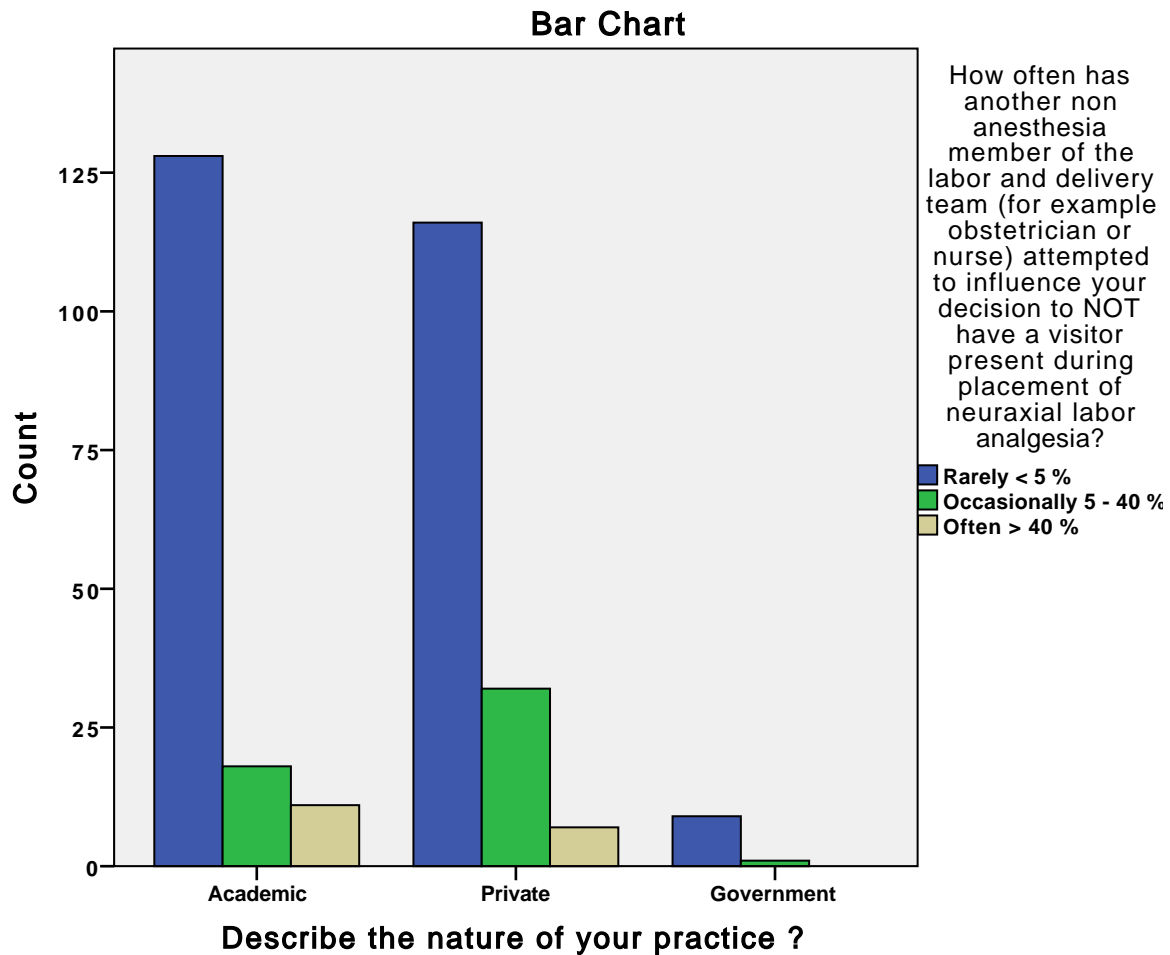

**Describe the nature of your practice ? \* What would be your single most important reason for NOT allowing a patient's visitor in the room during placement of neuraxial labor analgesia?**

Crosstab

|                                        |            |                                                 | What would be your single most important reason for NOT allowing a patient's visitor in the room during placement of neuraxial labor . |                                                              |                                                             |
|----------------------------------------|------------|-------------------------------------------------|----------------------------------------------------------------------------------------------------------------------------------------|--------------------------------------------------------------|-------------------------------------------------------------|
|                                        |            |                                                 | Increase in anesthesiologist's stress                                                                                                  | Possible interference by visitor(for e.g. comments made if d | Concern about visitor (for e.g. passing out or not being ab |
| Describe the nature of your practice ? | Academic   | Count                                           | 12                                                                                                                                     | 73                                                           | 55                                                          |
|                                        |            | % within Describe the nature of your practice ? | 7.6%                                                                                                                                   | 46.5%                                                        | 35.0%                                                       |
|                                        |            | Adjusted Residual                               | .3                                                                                                                                     | -.7                                                          | .8                                                          |
|                                        | Private    | Count                                           | 11                                                                                                                                     | 75                                                           | 51                                                          |
|                                        |            | % within Describe the nature of your practice ? | 7.1%                                                                                                                                   | 48.4%                                                        | 32.9%                                                       |
|                                        |            | Adjusted Residual                               | .0                                                                                                                                     | .0                                                           | .0                                                          |
|                                        | Government | Count                                           | 0                                                                                                                                      | 8                                                            | 0                                                           |
|                                        |            | % within Describe the nature of your practice ? | 0.0%                                                                                                                                   | 80.0%                                                        | 0.0%                                                        |
|                                        |            | Adjusted Residual                               | -.9                                                                                                                                    | 2.0                                                          | -2.3                                                        |
| Total                                  |            | Count                                           | 23                                                                                                                                     | 156                                                          | 106                                                         |
|                                        |            | % within Describe the nature of your practice ? | 7.1%                                                                                                                                   | 48.4%                                                        | 32.9%                                                       |



**Crosstab**

|                                        |            |                                                 | What would be your single most important ... |        |
|----------------------------------------|------------|-------------------------------------------------|----------------------------------------------|--------|
|                                        |            |                                                 | Medico-legal concerns                        | Total  |
| Describe the nature of your practice ? | Academic   | Count                                           | 17                                           | 157    |
|                                        |            | % within Describe the nature of your practice ? | 10.8%                                        | 100.0% |
|                                        |            | Adjusted Residual                               | -.4                                          |        |
|                                        | Private    | Count                                           | 18                                           | 155    |
|                                        |            | % within Describe the nature of your practice ? | 11.6%                                        | 100.0% |
|                                        |            | Adjusted Residual                               | .1                                           |        |
|                                        | Government | Count                                           | 2                                            | 10     |
|                                        |            | % within Describe the nature of your practice ? | 20.0%                                        | 100.0% |
|                                        |            | Adjusted Residual                               | .9                                           |        |
| Total                                  |            | Count                                           | 37                                           | 322    |
|                                        |            | % within Describe the nature of your practice ? | 11.5%                                        | 100.0% |

**Chi-Square Tests**

|                              | Value              | df | Asymp. Sig. (2-sided) |
|------------------------------|--------------------|----|-----------------------|
| Pearson Chi-Square           | 7.145 <sup>a</sup> | 6  | .308                  |
| Likelihood Ratio             | 10.693             | 6  | .098                  |
| Linear-by-Linear Association | .028               | 1  | .867                  |
| N of Valid Cases             | 322                |    |                       |

a. 4 cells (33.3%) have expected count less than 5. The minimum expected count is .71.

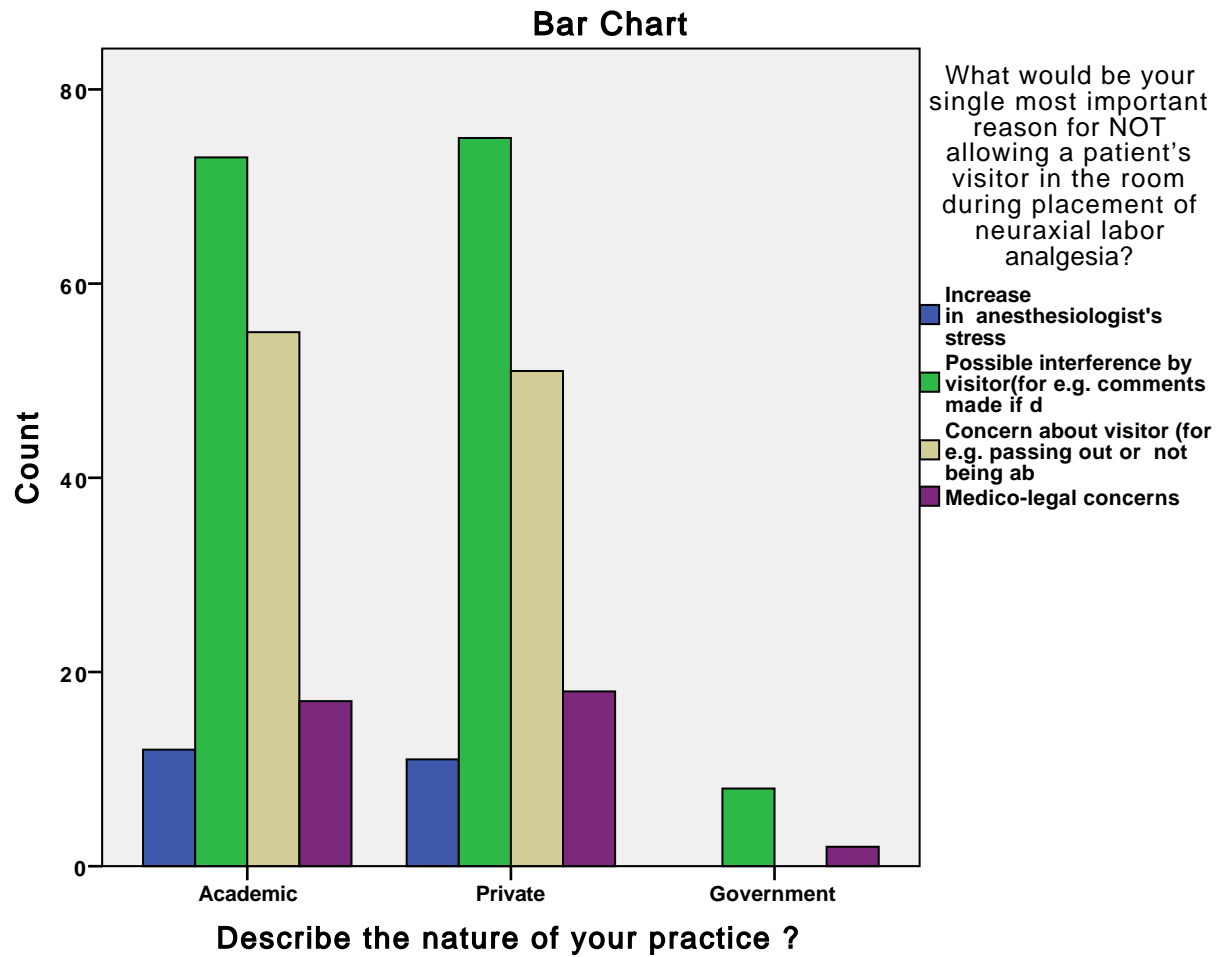

Supplement: f1 [file 3481975.f1.pdf]
